# Supplementary material
Source: PubMed Central journal article supplement (PMC1409698)
Supplement: bj3950137add.pdf [file bj3950137add.pdf]

SUPPLEMENTAL TABLE 1

Changes in gene expression in the medial gastrocnemius of GSL30 mice as compared with wild-type littermates. Genes that passed significance filters consisting of a detection call of 0.5, a *p* -value of 0.05, and an increase or decrease in expression by a magnitude of at least 1.5 fold are listed. A/P, absent/present call; ctl mean, average of wild-type samples; Ctl stdev, standard deviation of wild-type samples; Exp Mean, average of GSL30 samples; Exp stdev, standard deviation of GSL30 samples.

**CARBOHYDRATE METABOLISM**

| GeneSymbol | Genbank   | Unigene   | A/P | Ctl Mean | Ctl stdev | Exp Mean | Exp stdev | P-value | Fold Change | Gene Description                                               |
|------------|-----------|-----------|-----|----------|-----------|----------|-----------|---------|-------------|----------------------------------------------------------------|
| Fbp2       | NM_007994 | Mm.289741 | 1   | 5190     | 816       | 2021     | 218       | 0.00039 | -2.57       | fructose biphosphatase 2                                       |
| Slc35a2    | BM119992  | Mm.214976 | 0.5 | 243      | 53        | 120      | 83        | 0.02748 | -2.02       | solute carrier family 35 (UDP-galactose transporter), member 2 |
| Pygl       | NM_133198 | Mm.256926 | 1   | 931      | 218       | 462      | 99        | 0.00474 | -2.01       | liver glycogen phosphorylase                                   |
| Ldh2       | NM_008492 | Mm.9745   | 1   | 8141     | 694       | 4126     | 734       | 0.00002 | -1.97       | lactate dehydrogenase 2, B chain                               |
| G6pdx      | NM_008062 | Mm.27210  | 1   | 1104     | 264       | 611      | 115       | 0.01238 | -1.81       | glucose-6-phosphate dehydrogenase X-linked                     |
| Slc35a2    | CA751962  | Mm.214976 | 0.8 | 149      | 50        | 83       | 39        | 0.04999 | -1.79       | solute carrier family 35 (UDP-galactose transporter), member 2 |
| Idh3b      | NM_130884 | Mm.29590  | 1   | 800      | 178       | 452      | 144       | 0.00945 | -1.77       | isocitrate dehydrogenase 3 (NAD+) beta                         |
| Ldh2       | BY000444  | Mm.9745   | 1   | 5141     | 376       | 2994     | 931       | 0.00496 | -1.72       | lactate dehydrogenase 2, B chain                               |
| Idh2       | NM_008322 | Mm.246432 | 1   | 11353    | 621       | 6738     | 1813      | 0.00299 | -1.68       | isocitrate dehydrogenase 2 (NADP+), mitochondrial              |
| Pfkfb3     | NM_133232 | Mm.19669  | 1   | 8584     | 2451      | 5297     | 782       | 0.03555 | -1.62       | 6-phosphofructo-2-kinase/fructose-2,6-biphosphatase 3          |
| Amy1       | NM_007446 | Mm.33941  | 1   | 1814     | 463       | 1129     | 82        | 0.03114 | -1.61       | amylase 1, salivary                                            |
| Pgam1      | BI407347  | Mm.16783  | 1   | 980      | 113       | 613      | 104       | 0.00072 | -1.6        | phosphoglycerate mutase 1                                      |
| Ugt1a1     | D87867    | Mm.268456 | 1   | 1861     | 468       | 1167     | 135       | 0.02436 | -1.6        | UDP-glucuronosyltransferase 1 family, member 1                 |
| Ugp2       | AV370025  | Mm.130747 | 1   | 9041     | 1453      | 5688     | 999       | 0.00379 | -1.59       | UDP-glucose pyrophosphorylase 2                                |
| Aldh9a1    | AV028069  | Mm.29803  | 1   | 1060     | 263       | 669      | 93        | 0.02606 | -1.58       | aldehyde dehydrogenase 9, subfamily A1                         |
| Pfkl       | BE914497  | Mm.269649 | 1   | 1094     | 288       | 695      | 151       | 0.03347 | -1.57       | phosphofructokinase, liver                                     |
| Aldh9a1    | BB703752  | Mm.29803  | 1   | 1173     | 268       | 763      | 179       | 0.02503 | -1.54       | aldehyde dehydrogenase 9, subfamily A1                         |
| Ugt1a1     | D87867    | Mm.268456 | 1   | 370      | 84        | 245      | 67        | 0.03198 | -1.51       | UDP-glucuronosyltransferase 1 family, member 1                 |
| Gpi1       | NM_008155 | Mm.589    | 1   | 25212    | 1998      | 38736    | 2801      | 0.00005 | 1.54        | glucose phosphate isomerase 1                                  |
| Pck1       | BB225177  | Mm.266867 | 0.7 | 67       | 18        | 107      | 22        | 0.01438 | 1.59        | phosphoenolpyruvate carboxykinase 1, cytosolic                 |
| Mthfd1     | AV215673  | Mm.29584  | 1   | 69       | 20        | 115      | 36        | 0.04726 | 1.66        | methylenetetrahydrofolate dehydrogenase                        |
| Ppp1r1a    | NM_021391 | Mm.143788 | 1   | 1997     | 398       | 3339     | 481       | 0.00136 | 1.67        | protein phosphatase 1, regulatory (inhibitor) subunit 1A       |
| Gys1/Gys3  | NM_030678 | Mm.275654 | 1   | 2280     | 1242      | 6618     | 1488      | 0.00105 | 2.9         | glycogen synthase 1                                            |

**AMINO ACID METABOLISM**

| GeneSymbol | Genbank   | Unigene    | A/P | Ctl Mean | Ctl stdev | Exp Mean | Exp stdev | P-value | Fold Change | Gene Description                                                 |
|------------|-----------|------------|-----|----------|-----------|----------|-----------|---------|-------------|------------------------------------------------------------------|
| Pah        | AW106920  | Mm.263539  | 1   | 192      | 100       | 69       | 45        | 0.0473  | -2.78       | phenylalanine hydroxylase                                        |
| Phgdh      | L21027    | Mm.16898   | 1   | 207      | 98        | 74       | 70        | 0.0436  | -2.78       | 3-phosphoglycerate dehydrogenase                                 |
| Mat1a      | AW551830  | Mm.14064   | 1   | 297      | 127       | 117      | 97        | 0.0408  | -2.53       | methionine adenosyltransferase I, alpha                          |
| B3galt2    | BB223909  | Mm.285580  | 1   | 67       | 23        | 32       | 18        | 0.02959 | -2.1        | UDP-Gal:betaGlcNAc beta 1,3-galactosyltransferase, polypeptide 2 |
| Cdo1       | NM_033037 | Mm.241056  | 1   | 3585     | 1225      | 1871     | 484       | 0.03344 | -1.92       | cysteine dioxygenase 1, cytosolic                                |
| Mat2a      | AV260654  | Mm.29815.5 | 1   | 2124     | 287       | 1245     | 122       | 0.00149 | -1.71       | methionine adenosyltransferase II, alpha                         |
| Got1       | AA792094  | Mm.19039   | 1   | 21438    | 4990      | 12594    | 1089      | 0.01797 | -1.7        | glutamate oxaloacetate transaminase 1, soluble                   |
| Gatm       | AW108522  | Mm.29975   | 1   | 463      | 109       | 280      | 109       | 0.0296  | -1.65       | glycine amidinotransferase                                       |
| Asns       | BC005552  | Mm.2942    | 1   | 861      | 106       | 528      | 90        | 0.00069 | -1.63       | asparagine synthetase                                            |
| Fah        | NM_010176 | Mm.3798    | 1   | 1458     | 117       | 926      | 97        | 0.00005 | -1.58       | fumarylacetoacetate hydrolase                                    |
| Eprs       | BM238943  | Mm.154511  | 1   | 1501     | 390       | 2267     | 255       | 0.00797 | 1.51        | glutamyl-prolyl-tRNA synthetase                                  |
| Gstm4      | AF464943  | Mm.31203   | 1   | 628      | 166       | 961      | 65        | 0.00895 | 1.53        | glutathione S-transferase, mu 4                                  |
| Art1       | U31510    | Mm.261071  | 1   | 12393    | 792       | 19251    | 1098      | 0.00001 | 1.55        | ADP-ribosyltransferase 1                                         |
| Ahcy       | NM_016661 | Mm.2573    | 1   | 1964     | 218       | 3104     | 375       | 0.00109 | 1.58        | S-adenosylhomocysteine hydrolase                                 |
| Oaz2       | AW214584  | Mm.116749  | 1   | 3945     | 1620      | 6364     | 831       | 0.02496 | 1.61        | ornithine decarboxylase antizyme 2                               |
| Art5       | U60881    | Mm.2816    | 1   | 1709     | 315       | 2810     | 613       | 0.0118  | 1.64        | ADP-ribosyltransferase 5                                         |
| Hrmt1l2    | AK020120  | Mm.27545   | 1   | 1416     | 466       | 2383     | 705       | 0.0377  | 1.68        | HMT1 hnRNP methyltransferase-like 2 (S. cerevisiae)              |
| Slc7a9     | NM_021291 | Mm.45874   | 1   | 159      | 60        | 274      | 39        | 0.00894 | 1.72        | solute carrier family 7, member 9                                |
| Gamt       | AF015887  | Mm.7329    | 1   | 672      | 147       | 1202     | 188       | 0.00112 | 1.79        | guanidinoacetate methyltransferase, muscle contraction           |
| Art5       | AJ297548  | Mm.2816    | 1   | 846      | 147       | 1619     | 193       | 0.00019 | 1.91        | ADP-ribosyltransferase 5                                         |

**LIPID METABOLISM**

| GeneSymbol | Genbank   | Unigene   | A/P | Ctl Mean | Ctl stdev | Exp Mean | Exp stdev | P-value | Fold Change | Gene Description        |
|------------|-----------|-----------|-----|----------|-----------|----------|-----------|---------|-------------|-------------------------|
| Fads3      | NM_021890 | Mm.253875 | 0.6 | 659      | 342       | 112      | 131       | 0.02064 | -5.87       | fatty acid desaturase 3 |
| Cbr2       | BC010758  | Mm.21454  | 1   | 2392     | 534       | 785      | 223       | 0.00159 | -3.05       | carbonyl reductase 2    |

|         |           |           |     |      |      |      |     |         |       |                                                        |
|---------|-----------|-----------|-----|------|------|------|-----|---------|-------|--------------------------------------------------------|
| Fabp4   | BC002148  | Mm.582    | 1   | 2700 | 473  | 933  | 164 | 0.00053 | -2.89 | fatty acid binding protein 4, adipocyte                |
| Pla2g7  | AK005158  | Mm.9277   | 1   | 2128 | 983  | 802  | 277 | 0.03368 | -2.65 | phospholipase A2, group VII                            |
| Cte1    | NM_012006 | Mm.1978   | 1   | 554  | 206  | 239  | 28  | 0.02766 | -2.31 | cytosolic acyl-CoA thioesterase 1                      |
| Pck1    | AW106963  | Mm.266867 | 1   | 4115 | 1012 | 2135 | 837 | 0.00978 | -1.93 | phosphoenolpyruvate carboxykinase 1, cytosolic         |
| Bdh     | BF322712  | Mm.293470 | 1   | 2226 | 793  | 1153 | 231 | 0.03361 | -1.93 | 3-hydroxybutyrate dehydrogenase (heart, mitochondrial) |
| Cav2    | NM_016900 | Mm.31915  | 1   | 2063 | 597  | 1086 | 197 | 0.01777 | -1.9  | caveolin 2                                             |
| Mgll    | BI411560  | Mm.272197 | 1   | 6233 | 1384 | 3282 | 536 | 0.00674 | -1.9  | monoglyceride lipase                                   |
| Lpl     | AK017272  | Mm.1514   | 1   | 7982 | 812  | 4469 | 710 | 0.00009 | -1.79 | lipoprotein lipase                                     |
| Hmgcs1  | BI690696  | Mm.61526  | 1   | 1577 | 382  | 899  | 259 | 0.01343 | -1.75 | 3-hydroxy-3-methylglutaryl-Coenzyme A synthase 1       |
| Mgll    | NM_011844 | Mm.272197 | 1   | 4759 | 716  | 2735 | 521 | 0.00139 | -1.74 | monoglyceride lipase                                   |
| Mgll    | AK006949  | Mm.272197 | 1   | 3594 | 770  | 2188 | 403 | 0.01113 | -1.64 | monoglyceride lipase                                   |
| Hmgcs2  | BC014714  | Mm.289131 | 0.5 | 548  | 132  | 338  | 85  | 0.02029 | -1.62 | 3-hydroxy-3-methylglutaryl-Coenzyme A synthase 2       |
| Hmgcs1  | BI690696  | Mm.61526  | 1   | 984  | 212  | 615  | 225 | 0.02891 | -1.6  | 3-hydroxy-3-methylglutaryl-Coenzyme A synthase 1       |
| Lipe    | NM_010719 | Mm.333679 | 1   | 3587 | 903  | 2270 | 632 | 0.03194 | -1.58 | lipase, hormone sensitive                              |
| Scd2    | NM_009128 | Mm.193096 | 1   | 825  | 98   | 530  | 30  | 0.00135 | -1.56 | stearoyl-Coenzyme A desaturase 2                       |
| Scd2    | BB459479  | Mm.193096 | 0.8 | 740  | 178  | 483  | 130 | 0.03499 | -1.53 | stearoyl-Coenzyme A desaturase 2                       |
| Ephx2   | NM_007940 | Mm.15295  | 1   | 3592 | 481  | 2366 | 581 | 0.0067  | -1.52 | epoxide hydrolase 2, cytoplasmic                       |
| Angptl4 | NM_020581 | Mm.196189 | 1   | 4059 | 883  | 2663 | 314 | 0.02084 | -1.52 | angiopoietin-like 4                                    |
| Fac2    | BI413218  | Mm.210323 | 1   | 8595 | 217  | 5680 | 265 | 0       | -1.51 | fatty acid Coenzyme A ligase, long chain 2             |
| Pltp    | NM_011125 | Mm.6105   | 1   | 2602 | 594  | 1731 | 371 | 0.02741 | -1.5  | phospholipid transfer protein                          |
| Siat10  | NM_018784 | Mm.212742 | 1   | 2495 | 679  | 3812 | 871 | 0.02869 | 1.53  | sialyltransferase 10                                   |
| Plcg2   | AW546508  | Mm.192699 | 1   | 477  | 152  | 752  | 103 | 0.01242 | 1.58  | phospholipase C, gamma 2                               |
| Hsd17b7 | AV235735  | Mm.12882  | 1   | 785  | 158  | 1355 | 233 | 0.00275 | 1.73  | hydroxysteroid (17-beta) dehydrogenase 7               |
| Akr1d1  | BC018333  | Mm.262635 | 0.8 | 180  | 39   | 321  | 102 | 0.03509 | 1.78  | aldo-keto reductase family 1, member D1                |
| Gm2a    | NM_010299 | Mm.287807 | 1   | 521  | 105  | 1036 | 253 | 0.00848 | 1.99  | GM2 ganglioside activator protein                      |

#### MISCELLANEOUS METABOLISM

| GeneSymbol | Genbank   | Unigene   | A/P | Ctl Mean | Ctl stdev | Exp Mean | Exp stdev | P-value | Fold Change | Gene Description                                    |
|------------|-----------|-----------|-----|----------|-----------|----------|-----------|---------|-------------|-----------------------------------------------------|
| Nnmt       | AK006371  | Mm.8362   | 1   | 565      | 182       | 243      | 124       | 0.01384 | -2.32       | nicotinamide N-methyltransferase                    |
| Aldh1a7    | NM_011921 | Mm.14609  | 1   | 610      | 231       | 314      | 92        | 0.04552 | -1.94       | aldehyde dehydrogenase family 1, subfamily A7       |
| Car4       | NM_007607 | Mm.1641   | 1   | 1249     | 262       | 661      | 95        | 0.00526 | -1.89       | carbonic anhydrase 4                                |
| Papss2     | BY038761  | Mm.203916 | 1   | 1066     | 206       | 570      | 131       | 0.00269 | -1.87       | 3'-phosphoadenosine 5'-phosphosulfate synthase 2    |
| Pank1      | NM_023792 | Mm.24742  | 1   | 1755     | 547       | 946      | 58        | 0.03031 | -1.86       | pantothenate kinase 1                               |
| Hmbs       | BB000512  | Mm.247676 | 0.6 | 205      | 47        | 110      | 51        | 0.01622 | -1.86       | hydroxymethylbilane synthase                        |
| Car14      | NM_011797 | Mm.224836 | 1   | 1502     | 383       | 812      | 93        | 0.01748 | -1.85       | carbonic anhydrase 14                               |
| Pdlim1     | NM_016861 | Mm.5567   | 1   | 4934     | 587       | 2848     | 465       | 0.00025 | -1.73       | PDZ and LIM domain 1 (elfin)                        |
| Mte1       | NM_134188 | Mm.45431  | 1   | 1565     | 513       | 916      | 198       | 0.0461  | -1.71       | mitochondrial acyl-CoA thioesterase 1               |
| Xdh        | AV286265  | Mm.11223  | 1   | 1750     | 322       | 1036     | 192       | 0.00378 | -1.69       | xanthine dehydrogenase                              |
| Osbpl11    | BM220135  | Mm.26564  | 1   | 938      | 172       | 574      | 184       | 0.01234 | -1.63       | oxysterol binding protein-like 11                   |
| Sod3       | U38261    | Mm.2407   | 1   | 2877     | 513       | 1783     | 506       | 0.00949 | -1.61       | superoxide dismutase 3, extracellular               |
| Abca1      | BB305534  | Mm.277376 | 1   | 2438     | 350       | 1523     | 145       | 0.00297 | -1.6        | ATP-binding cassette, sub-family A (ABC1), member 1 |
| Smox       | BC004831  | Mm.136586 | 1   | 4437     | 949       | 2832     | 402       | 0.01767 | -1.57       | spermine oxidase                                    |
| Pank1      | AK017345  | Mm.24742  | 1   | 851      | 201       | 545      | 130       | 0.02471 | -1.56       | pantothenate kinase 1                               |
| Vnn1       | NM_011704 | Mm.27154  | 1   | 437      | 86        | 288      | 20        | 0.01991 | -1.52       | vanin 1                                             |
| Car4       | NM_007607 | Mm.1641   | 1   | 988      | 220       | 657      | 92        | 0.0272  | -1.5        | carbonic anhydrase 4                                |
| Aox1       | NM_009676 | Mm.26787  | 1   | 1432     | 243       | 2182     | 127       | 0.00088 | 1.52        | aldehyde oxidase 1                                  |
| Uxs1       | AA203925  | Mm.201248 | 1   | 161      | 66        | 310      | 33        | 0.00429 | 1.92        | UDP-glucuronate decarboxylase 1                     |

#### MUSCLE

| GeneSymbol | Genbank   | Unigene   | A/P | Ctl Mean | Ctl stdev | Exp Mean | Exp stdev | P-value | Fold Change | Gene Description                                          |
|------------|-----------|-----------|-----|----------|-----------|----------|-----------|---------|-------------|-----------------------------------------------------------|
| Ppp1r14a   | NM_026731 | Mm.2343   | 1   | 244      | 86        | 64       | 58        | 0.0061  | -3.82       | protein phosphatase 1, regulatory (inhibitor) subunit 14A |
| Myh6       | NM_080728 | Mm.290003 | 1   | 2083     | 678       | 670      | 251       | 0.00725 | -3.11       | myosin, heavy polypeptide 6, cardiac muscle, alpha        |
| Tpm3       | NM_022314 | Mm.240839 | 1   | 3938     | 1024      | 1586     | 729       | 0.00412 | -2.48       | tropomyosin 3                                             |
| Tpm3       | AV311925  | Mm.17306  | 1   | 974      | 313       | 392      | 232       | 0.01251 | -2.48       | tropomyosin 3                                             |
| Tnnt1      | NM_011618 | Mm.711    | 1   | 3875     | 876       | 1589     | 556       | 0.0017  | -2.44       | troponin T1, skeletal, slow                               |
| Myh6       | NM_080728 | Mm.290003 | 1   | 4159     | 802       | 1745     | 509       | 0.00075 | -2.38       | myosin, heavy polypeptide 6, cardiac muscle, alpha        |
| Tpm3       | NM_022314 | Mm.240839 | 1   | 3460     | 945       | 1555     | 417       | 0.0062  | -2.22       | tropomyosin 3                                             |
| Myh11      | BC026142  | Mm.250705 | 1   | 1054     | 184       | 481      | 34        | 0.00243 | -2.19       | myosin, heavy polypeptide 11, smooth muscle               |

|         |           |           |   |       |      |       |      |         |       |                                                                  |
|---------|-----------|-----------|---|-------|------|-------|------|---------|-------|------------------------------------------------------------------|
| Myo1b   | BI080370  | Mm.305823 | 1 | 745   | 112  | 356   | 63   | 0.00052 | -2.09 | myosin Ib                                                        |
| Tncc    | NM_009393 | Mm.712    | 1 | 5485  | 1181 | 2801  | 1149 | 0.00658 | -1.96 | troponin C, cardiac/slow skeletal                                |
| Casq2   | NM_009814 | Mm.15343  | 1 | 903   | 310  | 463   | 120  | 0.03153 | -1.95 | calsequestrin 2                                                  |
| Tagln   | BB114067  | Mm.283283 | 1 | 3305  | 280  | 1724  | 320  | 0.00003 | -1.92 | transgelin                                                       |
| Myl2    | NM_010861 | Mm.1529   | 1 | 16468 | 1955 | 8673  | 2742 | 0.00129 | -1.9  | myosin, light polypeptide 2, regulatory, cardiac, slow           |
| Mylk    | AI746549  | Mm.247544 | 1 | 946   | 129  | 500   | 69   | 0.00049 | -1.89 | myosin, light polypeptide kinase                                 |
| Cald1   | AV024348  | Mm.308134 | 1 | 2744  | 142  | 1488  | 374  | 0.00092 | -1.84 | caldesmon 1                                                      |
| Myl3    | X67685    | Mm.7353   | 1 | 12179 | 1439 | 6740  | 2019 | 0.00174 | -1.81 | myosin, light polypeptide 3, alkali; ventricular, skeletal, slow |
| Myl3    | AK002312  | Mm.7353   | 1 | 10467 | 590  | 5933  | 1182 | 0.00026 | -1.76 | myosin, light polypeptide 3, alkali; ventricular, skeletal, slow |
| Tnni1   | NM_021467 | Mm.44379  | 1 | 2525  | 692  | 1444  | 261  | 0.02226 | -1.75 | troponin I, skeletal, slow 1                                     |
| Atp2a2  | AA245637  | Mm.227583 | 1 | 6208  | 952  | 3638  | 559  | 0.00201 | -1.71 | ATPase, Ca++ transporting, cardiac muscle, slow twitch 2         |
| Mylk    | BF451748  | Mm.247544 | 1 | 2642  | 463  | 1562  | 244  | 0.00365 | -1.69 | myosin, light polypeptide kinase                                 |
| Utrn    | AI788797  | Mm.331784 | 1 | 1654  | 225  | 987   | 165  | 0.00109 | -1.67 | utrophin (homologous to dystrophin)                              |
| Myl3    | X67685    | Mm.7353   | 1 | 4311  | 413  | 2666  | 762  | 0.00544 | -1.62 | myosin, light polypeptide 3, alkali; ventricular, skeletal, slow |
| Atp2a2  | NM_009722 | Mm.227583 | 1 | 9950  | 1234 | 6236  | 1040 | 0.00088 | -1.6  | ATPase, Ca++ transporting, cardiac muscle, slow twitch 2         |
| Myo10   | BI079918  | Mm.60590  | 1 | 1646  | 212  | 1027  | 235  | 0.00241 | -1.6  | myosin X                                                         |
| Atp2a2  | AA245637  | Mm.227583 | 1 | 804   | 72   | 507   | 44   | 0.0001  | -1.59 | ATPase, Ca++ transporting, cardiac muscle, slow twitch 2         |
| Acta2   | NM_007392 | Mm.213025 | 1 | 7003  | 915  | 4468  | 252  | 0.00189 | -1.57 | actin, alpha 2, smooth muscle, aorta                             |
| Myl9    | AK007972  | Mm.271770 | 1 | 3671  | 712  | 2331  | 473  | 0.00997 | -1.57 | myosin, light polypeptide 9, regulatory                          |
| Myo1b   | AI255256  | Mm.3390   | 1 | 630   | 93   | 404   | 40   | 0.00428 | -1.56 | myosin IB                                                        |
| Myh2    | BC008538  | Mm.34425  | 1 | 23916 | 3170 | 15284 | 2380 | 0.00182 | -1.56 | myosin, heavy polypeptide 2, skeletal muscle, adult              |
| Cnn3    | BB724741  | Mm.22171  | 1 | 3366  | 555  | 2161  | 420  | 0.00616 | -1.56 | calponin 3, acidic, tropomyosin binding, troponin C binding      |
| Atp2a2  | BI248739  | Mm.227583 | 1 | 3067  | 335  | 1998  | 345  | 0.0011  | -1.53 | ATPase, Ca++ transporting, cardiac muscle, slow twitch 2         |
| Sync    | AK004279  | Mm.132243 | 1 | 691   | 84   | 1039  | 233  | 0.02568 | 1.5   | syncoilin                                                        |
| Cacna1s | BY366917  | Mm.4418   | 1 | 5946  | 933  | 8951  | 1558 | 0.00765 | 1.51  | calcium channel, voltage-dependent, L type, alpha 1S subunit     |
| Ache    | NM_009599 | Mm.255464 | 1 | 566   | 133  | 864   | 130  | 0.00727 | 1.53  | acetylcholinesterase                                             |
| Tpm2    | NM_009416 | Mm.646    | 1 | 19336 | 2162 | 29850 | 2148 | 0.00006 | 1.54  | tropomyosin 2, beta                                              |
| Lmna    | NM_019390 | Mm.243014 | 1 | 1391  | 228  | 2201  | 312  | 0.00226 | 1.58  | lamin A                                                          |
| Tpm2    | BC024358  | Mm.646    | 1 | 10655 | 959  | 17175 | 2259 | 0.00193 | 1.61  | tropomyosin 2, beta                                              |
| Myh1    | AJ002522  | Mm.340132 | 1 | 1884  | 533  | 3084  | 428  | 0.00441 | 1.64  | myosin, heavy polypeptide 1, skeletal muscle, adult              |
| Des     | AA738859  | Mm.6712   | 1 | 25559 | 3323 | 43093 | 7218 | 0.00262 | 1.69  | desmin                                                           |
| Myo5a   | NM_010864 | Mm.3645   | 1 | 189   | 52   | 323   | 104  | 0.04263 | 1.71  | myosin Va                                                        |
| Sync    | NM_023485 | Mm.132243 | 1 | 475   | 54   | 819   | 198  | 0.0135  | 1.72  | syncoilin                                                        |
| Tpm2    | NM_009416 | Mm.646    | 1 | 16912 | 2969 | 29762 | 3440 | 0.00023 | 1.76  | tropomyosin 2, beta                                              |
| Myoz1   | BB216883  | Mm.141702 | 1 | 1409  | 321  | 2632  | 340  | 0.00039 | 1.87  | myozenin 1                                                       |
| Sync    | AK004279  | Mm.132243 | 1 | 357   | 114  | 746   | 163  | 0.00331 | 2.09  | syncoilin                                                        |
| Mybph   | NM_016749 | Mm.269621 | 1 | 4305  | 1669 | 9388  | 1170 | 0.00084 | 2.18  | myosin binding protein H                                         |
| Actc1   | NM_009608 | Mm.686    | 1 | 5377  | 1577 | 19028 | 2141 | 0.00001 | 3.54  | actin, alpha, cardiac                                            |

#### WNT PATHWAY

| GeneSymbol | Genbank   | Unigene   | A/P | Ctl Mean | Ctl stdev | Exp Mean | Exp stdev | P-value | Fold Change | Gene Description                                        |
|------------|-----------|-----------|-----|----------|-----------|----------|-----------|---------|-------------|---------------------------------------------------------|
| Dkk3       | AK004853  | Mm.55143  | 1   | 576      | 221       | 214      | 55        | 0.02414 | -2.68       | dickkopf homolog 3 (Xenopus laevis)                     |
| Tcf4       | CA567227  | Mm.4269   | 1   | 196      | 48        | 100      | 48        | 0.01388 | -1.95       | transcription factor 4                                  |
| Smo        | AW555326  | Mm.29279  | 1   | 624      | 132       | 346      | 47        | 0.00686 | -1.8        | smoothened homolog (Drosophila)                         |
| Tcf7l2     | BB175494  | Mm.139815 | 1   | 341      | 61        | 203      | 46        | 0.00519 | -1.68       | transcription factor 7-like 2, T-cell specific, HMG-box |
| Wnt6       | CB273307  | Mm.6358   | 0.8 | 1030     | 164       | 647      | 118       | 0.00397 | -1.59       | wingless-related MMTV integration site 6                |
| Tcf4       | U16321    | Mm.4269   | 1   | 1274     | 298       | 804      | 217       | 0.02485 | -1.58       | transcription factor 4                                  |
| Tcf1       | NM_009336 | Mm.133919 | 1   | 3577     | 867       | 5739     | 876       | 0.00443 | 1.6         | transcription factor-like 1                             |
| Pkd1       | BB759096  | Mm.290442 | 1   | 1884     | 243       | 3491     | 440       | 0.00038 | 1.85        | polycystic kidney disease 1 homolog                     |

#### TRANSCRIPTION FACTOR/REGULATION OF TRANSCRIPTION

| GeneSymbol | Genbank   | Unigene   | A/P | Ctl Mean | Ctl stdev | Exp Mean | Exp stdev | P-value | Fold Change | Gene Description                                                             |
|------------|-----------|-----------|-----|----------|-----------|----------|-----------|---------|-------------|------------------------------------------------------------------------------|
| Peg3       | NM_008817 | Mm.7952   | 1   | 543      | 225       | 129      | 59        | 0.01059 | -4.2        | paternally expressed 3                                                       |
| Pparg      | NM_011146 | Mm.3020   | 1   | 388      | 133       | 128      | 108       | 0.0097  | -3.02       | peroxisome proliferator activated receptor gamma                             |
| Wdr9       | BQ031260  | Mm.240871 | 1   | 323      | 70        | 164      | 24        | 0.00497 | -1.97       | WD repeat domain 9                                                           |
| Zfp37      | X89264    | Mm.5011   | 1   | 120      | 33        | 61       | 35        | 0.02851 | -1.95       | zinc finger protein 37                                                       |
| Meox2      | BC002076  | Mm.153716 | 1   | 531      | 148       | 272      | 103       | 0.015   | -1.95       | mesenchyme homeobox 2                                                        |
| Smarcd2    | NM_031878 | Mm.21772  | 1   | 1121     | 347       | 615      | 286       | 0.03636 | -1.82       | SWI/SNF rel, matrix assoc, actin dep reg of chromatin, subfamily d, member 2 |

|          |           |           |   |       |      |       |      |         |       |                                                                              |
|----------|-----------|-----------|---|-------|------|-------|------|---------|-------|------------------------------------------------------------------------------|
| Notch4   | NM_010929 | Mm.173813 | 1 | 585   | 67   | 333   | 102  | 0.00254 | -1.75 | Notch gene homolog 4 (Drosophila)                                            |
| Peg3     | BM200248  | Mm.7952   | 1 | 1642  | 328  | 954   | 266  | 0.00662 | -1.72 | paternally expressed 3                                                       |
| Plagl1   | AF147785  | Mm.287857 | 1 | 1171  | 343  | 687   | 142  | 0.03335 | -1.7  | pleiomorphic adenoma gene-like 1                                             |
| Nfat5    | BM239652  | Mm.302083 | 1 | 1068  | 195  | 638   | 108  | 0.00505 | -1.67 | nuclear factor of activated T-cells 5                                        |
| Shank3   | NM_021423 | Mm.146855 | 1 | 1307  | 223  | 785   | 245  | 0.00793 | -1.66 | SH3/ankyrin domain gene 3                                                    |
| Meox2    | BC002076  | Mm.153716 | 1 | 1144  | 285  | 693   | 276  | 0.03491 | -1.65 | mesenchyme homeobox 2                                                        |
| Hoxd10   | BC013463  | Mm.24420  | 1 | 282   | 46   | 176   | 27   | 0.00446 | -1.6  | homeo box D10                                                                |
| Sirt1    | NM_019812 | Mm.150679 | 1 | 398   | 83   | 252   | 52   | 0.01309 | -1.58 | sirtuin (silent mating type information regulation 2 homolog) 1              |
| Litaf    | BG072227  | Mm.294753 | 1 | 1480  | 155  | 974   | 196  | 0.00195 | -1.52 | LPS-induced TN factor                                                        |
| Jun      | BC002081  | Mm.275071 | 1 | 6293  | 910  | 4135  | 830  | 0.00444 | -1.52 | Jun oncogene                                                                 |
| Ets2     | BC005486  | Mm.290207 | 1 | 2520  | 374  | 1669  | 296  | 0.00405 | -1.51 | E26 avian leukemia oncogene 2, 3' domain                                     |
| Smarcd3  | NM_025891 | Mm.332257 | 1 | 4228  | 516  | 6400  | 560  | 0.00022 | 1.51  | SWI/SNF rel, matrix assoc, actin dep reg of chromatin, subfamily d, member 3 |
| Dedd     | BM121177  | Mm.270139 | 1 | 286   | 50   | 434   | 82   | 0.0109  | 1.52  | death effector domain-containing                                             |
| Dbp      | BC018323  | Mm.3459   | 1 | 641   | 178  | 980   | 202  | 0.02269 | 1.53  | D site albumin promoter binding protein                                      |
| Pdlim3   | NM_016798 | Mm.282900 | 1 | 17407 | 1893 | 26773 | 3229 | 0.00139 | 1.54  | PDZ and LIM domain 3                                                         |
| Rnf14    | AF249668  | Mm.22086  | 1 | 1589  | 297  | 2441  | 543  | 0.02184 | 1.54  | ring finger protein 14                                                       |
| Phf7     | AI427892  | Mm.5348   | 1 | 513   | 91   | 789   | 97   | 0.00176 | 1.54  | PHD finger protein 7                                                         |
| Six2     | D83147    | Mm.5039   | 1 | 751   | 147  | 1172  | 212  | 0.00822 | 1.56  | sine oculis-related homeobox 2 homolog (Drosophila)                          |
| Tcfcb    | NM_011549 | Mm.2305   | 1 | 1289  | 291  | 2030  | 411  | 0.01339 | 1.57  | transcription factor EB                                                      |
| Trp53bp1 | AJ414734  | Mm.215389 | 1 | 539   | 109  | 849   | 157  | 0.00858 | 1.57  | transformation related protein 53 binding protein 1                          |
| Sepr     | NM_013759 | Mm.28212  | 1 | 5383  | 1168 | 8483  | 736  | 0.00153 | 1.58  | selenoprotein R                                                              |
| Mta1     | NM_054081 | Mm.212577 | 1 | 1056  | 271  | 1677  | 156  | 0.00441 | 1.59  | metastasis associated 1                                                      |
| Zfp68    | BM247506  | Mm.27575  | 1 | 210   | 43   | 334   | 87   | 0.02921 | 1.59  | Zinc finger protein 68                                                       |
| Tcea3    | BC010807  | Mm.112    | 1 | 3157  | 760  | 5047  | 489  | 0.00229 | 1.6   | transcription elongation factor A (SII), 3                                   |
| Rfx5     | BB392192  | Mm.24308  | 1 | 494   | 46   | 802   | 160  | 0.00909 | 1.62  | regulatory factor X, 5 (influences HLA class II expression)                  |
| Lrrfip1  | NM_008515 | Mm.45039  | 1 | 1439  | 140  | 2442  | 327  | 0.00149 | 1.7   | leucine rich repeat (in FLII) interacting protein 1                          |
| Smarca1  | NM_053123 | Mm.229151 | 1 | 131   | 12   | 226   | 50   | 0.00942 | 1.72  | SWI/SNF rel, matrix assoc, actin dep reg of chromatin, subfamily a, member 1 |
| Zfp358   | BF449729  | Mm.299073 | 1 | 1272  | 275  | 2237  | 465  | 0.00722 | 1.76  | hypothetical protein C130036G08                                              |
| Zfp93    | NM_009567 | Mm.5066   | 1 | 203   | 21   | 358   | 57   | 0.00243 | 1.76  | zinc finger protein 93                                                       |
| Tbx15    | NM_011534 | Mm.88761  | 1 | 1021  | 324  | 1883  | 523  | 0.0166  | 1.84  | T-box 15                                                                     |
| Mllt3    | AK019458  | Mm.288898 | 1 | 1330  | 270  | 2487  | 502  | 0.00395 | 1.87  | myeloid/lymphoid or mixed-lineage leukemia trithorax homolog                 |
| Relb     | NM_009046 | Mm.1741   | 1 | 441   | 47   | 834   | 165  | 0.00369 | 1.89  | avian reticuloendotheliosis viral (v-rel) oncogene related B                 |
| Nr5a1    | BY008174  | Mm.31387  | 1 | 284   | 92   | 542   | 177  | 0.02829 | 1.9   | nuclear receptor subfamily 5, group A, member 1                              |
| Mef2c    | AI595932  | Mm.24001  | 1 | 1826  | 1098 | 3528  | 923  | 0.02913 | 1.93  | myocyte enhancer factor 2C                                                   |
| Mllt6    | AY050217  | Mm.23685  | 1 | 152   | 23   | 295   | 78   | 0.01107 | 1.94  | myeloid/lymphoid or mixed lineage-leukemia translocation to 6 homolog        |
| Hdac11   | BC016208  | Mm.206218 | 1 | 357   | 54   | 848   | 125  | 0.00049 | 2.37  | histone deacetylase 11                                                       |

#### EXTRACELLULAR/MATRIX/CYTOPLASMIC

| GeneSymbol | Genbank   | Unigene   | A/P | Ctl Mean | Ctl stdev | Exp Mean | Exp stdev | P-value | Fold Change | Gene Description                                  |
|------------|-----------|-----------|-----|----------|-----------|----------|-----------|---------|-------------|---------------------------------------------------|
| Vegfa      | CA748355  | Mm.31540  | 1   | 1960     | 260       | 1019     | 105       | 0.00067 | -1.92       | vascular endothelial growth factor A              |
| Prelp      | BC019775  | Mm.214514 | 1   | 5254     | 1037      | 2776     | 788       | 0.00379 | -1.89       | proline arginine-rich end leucine-rich repeat     |
| Vtn        | NM_011707 | Mm.3667   | 1   | 1702     | 339       | 899      | 74        | 0.00668 | -1.89       | vitronectin                                       |
| Nox4       | AB041034  | Mm.31748  | 0.8 | 173      | 39        | 94       | 41        | 0.01534 | -1.83       | NADPH oxidase 4                                   |
| Thbs3      | NM_013691 | Mm.2114   | 1   | 314      | 49        | 175      | 66        | 0.0073  | -1.79       | thrombospondin 3                                  |
| Prg4       | NM_021400 | Mm.212696 | 1   | 2211     | 631       | 1233     | 454       | 0.02611 | -1.79       | proteoglycan 4                                    |
| Bmp6       | NM_007556 | Mm.254978 | 1   | 1320     | 191       | 736      | 97        | 0.00091 | -1.79       | bone morphogenetic protein 6                      |
| Lama4      | U69176    | Mm.258065 | 0.8 | 1450     | 266       | 833      | 350       | 0.01647 | -1.74       | laminin, alpha 4                                  |
| Fgfbp1     | U49641    | Mm.46053  | 1   | 654      | 76        | 378      | 63        | 0.00024 | -1.73       | fibroblast growth factor binding protein 1        |
| Igfbp3     | AV175389  | Mm.29254  | 1   | 727      | 136       | 428      | 137       | 0.00849 | -1.7        | insulin-like growth factor binding protein 3      |
| Vwf        | BB667216  | Mm.22339  | 1   | 1225     | 271       | 721      | 112       | 0.01222 | -1.7        | Von Willebrand factor homolog                     |
| Mmp2       | BF147716  | Mm.334701 | 1   | 3552     | 679       | 2152     | 298       | 0.00835 | -1.65       | matrix metalloproteinase 2                        |
| Vtn        | BB251864  | Mm.3667   | 1   | 258      | 41        | 157      | 58        | 0.0173  | -1.64       | vitronectin                                       |
| Pcolce2    | AF352788  | Mm.46016  | 1   | 1506     | 288       | 923      | 164       | 0.00778 | -1.63       | procollagen C-endopeptidase enhancer 2            |
| Bgn        | AI931862  | Mm.2608   | 1   | 2252     | 556       | 1419     | 566       | 0.04721 | -1.59       | biglycan                                          |
| Dpt        | NM_019759 | Mm.28935  | 1   | 11433    | 2015      | 7233     | 1273      | 0.00561 | -1.58       | dermatopontin                                     |
| Timp4      | BB328405  | Mm.36851  | 1   | 2456     | 666       | 1552     | 470       | 0.04237 | -1.58       | tissue inhibitor of metalloproteinase 4           |
| Acrp30     | NM_009605 | Mm.3969   | 1   | 17387    | 4249      | 11124    | 2716      | 0.02744 | -1.56       | adipocyte complement related protein, Adiponectin |
| Col4a5     | BM250666  | Mm.286892 | 1   | 356      | 66        | 228      | 67        | 0.01712 | -1.56       | procollagen, type IV, alpha 5                     |
| Thbs1      | AV026492  | Mm.4159   | 1   | 686      | 100       | 443      | 129       | 0.01043 | -1.55       | thrombospondin 1                                  |

|         |           |           |     |      |      |       |     |         |       |                                                         |
|---------|-----------|-----------|-----|------|------|-------|-----|---------|-------|---------------------------------------------------------|
| Fbln5   | NM_011812 | Mm.288381 | 1   | 2611 | 535  | 1709  | 291 | 0.01626 | -1.53 | fibulin 5                                               |
| Col4a2  | CA564668  | Mm.181021 | 1   | 4709 | 453  | 3074  | 367 | 0.00024 | -1.53 | procollagen, type IV, alpha 2                           |
| Tnxb    | NM_031176 | Mm.290527 | 1   | 4631 | 722  | 3058  | 597 | 0.00562 | -1.51 | tenascin XB                                             |
| Col4a1  | BF158638  | Mm.738    | 1   | 7332 | 743  | 4868  | 338 | 0.00052 | -1.51 | procollagen, type IV, alpha 1                           |
| Tuba8   | NM_017379 | Mm.32884  | 1   | 6983 | 1086 | 10512 | 604 | 0.00072 | 1.51  | tubulin, alpha 8                                        |
| Pdgfc   | NM_019971 | Mm.40268  | 1   | 422  | 108  | 650   | 58  | 0.00594 | 1.54  | platelet-derived growth factor, C polypeptide           |
| Sgcg    | BB519683  | Mm.72173  | 1   | 1130 | 246  | 1799  | 328 | 0.00824 | 1.59  | sarcoglycan, gamma (dystrophin-associated glycoprotein) |
| Ndph    | NM_010883 | Mm.5014   | 0.5 | 112  | 27   | 187   | 52  | 0.03009 | 1.67  | Norrie disease homolog                                  |
| Col9a1  | AK004383  | Mm.154662 | 1   | 244  | 80   | 423   | 97  | 0.01324 | 1.73  | collagen, type IX, alpha 1                              |
| Pdgfc   | NM_019971 | Mm.40268  | 1   | 248  | 50   | 453   | 110 | 0.00928 | 1.83  | platelet-derived growth factor, C polypeptide           |
| Nodal   | X70514    | Mm.57195  | 1   | 292  | 52   | 573   | 179 | 0.02032 | 1.96  | nodal                                                   |
| Krt2-6a | NM_008476 | Mm.22629  | 0.6 | 203  | 69   | 435   | 144 | 0.0177  | 2.14  | keratin complex 2, basic, gene 6a                       |
| Tekt1   | AK005801  | Mm.42257  | 1   | 127  | 29   | 347   | 102 | 0.00576 | 2.73  | tektin 1                                                |

## RECEPTORS

| GeneSymbol | Genbank   | Unigene   | A/P | Ctl Mean | Ctl stdev | Exp Mean | Exp stdev | P-value | Fold Change | Gene Description                                                    |
|------------|-----------|-----------|-----|----------|-----------|----------|-----------|---------|-------------|---------------------------------------------------------------------|
| Ceacam1    | BC024320  | Mm.14114  | 0.7 | 572      | 110       | 258      | 184       | 0.01373 | -2.22       | carcinoembryonic antigen-related cell adhesion molecule 1           |
| Trpm7      | AF376052  | Mm.244705 | 1   | 985      | 150       | 490      | 85        | 0.0007  | -2.01       | transient receptor potential cation channel, subfamily M, member 7  |
| Tie1       | NM_011587 | Mm.4345   | 1   | 870      | 195       | 437      | 103       | 0.0046  | -1.99       | tyrosine kinase receptor 1                                          |
| F11r       | BC021876  | Mm.294882 | 1   | 764      | 91        | 394      | 61        | 0.00014 | -1.94       | F11 receptor                                                        |
| Fmod       | BB532202  | Mm.41573  | 1   | 4580     | 874       | 2479     | 546       | 0.00262 | -1.85       | fibromodulin                                                        |
| Pdgfrb     | CA563430  | Mm.4146   | 1   | 1023     | 170       | 576      | 191       | 0.00453 | -1.78       | platelet derived growth factor receptor, beta polypeptide           |
| Cd36       | AK004192  | Mm.18628  | 1   | 16485    | 1312      | 9272     | 1091      | 0.00001 | -1.78       | CD36 antigen                                                        |
| Mmd        | BC021914  | Mm.277518 | 1   | 3521     | 930       | 1974     | 544       | 0.01845 | -1.78       | monocyte to macrophage differentiation-associated                   |
| Adrb2      | AV083350  | Mm.5598   | 1   | 1071     | 254       | 602      | 177       | 0.0118  | -1.78       | adrenergic receptor, beta 2                                         |
| Cd36       | BE307351  | Mm.18628  | 1   | 13255    | 1549      | 7961     | 1523      | 0.00061 | -1.66       | CD36 antigen                                                        |
| Acvr2      | BB818297  | Mm.247684 | 0.9 | 499      | 80        | 304      | 153       | 0.04586 | -1.64       | activin receptor IIA                                                |
| Procr      | NM_011171 | Mm.3243   | 1   | 890      | 184       | 553      | 152       | 0.01368 | -1.61       | protein C receptor, endothelial                                     |
| Cd36       | BB534670  | Mm.18628  | 1   | 2923     | 517       | 1818     | 237       | 0.00488 | -1.61       | CD36 antigen                                                        |
| Fmod       | BB483571  | Mm.287146 | 1   | 3766     | 407       | 2335     | 240       | 0.00051 | -1.61       | fibromodulin                                                        |
| Fmod       | BB504826  | Mm.41573  | 1   | 1991     | 417       | 1260     | 160       | 0.0146  | -1.58       | fibromodulin                                                        |
| C1qr1      | NM_010740 | Mm.681    | 1   | 2335     | 401       | 1475     | 250       | 0.00479 | -1.58       | complement component 1, q subcomponent, receptor 1                  |
| Msr1       | AA183642  | Mm.239291 | 0.5 | 277      | 77        | 175      | 45        | 0.04384 | -1.58       | macrophage scavenger receptor 1                                     |
| Fmod       | NM_021355 | Mm.287146 | 1   | 9866     | 1293      | 6407     | 1509      | 0.0046  | -1.54       | fibromodulin                                                        |
| Nrp        | AK002673  | Mm.300641 | 1   | 2534     | 532       | 1661     | 240       | 0.01557 | -1.53       | Cystatin related protein 1 precursor (CRP-1)                        |
| Itga6      | BM935811  | Mm.225096 | 1   | 1603     | 414       | 1051     | 201       | 0.03675 | -1.52       | integrin alpha 6                                                    |
| Acvr2      | BY014959  | Mm.247684 | 1   | 1768     | 259       | 1171     | 162       | 0.0033  | -1.51       | activin receptor IIA                                                |
| Tek        | NM_013690 | Mm.14313  | 1   | 1535     | 258       | 1022     | 219       | 0.00965 | -1.5        | endothelial-specific receptor tyrosine kinase                       |
| Sdfr1      | BB464493  | Mm.157560 | 1   | 2487     | 359       | 4022     | 599       | 0.00173 | 1.62        | stromal cell derived factor receptor 1                              |
| Tnfrsf12a  | NM_013749 | Mm.28518  | 1   | 3024     | 1228      | 4950     | 1109      | 0.03148 | 1.64        | tumor necrosis factor receptor superfamily, member 12a              |
| Tnfrsf19   | AF167552  | Mm.281356 | 1   | 427      | 134       | 724      | 162       | 0.01382 | 1.69        | tumor necrosis factor receptor superfamily, member 19               |
| Tnfrsf23   | NM_024290 | Mm.290780 | 0.8 | 288      | 120       | 501      | 109       | 0.01898 | 1.74        | tumor necrosis factor receptor superfamily, member 23               |
| Tirap      | BY017242  | Mm.23987  | 0.6 | 790      | 172       | 1390     | 272       | 0.00425 | 1.76        | toll-interleukin 1 receptor (TIR) domain-containing adaptor protein |
| Itgb6      | AK019511  | Mm.98193  | 1   | 145      | 26        | 282      | 98        | 0.02972 | 1.94        | integrin, beta 6                                                    |
| Ogfr       | NM_031373 | Mm.250418 | 1   | 1645     | 226       | 3250     | 326       | 0.00004 | 1.98        | opioid growth factor receptor                                       |
| Tnfrsf19   | NM_013869 | Mm.281356 | 1   | 741      | 68        | 1629     | 259       | 0.00071 | 2.2         | tumor necrosis factor receptor superfamily, member 19               |
| Crhr2      | NM_009953 | Mm.4546   | 1   | 130      | 25        | 302      | 55        | 0.00076 | 2.31        | corticotropin releasing hormone receptor 2                          |
| Ogfr       | AW476433  | Mm.250418 | 1   | 560      | 280       | 1301     | 373       | 0.00943 | 2.32        | opioid growth factor receptor                                       |
| Crhr2      | U21729    | Mm.4546   | 1   | 252      | 74        | 655      | 139       | 0.00125 | 2.6         | corticotropin releasing hormone receptor 2                          |

## SIGNAL TRANSDUCTION

| GeneSymbol | Genbank   | Unigene   | A/P | Ctl Mean | Ctl stdev | Exp Mean | Exp stdev | P-value | Fold Change | Gene Description                                                            |
|------------|-----------|-----------|-----|----------|-----------|----------|-----------|---------|-------------|-----------------------------------------------------------------------------|
| Erb2ip     | BM240030  | Mm.277354 | 0.5 | 145      | 29        | 69       | 53        | 0.03295 | -2.09       | Erb2 interacting protein                                                    |
| Cidea      | NM_007702 | Mm.449    | 1   | 1485     | 548       | 716      | 290       | 0.03238 | -2.07       | cell death-inducing DNA fragmentation factor, alpha subunit-like effector A |
| Cdc42ep3   | BB012489  | Mm.275926 | 1   | 1165     | 200       | 581      | 86        | 0.00186 | -2          | CDC42 effector protein (Rho GTPase binding) 3                               |
| Plcb4      | AF332072  | Mm.38009  | 0.8 | 329      | 57        | 165      | 39        | 0.0012  | -1.99       | phospholipase C, beta 4                                                     |
| Gdf10      | L42114    | Mm.40323  | 1   | 427      | 87        | 240      | 37        | 0.00724 | -1.78       | growth differentiation factor 10                                            |
| Pecam      | NM_008816 | Mm.276652 | 1   | 3287     | 264       | 1882     | 419       | 0.00039 | -1.75       | platelet/endothelial cell adhesion molecule                                 |

|          |           |           |     |       |      |       |      |         |       |                                                                          |
|----------|-----------|-----------|-----|-------|------|-------|------|---------|-------|--------------------------------------------------------------------------|
| Pde2a    | BG069616  | Mm.247564 | 1   | 1375  | 363  | 798   | 134  | 0.02078 | -1.72 | phosphodiesterase 2A, cGMP-stimulated                                    |
| Dbi      | AV007315  | Mm.2785   | 1   | 4353  | 1084 | 2544  | 553  | 0.01595 | -1.71 | diazepam binding inhibitor                                               |
| Ywhaq    | BB422130  | Mm.313073 | 1   | 1664  | 341  | 1010  | 263  | 0.00944 | -1.65 | Y 3-monooxygenase/tryptophan 5-monooxygenase activation protein, theta   |
| Ywhab    | NM_018753 | Mm.34319  | 1   | 1216  | 137  | 751   | 157  | 0.00107 | -1.62 | Y 3-monooxygenase/tryptophan 5-monooxygenase activation protein, beta    |
| Nedd9    | NM_017464 | Mm.8315   | 1   | 398   | 83   | 250   | 85   | 0.02399 | -1.59 | neural precursor cell expressed, developmentally down-regulated gene 9   |
| Dbi      | NM_007830 | Mm.2785   | 1   | 6633  | 1458 | 4226  | 848  | 0.01885 | -1.57 | diazepam binding inhibitor                                               |
| Pdzx     | NM_018832 | Mm.67912  | 1   | 663   | 144  | 424   | 139  | 0.02882 | -1.56 | PDZ domain containing, X chromosome                                      |
| Adcy4    | NM_080435 | Mm.287010 | 0.8 | 411   | 95   | 269   | 87   | 0.03936 | -1.53 | adenylate cyclase 4                                                      |
| Erbb2ip  | BC028256  | Mm.277354 | 1   | 932   | 247  | 618   | 115  | 0.04204 | -1.51 | erbb2 interacting protein                                                |
| Cd47     | BQ256022  | Mm.31752  | 1   | 1798  | 182  | 1193  | 233  | 0.00186 | -1.51 | CD47 antigen (Rh-related antigen, integrin-associated signal transducer) |
| Mapkapk5 | NM_010765 | Mm.272206 | 1   | 1565  | 213  | 2354  | 352  | 0.00367 | 1.5   | MAP kinase-activated protein kinase 5                                    |
| Sh2b1    | NM_011363 | Mm.8538   | 1   | 1016  | 128  | 1556  | 151  | 0.0003  | 1.53  | SH2-B PH domain containing signaling mediator 1                          |
| Rtkn     | BC013820  | Mm.4139   | 0.8 | 325   | 93   | 501   | 50   | 0.00994 | 1.54  | rhotekin                                                                 |
| Cap2     | AV261931  | Mm.44529  | 1   | 5171  | 462  | 7969  | 596  | 0.00003 | 1.54  | CAP, adenylate cyclase-associated protein, 2 (yeast)                     |
| Scye1    | NM_007926 | Mm.10507  | 1   | 3046  | 218  | 4737  | 376  | 0.00013 | 1.56  | small inducible cytokine subfamily E, member 1                           |
| Lgals1   | AI642438  | Mm.43831  | 1   | 13692 | 2632 | 22136 | 4234 | 0.00683 | 1.62  | lectin, galactose binding, soluble 1                                     |
| Lgals1   | NM_008495 | Mm.43831  | 1   | 13703 | 1954 | 22344 | 3128 | 0.0012  | 1.63  | lectin, galactose binding, soluble 1                                     |
| Dusp10   | NM_022019 | Mm.266191 | 1   | 1351  | 258  | 2255  | 586  | 0.01977 | 1.67  | dual specificity phosphatase 10                                          |
| Lims1    | BM213930  | Mm.57734  | 1   | 2195  | 453  | 3721  | 836  | 0.01156 | 1.69  | LIM and senescent cell antigen-like domains 1                            |
| Lims1    | BC005621  | Mm.57734  | 1   | 543   | 169  | 924   | 294  | 0.04584 | 1.7   | LIM and senescent cell antigen-like domains 1                            |
| Lbcl1    | AF177032  | Mm.239329 | 0.7 | 440   | 163  | 762   | 95   | 0.00901 | 1.73  | lymphoid blast crisis-like 1                                             |
| Cap2     | AK014979  | Mm.44529  | 1   | 3347  | 505  | 6135  | 1012 | 0.0015  | 1.83  | CAP, adenylate cyclase-associated protein, 2 (yeast)                     |
| Asb15    | NM_080847 | Mm.160150 | 1   | 756   | 410  | 1760  | 232  | 0.00313 | 2.33  | ankyrin repeat and SOCS box-containing protein 15                        |
| Opn1mw   | NM_008106 | Mm.284825 | 0.8 | 335   | 217  | 1369  | 589  | 0.01431 | 4.08  | opsin 1, medium-wave-sensitive                                           |

#### POST-TRANSLATIONAL MODIFICATION

| GeneSymbol | Genbank   | Unigene   | A/P | Ctl Mean | Ctl stdev | Exp Mean | Exp stdev | P-value | Fold Change | Gene Description                                                  |
|------------|-----------|-----------|-----|----------|-----------|----------|-----------|---------|-------------|-------------------------------------------------------------------|
| Sgk        | NM_011361 | Mm.28405  | 1   | 6132     | 1446      | 3063     | 1368      | 0.00874 | -2          | serum/gluocorticoid regulated kinase                              |
| Temt       | NM_009349 | Mm.299    | 1   | 7871     | 2082      | 3937     | 1082      | 0.00955 | -2          | thioether S-methyltransferase                                     |
| Chuk       | BC018243  | Mm.3996   | 1   | 353      | 75        | 206      | 53        | 0.00944 | -1.71       | conserved helix-loop-helix ubiquitous kinase                      |
| Vrk1       | BC016676  | Mm.2981   | 1   | 195      | 35        | 115      | 49        | 0.02182 | -1.69       | vaccinia related kinase 1                                         |
| Ptp1b      | NM_023587 | Mm.27286  | 1   | 2498     | 634       | 1565     | 293       | 0.02452 | -1.6        | protein tyrosine phosphatase-like, member b                       |
| Pftk1      | NM_011074 | Mm.6456   | 1   | 369      | 57        | 233      | 83        | 0.01966 | -1.58       | PPTAIRE protein kinase 1                                          |
| Lox        | NM_010728 | Mm.172    | 1   | 2372     | 484       | 1533     | 109       | 0.01956 | -1.55       | lysyl oxidase                                                     |
| Snrk       | NM_133741 | Mm.257989 | 1   | 3837     | 390       | 2485     | 496       | 0.00137 | -1.54       | SNF-1 related kinase                                              |
| Stk23      | NM_019684 | Mm.111904 | 1   | 759      | 87        | 1143     | 140       | 0.00124 | 1.51        | serine/threonine kinase 23                                        |
| Ppp5c      | BC003744  | Mm.3294   | 1   | 1084     | 386       | 1635     | 131       | 0.02945 | 1.51        | protein phosphatase 5, catalytic subunit                          |
| Tnk2       | NM_016788 | Mm.256734 | 1   | 1459     | 442       | 2225     | 359       | 0.01701 | 1.52        | tyrosine kinase, non-receptor, 2                                  |
| Pstpip2    | AV229693  | Mm.57174  | 1   | 2158     | 133       | 3284     | 611       | 0.01586 | 1.52        | proline-serine-threonine phosphatase-interacting protein 2        |
| Dm15       | AW108486  | Mm.301960 | 1   | 4489     | 989       | 6862     | 1667      | 0.02907 | 1.53        | dystrophin myotonic-protein kinase                                |
| Ppp1r11    | AW494322  | Mm.105324 | 1   | 234      | 71        | 362      | 73        | 0.02359 | 1.55        | protein phosphatase 1, regulatory (inhibitor) subunit 11          |
| Fastk      | NM_023229 | Mm.28123  | 1   | 2378     | 745       | 3702     | 130       | 0.01734 | 1.56        | Fas-activated serine/threonine kinase                             |
| Dapk3      | AI642212  | Mm.10294  | 1   | 616      | 197       | 962      | 65        | 0.01392 | 1.56        | death-associated kinase 3                                         |
| Thop1      | NM_022653 | Mm.26995  | 1   | 485      | 169       | 761      | 114       | 0.01963 | 1.57        | thimet oligopeptidase 1                                           |
| Map3k7     | AW547374  | Mm.258589 | 1   | 1024     | 149       | 1613     | 117       | 0.00012 | 1.58        | mitogen activated protein kinase kinase kinase 7                  |
| Srpk2      | BG805074  | Mm.8709   | 1   | 266      | 117       | 430      | 106       | 0.04906 | 1.62        | serine/arginine-rich protein specific kinase 2                    |
| Map3k12    | BB370469  | Mm.172897 | 1   | 146      | 41        | 242      | 68        | 0.03174 | 1.65        | mitogen activated protein kinase kinase kinase 12                 |
| Dyrk1b     | NM_010092 | Mm.57249  | 1   | 1247     | 369       | 2185     | 396       | 0.00475 | 1.75        | dual-specificity tyrosine-(Y)-phosphorylation regulated kinase 1b |
| Mknk2      | NM_021462 | Mm.42126  | 1   | 4683     | 2804      | 8587     | 1964      | 0.0381  | 1.83        | MAP kinase-interacting serine/threonine kinase 2                  |
| Camk2g     | BM227770  | Mm.235182 | 1   | 3187     | 885       | 5867     | 737       | 0.00082 | 1.84        | calcium/calmodulin-dependent protein kinase (CaM kinase) II gamma |
| Map3k7     | C87327    | Mm.258589 | 1   | 165      | 56        | 305      | 96        | 0.03088 | 1.85        | mitogen activated protein kinase kinase kinase 7                  |
| Art1       | NM_009710 | Mm.261071 | 1   | 7403     | 1352      | 13798    | 1796      | 0.00038 | 1.86        | ADP-ribosyltransferase 1                                          |
| Srpk2      | BG805074  | Mm.8709   | 1   | 148      | 50        | 282      | 91        | 0.02911 | 1.9         | serine/arginine-rich protein specific kinase 2                    |
| Ppp2r5b    | BB080065  | Mm.118076 | 1   | 410      | 98        | 825      | 96        | 0.00015 | 2.01        | protein phosphatase 2, regulatory subunit B (B56), beta isoform   |
| Apeg1      | AF215896  | Mm.275397 | 1   | 658      | 254       | 1344     | 424       | 0.01735 | 2.04        | aortic preferentially expressed gene 1                            |

#### SMALL GTPase MEDIATED SIGNAL TRANSDUCTION

| GeneSymbol | Genbank | Unigene | A/P | Ctl Mean | Ctl stdev | Exp Mean | Exp stdev | P-value | Fold Change | Gene Description |
|------------|---------|---------|-----|----------|-----------|----------|-----------|---------|-------------|------------------|
|------------|---------|---------|-----|----------|-----------|----------|-----------|---------|-------------|------------------|

|          |           |           |     |      |     |      |     |         |       |                                                                        |
|----------|-----------|-----------|-----|------|-----|------|-----|---------|-------|------------------------------------------------------------------------|
| Rasd1    | BB217136  | Mm.3903   | 0.6 | 767  | 258 | 386  | 81  | 0.0256  | -1.99 | RAS, dexamethasone-induced 1                                           |
| Ranbp2   | BM507707  | Mm.142730 | 1   | 1857 | 340 | 1062 | 144 | 0.00485 | -1.75 | RAN binding protein 2                                                  |
| Gnai1    | BQ174580  | Mm.297304 | 1   | 1734 | 550 | 1019 | 241 | 0.04491 | -1.7  | guanine nucleotide binding protein, alpha inhibiting 1                 |
| Cxcl12   | NM_013655 | Mm.465    | 1   | 3294 | 512 | 2056 | 132 | 0.00338 | -1.6  | chemokine (C-X-C motif) ligand 12                                      |
| Cdc42ep1 | BC016250  | Mm.30075  | 1   | 992  | 169 | 624  | 194 | 0.01292 | -1.59 | CDC42 effector protein (Rho GTPase binding) 1                          |
| Arhj     | AF309564  | Mm.27467  | 1   | 3043 | 722 | 1945 | 559 | 0.02767 | -1.56 | ras homolog gene family, member J                                      |
| Rab34    | AF327929  | Mm.275864 | 1   | 778  | 177 | 511  | 64  | 0.02494 | -1.52 | RAB34, member of RAS oncogene family                                   |
| Gnb1     | NM_008142 | Mm.2344   | 1   | 1132 | 149 | 746  | 119 | 0.00197 | -1.52 | guanine nucleotide binding protein (G protein), beta polypeptide 1     |
| Ywhaq    | AV124281  | Mm.289630 | 1   | 2154 | 316 | 1422 | 361 | 0.00926 | -1.51 | Y 3-monooxygenase/tryptophan 5-monooxygenase activation protein, theta |
| Nras     | BB018528  | Mm.256975 | 1   | 617  | 50  | 926  | 220 | 0.03801 | 1.5   | neuroblastoma RAS viral (v-ras) oncogene homolog                       |
| Arfgap3  | BG067878  | Mm.258910 | 0.8 | 355  | 54  | 553  | 74  | 0.00197 | 1.55  | ADP-ribosylation factor GTPase activating protein 3                    |
| Rab13    | BC027214  | Mm.29355  | 1   | 968  | 62  | 1556 | 325 | 0.01654 | 1.61  | RAB13, member RAS oncogene family                                      |
| Tbc1d1   | BC004675  | Mm.286353 | 1   | 909  | 337 | 1481 | 139 | 0.01717 | 1.63  | TBC1 domain family, member 1                                           |
| Rgs1     | NM_015811 | Mm.103701 | 0.6 | 152  | 31  | 252  | 32  | 0.00112 | 1.66  | regulator of G-protein signaling 1                                     |
| Siah2    | BY008407  | Mm.2847   | 0.5 | 658  | 94  | 1138 | 185 | 0.00211 | 1.73  | seven in absentia 2                                                    |
| Rab40b   | AV364488  | Mm.281639 | 1   | 249  | 39  | 609  | 120 | 0.00141 | 2.45  | Rab40b, member RAS oncogene family                                     |

#### MITOCHONDRIAL

| GeneSymbol | Genbank   | Unigene   | A/P | Ctl Mean | Ctl stdev | Exp Mean | Exp stdev | P-value | Fold Change | Gene Description                               |
|------------|-----------|-----------|-----|----------|-----------|----------|-----------|---------|-------------|------------------------------------------------|
| Nnt        | BB205930  | Mm.3842   | 1   | 908      | 314       | 513      | 126       | 0.04788 | -1.77       | nicotinamide nucleotide transhydrogenase       |
| Clpx       | BF020441  | Mm.30088  | 1   | 2481     | 438       | 1445     | 551       | 0.01108 | -1.72       | caseinolytic protease X (E.coli)               |
| Acaa2      | BB718075  | Mm.142498 | 1   | 3394     | 644       | 1981     | 475       | 0.00557 | -1.71       | acetyl-Coenzyme A acyltransferase 2            |
| Ndufs1     | AV256780  | Mm.265209 | 1   | 716      | 150       | 419      | 153       | 0.01479 | -1.71       | NADH dehydrogenase (ubiquinone) Fe-S protein 1 |
| Cox8a      | NM_007750 | Mm.14022  | 1   | 6139     | 1044      | 4085     | 1055      | 0.01482 | -1.5        | cytochrome c oxidase, subunit VIIIa            |

#### MEMBRANE

| GeneSymbol | Genbank   | Unigene   | A/P | Ctl Mean | Ctl stdev | Exp Mean | Exp stdev | P-value | Fold Change | Gene Description                                                              |
|------------|-----------|-----------|-----|----------|-----------|----------|-----------|---------|-------------|-------------------------------------------------------------------------------|
| Cyp4a14    | AI327006  | Mm.250901 | 1   | 350      | 206       | 59       | 40        | 0.03669 | -5.89       | cytochrome P450, family 4, subfamily a, polypeptide 14                        |
| Slc15a2    | NM_021301 | Mm.281804 | 1   | 1320     | 489       | 324      | 144       | 0.00731 | -4.07       | solute carrier family 15 (H+/peptide transporter), member 2                   |
| Eva        | BC015076  | Mm.33240  | 1   | 68       | 15        | 17       | 15        | 0.00101 | -3.83       | epithelial V-like antigen                                                     |
| Atp1a1     | BC025618  | Mm.280103 | 1   | 2507     | 819       | 1123     | 575       | 0.01753 | -2.23       | ATPase, Na+/K+ transporting, alpha 1 polypeptide                              |
| Slc1a3     | BB365275  | Mm.204834 | 1   | 292      | 78        | 144      | 71        | 0.01419 | -2.03       | solute carrier family 1 (glial high affinity glutamate transporter), member 3 |
| Sec61a1    | BC003707  | Mm.28375  | 1   | 747      | 242       | 378      | 221       | 0.03635 | -1.98       | Sec61 alpha 1 subunit (S. cerevisiae)                                         |
| Sdc2       | AI266824  | Mm.234266 | 1   | 696      | 265       | 355      | 148       | 0.04652 | -1.96       | syndecan 2                                                                    |
| Slco2a1    | NM_033314 | Mm.207106 | 1   | 238      | 79        | 124      | 52        | 0.0314  | -1.92       | solute carrier organic anion transporter family, member 2a1                   |
| G0s2       | NM_008059 | Mm.3283   | 1   | 1347     | 229       | 715      | 160       | 0.00148 | -1.88       | G0/G1 switch gene 2                                                           |
| Cldn5      | NM_013805 | Mm.22768  | 1   | 2967     | 783       | 1628     | 146       | 0.01989 | -1.82       | claudin 5                                                                     |
| Atp1a1     | BC025618  | Mm.280103 | 1   | 2089     | 703       | 1152     | 422       | 0.03776 | -1.81       | ATPase, Na+/K+ transporting, alpha 1 polypeptide                              |
| Mal        | NM_010762 | Mm.39040  | 1   | 403      | 95        | 224      | 133       | 0.04496 | -1.79       | myelin and lymphocyte protein, T-cell differentiation protein                 |
| Art3       | AJ311773  | Mm.263514 | 1   | 4146     | 1305      | 2335     | 604       | 0.03056 | -1.78       | ADP-ribosyltransferase 3                                                      |
| Elt1d1     | BC017134  | Mm.27242  | 1   | 1408     | 142       | 798      | 28        | 0.00071 | -1.77       | EGF, latrophilin seven transmembrane domain containing 1                      |
| Cyp2d22    | BF683039  | Mm.157435 | 1   | 1254     | 138       | 708      | 74        | 0.00024 | -1.77       | cytochrome P450, family 2, subfamily d, polypeptide 22                        |
| Sdpr       | BE197945  | Mm.255909 | 1   | 2645     | 370       | 1520     | 301       | 0.00076 | -1.74       | serum deprivation response                                                    |
| Slc12a4    | NM_009195 | Mm.292447 | 1   | 606      | 131       | 349      | 109       | 0.00972 | -1.74       | solute carrier family 12, member 4                                            |
| Mpp5       | AW258373  | Mm.30561  | 1   | 1738     | 515       | 1000     | 283       | 0.03095 | -1.74       | membrane protein, palmitoylated 5                                             |
| Abcb1b     | NM_011075 | Mm.146649 | 1   | 192      | 42        | 111      | 51        | 0.02683 | -1.72       | ATP-binding cassette, sub-family B (MDR/TAP), member 1B                       |
| Efnb2      | BB453355  | Mm.209813 | 1   | 435      | 143       | 253      | 66        | 0.04138 | -1.72       | ephrin B2                                                                     |
| Ar16ip6    | BC019550  | Mm.37623  | 1   | 309      | 59        | 179      | 61        | 0.00933 | -1.72       | ADP-ribosylation factor-like 6 interacting protein 6                          |
| Mpz        | BY229830  | Mm.9986   | 1   | 3331     | 1115      | 1951     | 545       | 0.04749 | -1.71       | myelin protein zero                                                           |
| Cdh5       | AW543698  | Mm.21767  | 1   | 3119     | 346       | 1833     | 172       | 0.0003  | -1.7        | cadherin 5                                                                    |
| Abcb1a     | M30697    | Mm.16086  | 1   | 351      | 96        | 208      | 54        | 0.02797 | -1.69       | ATP-binding cassette, sub-family B (MDR/TAP), member 1A                       |
| Fxyd6      | AB032010  | Mm.208287 | 1   | 1635     | 247       | 975      | 84        | 0.00241 | -1.68       | FXD domain-containing ion transport regulator 6                               |
| Elt1d1     | NM_133222 | Mm.27242  | 1   | 2112     | 395       | 1275     | 152       | 0.0069  | -1.66       | EGF, latrophilin seven transmembrane domain containing 1                      |
| Kcnj8      | NM_008428 | Mm.1482   | 1   | 1226     | 272       | 749      | 74        | 0.013   | -1.63       | potassium inwardly-rectifying channel, subfamily J, member 8                  |
| Elov5      | NM_134255 | Mm.19130  | 1   | 2482     | 425       | 1540     | 648       | 0.0299  | -1.61       | ELOVL family member 5, elongation of long chain fatty acids (yeast)           |
| Icam2      | NM_010494 | Mm.394    | 1   | 687      | 168       | 427      | 130       | 0.0263  | -1.61       | intercellular adhesion molecule 2                                             |
| Abcb1a     | BB819674  | Mm.16086  | 1   | 816      | 84        | 507      | 118       | 0.00208 | -1.61       | ATP-binding cassette, sub-family B (MDR/TAP), member 1A                       |
| Tm4sf3     | BC025461  | Mm.22270  | 1   | 3656     | 568       | 2291     | 538       | 0.00455 | -1.6        | transmembrane 4 superfamily member 3                                          |

|         |           |           |   |      |      |       |      |         |       |                                                                              |
|---------|-----------|-----------|---|------|------|-------|------|---------|-------|------------------------------------------------------------------------------|
| Kitl    | NM_013598 | Mm.45124  | 1 | 1566 | 390  | 990   | 277  | 0.0312  | -1.58 | kit ligand                                                                   |
| Cyp2f2  | NM_007817 | Mm.4515   | 1 | 942  | 238  | 595   | 85   | 0.02791 | -1.58 | cytochrome P450, family 2, subfamily f, polypeptide 2                        |
| Tjp1    | NM_009386 | Mm.4342   | 1 | 2251 | 430  | 1441  | 204  | 0.00899 | -1.56 | tight junction protein 1                                                     |
| Esam1   | AF361882  | Mm.41751  | 1 | 3415 | 142  | 2185  | 264  | 0.0001  | -1.56 | endothelial cell-specific adhesion molecule                                  |
| Lamp2   | NM_010685 | Mm.486    | 1 | 902  | 197  | 587   | 122  | 0.019   | -1.54 | lysosomal membrane glycoprotein 2                                            |
| Chodl   | AF311699  | Mm.77895  | 1 | 354  | 100  | 230   | 60   | 0.04959 | -1.54 | chondrolectin                                                                |
| Sdpr    | NM_138741 | Mm.255909 | 1 | 6017 | 1008 | 3962  | 768  | 0.00846 | -1.52 | serum deprivation response                                                   |
| Gpm6a   | BB348674  | Mm.241700 | 1 | 295  | 63   | 195   | 59   | 0.03285 | -1.52 | glycoprotein m6a                                                             |
| Trdn    | AF223416  | Mm.216837 | 1 | 618  | 50   | 945   | 167  | 0.00867 | 1.53  | triadin                                                                      |
| Sgcg    | NM_011892 | Mm.72173  | 1 | 4202 | 580  | 6582  | 692  | 0.00036 | 1.57  | sarcoglycan, gamma (dystrophin-associated glycoprotein)                      |
| Ttyh2   | BF585303  | Mm.271934 | 1 | 1065 | 146  | 1677  | 234  | 0.00166 | 1.57  | tweety homolog 2 (Drosophila)                                                |
| Bat5    | BG071718  | Mm.43745  | 1 | 4749 | 1199 | 7513  | 808  | 0.0037  | 1.58  | HLA-B associated transcript 5                                                |
| Vapb    | BB308907  | Mm.260456 | 1 | 689  | 138  | 1087  | 222  | 0.01162 | 1.58  | VAMP (vesicle-associated membrane protein)-associated protein B and C        |
| Cdh15   | NM_007662 | Mm.1976   | 1 | 735  | 48   | 1171  | 166  | 0.00248 | 1.59  | cadherin 15                                                                  |
| Scn1b   | BC009652  | Mm.1418   | 1 | 6936 | 1319 | 11058 | 1326 | 0.00116 | 1.59  | sodium channel, voltage-gated, type I, beta polypeptide                      |
| Bak1    | NM_007523 | Mm.2443   | 1 | 442  | 105  | 703   | 59   | 0.00287 | 1.59  | BCL2-antagonist/killer 1                                                     |
| Stx18   | AK007700  | Mm.18959  | 1 | 436  | 103  | 692   | 148  | 0.01568 | 1.59  | syntaxin 18                                                                  |
| Mg29    | NM_008596 | Mm.20942  | 1 | 2688 | 680  | 4298  | 487  | 0.00356 | 1.6   | mitsugumin 29                                                                |
| Rfng    | NM_009053 | Mm.871    | 1 | 692  | 150  | 1106  | 298  | 0.03215 | 1.6   | radical fringe gene homolog (Drosophila)                                     |
| Slc15a1 | NM_053079 | Mm.155618 | 1 | 72   | 21   | 120   | 28   | 0.01971 | 1.65  | solute carrier family 15 (oligopeptide transporter), member 1                |
| Napa    | NM_025898 | Mm.104540 | 1 | 524  | 91   | 869   | 136  | 0.00224 | 1.66  | N-ethylmaleimide sensitive fusion protein attachment protein alpha           |
| Kcnn1   | NM_032397 | Mm.32074  | 1 | 500  | 59   | 836   | 48   | 0.00001 | 1.67  | K intermediate/small conductance ca-activated channel, subfamily N, member 1 |
| Popdc3  | AA116404  | Mm.5290   | 1 | 2483 | 304  | 4242  | 491  | 0.00025 | 1.71  | popeye domain containing 3                                                   |
| Amigo   | BC022907  | Mm.275752 | 1 | 331  | 98   | 571   | 82   | 0.00304 | 1.72  | amphoterin induced gene and ORF                                              |
| Bat5    | BG071718  | Mm.43745  | 1 | 1272 | 559  | 2305  | 406  | 0.01243 | 1.81  | HLA-B associated transcript 5                                                |
| Kcna7   | NM_010596 | Mm.12955  | 1 | 2422 | 273  | 4499  | 431  | 0.00004 | 1.86  | potassium voltage-gated channel, shaker-related subfamily, member 7          |
| Extl3   | NM_018788 | Mm.103748 | 1 | 133  | 81   | 258   | 66   | 0.03013 | 1.93  | exostoses (multiple)-like 3                                                  |
| Jph2    | NM_021566 | Mm.34459  | 1 | 1381 | 563  | 2879  | 1162 | 0.04106 | 2.08  | junctophilin 2                                                               |
| Cacnb1  | BF165383  | Mm.41252  | 1 | 668  | 184  | 1415  | 136  | 0.00017 | 2.12  | calcium channel, voltage-dependent, beta 1 subunit                           |
| Cacng6  | AF361348  | Mm.219963 | 1 | 1185 | 598  | 3088  | 587  | 0.00096 | 2.61  | calcium channel, voltage-dependent, gamma subunit 6                          |
| Itmap1  | NM_008411 | Mm.142717 | 1 | 226  | 23   | 738   | 278  | 0.01475 | 3.27  | integral membrane-associated protein 1                                       |

#### NUCLEIC ACID BINDING

| GeneSymbol | Genbank   | Unigene   | A/P | Ctl Mean | Ctl stdev | Exp Mean | Exp stdev | P-value | Fold Change | Gene Description                                                         |
|------------|-----------|-----------|-----|----------|-----------|----------|-----------|---------|-------------|--------------------------------------------------------------------------|
| Prpf4b     | BB344827  | Mm.10027  | 1   | 411      | 92        | 191      | 86        | 0.00453 | -2.15       | PRP4 pre-mRNA processing factor 4 homolog B (yeast)                      |
| Hnrpu      | BB667237  | Mm.2115   | 1   | 629      | 189       | 301      | 69        | 0.01484 | -2.09       | heterogeneous nuclear ribonucleoprotein U (scaffold attachment factor A) |
| Eif4e13    | BM120823  | Mm.227183 | 1   | 560      | 137       | 269      | 81        | 0.0047  | -2.08       | eukaryotic translation initiation factor 4E like 3                       |
| Hnrpa1     | BE685966  | Mm.237064 | 1   | 143      | 12        | 70       | 41        | 0.01265 | -2.04       | heterogeneous nuclear ribonucleoprotein A1                               |
| Hnrph1     | NM_021510 | Mm.21740  | 1   | 3994     | 760       | 2174     | 379       | 0.00303 | -1.84       | heterogeneous nuclear ribonucleoprotein H1                               |
| Prpf4b     | BB344827  | Mm.10027  | 1   | 375      | 93        | 207      | 62        | 0.01226 | -1.81       | PRP4 pre-mRNA processing factor 4 homolog B (yeast)                      |
| Sfrs1      | BG071935  | Mm.45645  | 1   | 1146     | 287       | 658      | 95        | 0.01562 | -1.74       | splicing factor, arginine/serine-rich 1 (ASF/SF2)                        |
| Sfrs1      | BF147037  | Mm.45645  | 1   | 1023     | 303       | 611      | 83        | 0.03287 | -1.67       | splicing factor, arginine/serine-rich 1 (ASF/SF2)                        |
| Sfrs1      | BM125059  | Mm.45645  | 1   | 823      | 128       | 505      | 153       | 0.00756 | -1.63       | splicing factor, arginine/serine-rich 1 (ASF/SF2)                        |
| Rbpms      | BG069460  | Mm.12436  | 1   | 749      | 89        | 466      | 56        | 0.00054 | -1.61       | RNA binding protein gene with multiple splicing                          |
| Carhsp1    | NM_025821 | Mm.142095 | 1   | 971      | 158       | 611      | 97        | 0.00348 | -1.59       | calcium regulated heat stable protein 1                                  |
| Sfrs1      | X66091    | Mm.45645  | 1   | 1471     | 346       | 931      | 64        | 0.02665 | -1.58       | splicing factor, arginine/serine-rich 1 (ASF/SF2)                        |
| Prpf8      | NM_138659 | Mm.3757   | 1   | 4111     | 618       | 2616     | 541       | 0.00361 | -1.57       | pre-mRNA processing factor 8                                             |
| Hnrpa2b1   | C88150    | Mm.155896 | 1   | 1241     | 294       | 788      | 113       | 0.02386 | -1.57       | heterogeneous nuclear ribonucleoprotein A2/B1                            |
| Sfrs1      | BF682801  | Mm.45645  | 1   | 1378     | 120       | 888      | 101       | 0.00012 | -1.55       | splicing factor, arginine/serine-rich 1 (ASF/SF2)                        |
| Akap1      | BG067335  | Mm.2969   | 1   | 1868     | 251       | 1218     | 107       | 0.00316 | -1.53       | A kinase (PRKA) anchor protein 1                                         |
| Sf3b1      | NM_031179 | Mm.279736 | 1   | 480      | 107       | 316      | 66        | 0.02283 | -1.52       | splicing factor 3b, subunit 1                                            |
| Son        | BM244966  | Mm.46401  | 1   | 700      | 102       | 460      | 35        | 0.00424 | -1.52       | Son cell proliferation protein                                           |
| Rev3l      | AB031049  | Mm.2167   | 1   | 1061     | 188       | 705      | 70        | 0.01081 | -1.5        | REV3-like, catalytic subunit of DNA polymerase zeta RAD54 like           |
| Pdcd2      | BI526195  | Mm.323    | 1   | 647      | 114       | 979      | 152       | 0.00594 | 1.51        | programmed cell death 2                                                  |
| Stau2      | AJ244015  | Mm.314307 | 1   | 1313     | 141       | 1988     | 136       | 0.00006 | 1.51        | staufen, RNA binding protein, homolog 2                                  |
| Stau2      | BC025118  | Mm.216257 | 1   | 1618     | 327       | 2463     | 367       | 0.005   | 1.52        | staufen, RNA binding protein, homolog 2                                  |
| Fbl        | NM_007991 | Mm.4595   | 1   | 1423     | 277       | 2185     | 165       | 0.00116 | 1.54        | fibrillarlin                                                             |
| Hist2h2aa1 | BC010564  | Mm.261670 | 1   | 1970     | 341       | 3065     | 518       | 0.00554 | 1.56        | histone 2, H2aa1                                                         |
| Trim27     | NM_009054 | Mm.135689 | 1   | 1094     | 134       | 1766     | 219       | 0.00065 | 1.61        | tripartite motif protein 27                                              |



|            |           |           |   |       |      |       |      |         |      |                                                                        |
|------------|-----------|-----------|---|-------|------|-------|------|---------|------|------------------------------------------------------------------------|
| Trex1      | NM_011637 | Mm.262117 | 1 | 974   | 127  | 1567  | 243  | 0.00291 | 1.61 | three prime repair exonuclease 1                                       |
| Xrcc5      | AF166486  | Mm.246952 | 1 | 216   | 37   | 347   | 62   | 0.00504 | 1.61 | X-ray repair complementing defective repair in Chinese hamster cells 5 |
| Rnpc1      | NM_019547 | Mm.3865   | 1 | 3662  | 724  | 5981  | 791  | 0.0013  | 1.63 | RNA-binding region (RNP1, RRM) containing 1                            |
| Hist1h4i   | BC019757  | Mm.14775  | 1 | 839   | 236  | 1402  | 324  | 0.01652 | 1.67 | histone 1, H4i                                                         |
| Ddx18      | NM_025860 | Mm.44219  | 1 | 631   | 135  | 1072  | 285  | 0.02063 | 1.7  | DEAD (Asp-Glu-Ala-Asp) box polypeptide 18                              |
| Hist1h4h   | BC028550  | Mm.158272 | 1 | 840   | 196  | 1437  | 243  | 0.00273 | 1.71 | histone 1, H4h                                                         |
| Gadd45a    | NM_007836 | Mm.1236   | 1 | 905   | 448  | 1584  | 392  | 0.03428 | 1.75 | growth arrest and DNA-damage-inducible 45 alpha                        |
| Mettl3     | BB827491  | Mm.271759 | 1 | 501   | 148  | 879   | 180  | 0.00674 | 1.75 | methyltransferase-like 3                                               |
| Vars2      | AF087680  | Mm.28420  | 1 | 1106  | 258  | 1953  | 181  | 0.00054 | 1.77 | valyl-tRNA synthetase 2                                                |
| Apobec2    | NM_009694 | Mm.281793 | 1 | 12704 | 1398 | 23345 | 2928 | 0.00033 | 1.84 | apolipoprotein B editing complex 2                                     |
| Hist1h3a   | NM_013550 | Mm.221301 | 1 | 3125  | 1146 | 5784  | 1195 | 0.00709 | 1.85 | histone 1, H3a                                                         |
| Apex1      | CA568142  | Mm.203    | 1 | 1357  | 359  | 2522  | 579  | 0.00655 | 1.86 | apurinic/aprimidinic endonuclease 1                                    |
| Ttll1      | BB251824  | Mm.235007 | 1 | 92    | 44   | 181   | 55   | 0.02347 | 1.97 | tubulin tyrosine ligase-like family, member 1                          |
| Hist2h2be  | NM_019469 | Mm.219680 | 1 | 1007  | 346  | 2056  | 362  | 0.00157 | 2.04 | histone 2, H2be                                                        |
| Hist2h2aa1 | BC015270  | Mm.261670 | 1 | 238   | 57   | 792   | 143  | 0.0005  | 3.32 | histone 2, H2ac                                                        |
| Dnase1     | BC014718  | Mm.239992 | 1 | 114   | 20   | 874   | 474  | 0.02324 | 7.64 | deoxyribonuclease I                                                    |

### PROTEIN CATABOLISM

| GeneSymbol | Genbank   | Unigene    | A/P | Ctl Mean | Ctl stdev | Exp Mean | Exp stdev | P-value | Fold Change | Gene Description                                              |
|------------|-----------|------------|-----|----------|-----------|----------|-----------|---------|-------------|---------------------------------------------------------------|
| Hp         | NM_017370 | Mm.26730   | 1   | 1925     | 805       | 844      | 272       | 0.03618 | -2.28       | haptoglobin                                                   |
| Prss11     | NM_019564 | Mm.30156   | 1   | 3004     | 352       | 1407     | 348       | 0.00009 | -2.13       | protease, serine, 11 (Igf binding)                            |
| Prss11     | BB559067  | Mm.30156.2 | 1   | 1090     | 179       | 567      | 163       | 0.00132 | -1.92       | protease, serine, 11 (Igf binding)                            |
| Fgl2       | NM_008013 | Mm.292100  | 1   | 429      | 50        | 228      | 20        | 0.00042 | -1.88       | fibrinogen-like protein 2                                     |
| Psma1      | AV101011  | Mm.30097.2 | 1   | 131      | 40        | 72       | 16        | 0.03067 | -1.81       | proteasome (prosome, macropain) subunit, alpha type, 1        |
| Fbxo3      | CA567607  | Mm.143768  | 0.8 | 265      | 76        | 148      | 63        | 0.03003 | -1.78       | F-box only protein 3                                          |
| Enpep      | NM_007934 | Mm.1193    | 1   | 795      | 197       | 492      | 81        | 0.02452 | -1.62       | glutamyl aminopeptidase                                       |
| Casp6      | NM_009811 | Mm.281379  | 0.6 | 383      | 35        | 242      | 87        | 0.0207  | -1.58       | caspase 6                                                     |
| Adam15     | BB392633  | Mm.274049  | 1   | 2370     | 308       | 1506     | 178       | 0.00163 | -1.57       | a disintegrin and metalloproteinase domain 15 (metargidin)    |
| Naalad2    | NM_028279 | Mm.7060    | 1   | 552      | 113       | 362      | 89        | 0.0189  | -1.52       | N-acetylated alpha-linked acidic dipeptidase 2                |
| C1s        | BC022123  | Mm.24128   | 1   | 2520     | 690       | 1674     | 254       | 0.04988 | -1.51       | complement component 1, s subcomponent                        |
| Psmd4      | AB029146  | Mm.2261    | 1   | 3669     | 391       | 5576     | 347       | 0.00004 | 1.52        | proteasome (prosome, macropain) 26S subunit, non-ATPase, 4    |
| Agtppbp1   | NM_023328 | Mm.153008  | 1   | 339      | 135       | 534      | 81        | 0.02846 | 1.57        | ATP/GTP binding protein 1                                     |
| Serpinb6a  | NM_009254 | Mm.252210  | 1   | 8424     | 1226      | 13942    | 1905      | 0.00096 | 1.66        | serine (or cysteine) proteinase inhibitor, clade B, member 6a |
| Usp20      | BC019735  | Mm.209761  | 1   | 555      | 168       | 960      | 260       | 0.02239 | 1.73        | ubiquitin specific protease 20                                |
| Agtppbp1   | AK015394  | Mm.153008  | 0.8 | 197      | 66        | 402      | 84        | 0.00275 | 2.04        | ATP/GTP binding protein 1                                     |
| Fbxo17     | NM_015796 | Mm.88535   | 0.8 | 204      | 81        | 450      | 94        | 0.00226 | 2.2         | F-box only protein 17                                         |

### MISCELLANEOUS

| GeneSymbol   | Genbank   | Unigene   | A/P | Ctl Mean | Ctl stdev | Exp Mean | Exp stdev | P-value | Fold Change | Gene Description                                                     |
|--------------|-----------|-----------|-----|----------|-----------|----------|-----------|---------|-------------|----------------------------------------------------------------------|
| Mup1         | NM_031188 | Mm.237772 | 1   | 24715    | 12561     | 4266     | 4943      | 0.01952 | -5.79       | major urinary protein 1                                              |
| Cp           | NM_007752 | Mm.13787  | 1   | 482      | 184       | 193      | 89        | 0.02002 | -2.49       | ceruloplasmin                                                        |
| Lox          | M65143    | Mm.172    | 1   | 2110     | 498       | 859      | 161       | 0.0031  | -2.45       | lysyl oxidase                                                        |
| Egfl7        | BC024610  | Mm.268933 | 1   | 2027     | 260       | 841      | 191       | 0.00008 | -2.41       | EGF-like-domain, multiple 7                                          |
| Sncg         | NM_011430 | Mm.282800 | 1   | 1906     | 695       | 807      | 268       | 0.02155 | -2.36       | synuclein, gamma                                                     |
| Rbp4         | U63146    | Mm.2605   | 1   | 2393     | 785       | 1081     | 321       | 0.01814 | -2.21       | retinol binding protein 4, plasma                                    |
| Fsp27        | BB221402  | Mm.10026  | 1   | 4113     | 850       | 1904     | 730       | 0.00227 | -2.16       | fat specific gene 27                                                 |
| Ptgs1        | AA833146  | Mm.290010 | 0.8 | 166      | 33        | 79       | 50        | 0.01458 | -2.1        | prostaglandin-endoperoxide synthase 1                                |
| Gja1         | BC006894  | Mm.4504   | 1   | 533      | 101       | 258      | 99        | 0.00257 | -2.06       | gap junction membrane channel protein alpha 1                        |
| Mbp          | BB761376  | Mm.252063 | 1   | 2044     | 274       | 991      | 274       | 0.0003  | -2.06       | myelin basic protein                                                 |
| Tna          | NM_011606 | Mm.34588  | 1   | 1775     | 674       | 881      | 229       | 0.03766 | -2.01       | tetranectin (plasminogen binding protein)                            |
| Cda08-pendin | AW554709  | Mm.300723 | 1   | 517      | 111       | 257      | 73        | 0.0033  | -2.01       | T-cell immunomodulatory protein                                      |
| Trf          | AF440692  | Mm.37214  | 1   | 4943     | 1243      | 2493     | 911       | 0.00931 | -1.98       | transferrin                                                          |
| Sema3b       | NM_009153 | Mm.4083   | 0.6 | 513      | 136       | 267      | 74        | 0.01228 | -1.92       | sema domain, immunoglobulin domain, short basic domain, secreted, 3B |
| Palmd        | NM_023245 | Mm.331326 | 1   | 1197     | 206       | 627      | 80        | 0.00221 | -1.91       | palmdelphin                                                          |
| Gas1         | CA772806  | Mm.22701  | 1   | 2265     | 160       | 1245     | 273       | 0.00036 | -1.82       | growth arrest specific 1                                             |
| Sdccag33     | AV291373  | Mm.102136 | 1   | 659      | 44        | 362      | 63        | 0.00006 | -1.82       | serologically defined colon cancer antigen 33                        |
| Utx          | AJ002730  | Mm.257498 | 1   | 517      | 116       | 283      | 97        | 0.00889 | -1.82       | ubiquitously transcribed tetratricopeptide repeat gene, Y chromosome |
| Ppil4        | BC004652  | Mm.38927  | 1   | 449      | 74        | 248      | 141       | 0.03099 | -1.81       | peptidylprolyl isomerase (cyclophilin)-like 4                        |

|          |           |           |     |       |      |       |      |         |       |                                                                           |
|----------|-----------|-----------|-----|-------|------|-------|------|---------|-------|---------------------------------------------------------------------------|
| Mbp      | AV328388  | Mm.2992   | 1   | 1991  | 290  | 1100  | 408  | 0.00536 | -1.81 | myelin basic protein                                                      |
| Ccnl2    | AK008585  | Mm.23492  | 1   | 710   | 72   | 395   | 130  | 0.00326 | -1.8  | cyclin L2                                                                 |
| Idb4     | W77144    | Mm.283273 | 1   | 266   | 70   | 149   | 42   | 0.01572 | -1.78 | inhibitor of DNA binding 4                                                |
| Mbp      | AI323506  | Mm.252063 | 1   | 4450  | 781  | 2501  | 570  | 0.00279 | -1.78 | myelin basic protein                                                      |
| Dstn     | NM_019771 | Mm.28919  | 1   | 3061  | 201  | 1771  | 440  | 0.001   | -1.73 | destrin                                                                   |
| Hrb      | AF057287  | Mm.6461   | 1   | 970   | 106  | 564   | 92   | 0.0002  | -1.72 | HIV-1 Rev binding protein                                                 |
| Htf9c    | NM_008307 | Mm.271798 | 1   | 858   | 235  | 501   | 224  | 0.03971 | -1.71 | HpaII tiny fragments locus 9c                                             |
| Thbs4    | NM_011582 | Mm.20865  | 1   | 4121  | 391  | 2404  | 305  | 0.00006 | -1.71 | thrombospondin 4                                                          |
| Amot     | BG067039  | Mm.100068 | 1   | 1781  | 487  | 1049  | 223  | 0.02245 | -1.7  | angiomin                                                                  |
| CRG-L1   | AF282864  | Mm.45019  | 1   | 1163  | 76   | 687   | 70   | 0.00001 | -1.69 | cancer related gene-liver 1                                               |
| Gas1     | NM_008086 | Mm.22701  | 1   | 2401  | 530  | 1431  | 428  | 0.01302 | -1.68 | growth arrest specific 1                                                  |
| Atp1b1   | NM_009721 | Mm.4550   | 1   | 4583  | 792  | 2748  | 453  | 0.00414 | -1.67 | ATPase, Na+/K+ transporting, beta 1 polypeptide                           |
| Ss18     | NM_009280 | Mm.31761  | 1   | 2504  | 524  | 1502  | 435  | 0.01112 | -1.67 | synovial sarcoma translocation, chromosome 18                             |
| Fmo5     | NM_010232 | Mm.281718 | 1   | 264   | 47   | 158   | 19   | 0.00544 | -1.67 | flavin containing monoxygenase 5                                          |
| Psg28    | AF113598  | Mm.298482 | 1   | 339   | 57   | 203   | 53   | 0.0048  | -1.67 | pregnancy-specific glycoprotein 28                                        |
| Thoc1    | BC024951  | Mm.219648 | 1   | 177   | 51   | 107   | 39   | 0.04642 | -1.65 | THO complex 1                                                             |
| Cp       | NM_007752 | Mm.13787  | 1   | 883   | 80   | 537   | 97   | 0.00029 | -1.64 | ceruloplasmin                                                             |
| Pkp4     | AV286396  | Mm.260938 | 1   | 1549  | 120  | 945   | 185  | 0.00049 | -1.64 | plakophilin 4                                                             |
| Hrb      | CA748278  | Mm.6461   | 1   | 671   | 108  | 412   | 135  | 0.01026 | -1.63 | HIV-1 Rev binding protein                                                 |
| Atp1b1   | AV152334  | Mm.4550.6 | 1   | 5462  | 827  | 3342  | 344  | 0.00322 | -1.63 | ATPase, Na+/K+ transporting, beta 1 polypeptide                           |
| Topors   | BF018714  | Mm.251548 | 1   | 322   | 63   | 201   | 19   | 0.01002 | -1.6  | topoisomerase I binding, arginine/serine-rich                             |
| Stag1    | BQ174473  | Mm.42135  | 1   | 570   | 102  | 357   | 84   | 0.00693 | -1.6  | stromal antigen 1                                                         |
| Cp       | BY013791  | Mm.13787  | 1   | 477   | 115  | 301   | 71   | 0.02303 | -1.58 | ceruloplasmin                                                             |
| Ccnl2    | AK008585  | Mm.23492  | 1   | 2855  | 395  | 1824  | 193  | 0.00195 | -1.57 | cyclin L2                                                                 |
| Cxcl14   | AF252873  | Mm.30211  | 1   | 1229  | 243  | 784   | 156  | 0.01081 | -1.57 | chemokine (C-X-C motif) ligand 14                                         |
| Ndr1     | AV309418  | Mm.4063   | 1   | 1370  | 352  | 877   | 218  | 0.03251 | -1.56 | N-myc downstream regulated 1                                              |
| Gopc     | BI659593  | Mm.155704 | 1   | 534   | 89   | 345   | 26   | 0.00618 | -1.55 | golgi associated PDZ and coiled-coil motif containing, syntaxin-6 binding |
| Fign     | NM_021716 | Mm.130769 | 0.5 | 203   | 15   | 131   | 41   | 0.01476 | -1.55 | fidgetin                                                                  |
| Atp1b1   | CA578185  | Mm.4550   | 1   | 6986  | 767  | 4528  | 418  | 0.00076 | -1.54 | ATPase, Na+/K+ transporting, beta 1 polypeptide                           |
| Ctla2a   | NM_007796 | Mm.30144  | 1   | 2091  | 392  | 1359  | 162  | 0.012   | -1.54 | cytotoxic T lymphocyte-associated protein 2 alpha                         |
| Ndr1     | AI790290  | Mm.30837  | 1   | 1975  | 315  | 1290  | 263  | 0.00584 | -1.53 | N-myc downstream regulated 1                                              |
| Rgl1     | NM_016846 | Mm.245270 | 1   | 324   | 65   | 212   | 43   | 0.01577 | -1.52 | ral guanine nucleotide dissociation stimulator-like 1                     |
| Ian6     | BB667753  | Mm.24781  | 1   | 884   | 226  | 585   | 153  | 0.04494 | -1.51 | immune associated nucleotide 6                                            |
| Catnd2   | NM_008729 | Mm.6680   | 0.8 | 81    | 10   | 123   | 23   | 0.0117  | 1.51  | catenin delta 2                                                           |
| Jtv1     | BC026972  | Mm.200499 | 1   | 5794  | 649  | 8724  | 1619 | 0.01322 | 1.51  | JTV1 gene                                                                 |
| Eif2b4   | NM_010122 | Mm.29394  | 1   | 2710  | 344  | 4130  | 439  | 0.00046 | 1.52  | eukaryotic translation initiation factor 2B, subunit 4 delta              |
| Hcfc1r1  | BF580567  | Mm.270281 | 1   | 4066  | 647  | 6240  | 1062 | 0.00585 | 1.53  | host cell factor C1 regulator 1 (XPO1-dependent)                          |
| Unc119   | BC001990  | Mm.284811 | 0.8 | 463   | 66   | 711   | 138  | 0.01103 | 1.54  | unc-119 homolog (C. elegans)                                              |
| Tpd52l1  | NM_009413 | Mm.7821   | 1   | 556   | 131  | 856   | 173  | 0.01802 | 1.54  | tumor protein D52-like 1                                                  |
| Tcof1    | AW209012  | Mm.2215   | 1   | 666   | 70   | 1024  | 268  | 0.03413 | 1.54  | Treacher Collins Franceschetti syndrome 1, homolog                        |
| Hgs      | BC003239  | Mm.7919   | 1   | 2921  | 219  | 4519  | 810  | 0.00805 | 1.55  | HGF-regulated tyrosine kinase substrate                                   |
| Tgm2     | BC016492  | Mm.330731 | 1   | 6308  | 934  | 9881  | 852  | 0.00023 | 1.57  | transglutaminase 2                                                        |
| Gas5     | NM_013525 | Mm.270065 | 1   | 4429  | 1120 | 7043  | 867  | 0.00332 | 1.59  | growth arrest specific 5                                                  |
| Nup62    | AV295214  | Mm.22687  | 0.9 | 692   | 117  | 1100  | 304  | 0.03798 | 1.59  | nucleoporin 62                                                            |
| Fbxw5    | NM_013908 | Mm.29170  | 1   | 946   | 205  | 1517  | 290  | 0.00886 | 1.6   | F-box and WD-40 domain protein 5                                          |
| Anxa6    | NM_013472 | Mm.265347 | 1   | 3729  | 463  | 6016  | 945  | 0.00284 | 1.61  | annexin A6                                                                |
| Nope     | NM_020043 | Mm.209041 | 1   | 509   | 33   | 821   | 144  | 0.00929 | 1.61  | neighbor of Punc E11                                                      |
| Tgm2     | AW321975  | Mm.18843  | 1   | 3258  | 576  | 5236  | 893  | 0.00425 | 1.61  | transglutaminase 2, C polypeptide                                         |
| Lynx1    | NM_011838 | Mm.257067 | 1   | 1845  | 386  | 2981  | 381  | 0.00158 | 1.62  | y6/neurotoxin 1                                                           |
| Plac1    | AF250838  | Mm.274842 | 0.8 | 268   | 79   | 436   | 125  | 0.04005 | 1.62  | placental specific protein 1                                              |
| Eif4ebp1 | AK013033  | Mm.6700   | 1   | 816   | 304  | 1329  | 230  | 0.01974 | 1.63  | eukaryotic translation initiation factor 4E binding protein 1             |
| Hspb7    | BM124741  | Mm.46181  | 1   | 10716 | 3668 | 17433 | 3401 | 0.017   | 1.63  | heat shock protein family, member 7 (cardiovascular)                      |
| Cyhr1    | NM_019396 | Mm.18561  | 1   | 907   | 236  | 1507  | 149  | 0.00199 | 1.66  | cysteine and histidine rich 1                                             |
| H19      | NM_023123 | Mm.14802  | 1   | 5627  | 738  | 9422  | 1351 | 0.0015  | 1.67  | H19 fetal liver mRNA                                                      |
| Mlf1     | AF100171  | Mm.10414  | 1   | 5716  | 1389 | 9518  | 721  | 0.00162 | 1.67  | myeloid leukemia factor 1                                                 |
| Lrba     | NM_030695 | Mm.239927 | 1   | 2478  | 472  | 4169  | 628  | 0.00195 | 1.68  | LPS-responsive beige-like anchor                                          |
| Hspb7    | BY000290  | Mm.46181  | 1   | 9232  | 5091 | 15599 | 3067 | 0.0478  | 1.69  | heat shock protein family, member 7 (cardiovascular)                      |
| Tcof1    | AW209012  | Mm.2215   | 1   | 223   | 51   | 384   | 93   | 0.01471 | 1.72  | Treacher Collins Franceschetti syndrome 1, homolog                        |
| Ldb3     | AF114378  | Mm.29733  | 1   | 4127  | 1041 | 7113  | 2189 | 0.03311 | 1.72  | LIM domain binding 3                                                      |
| Bklhd2   | NM_026167 | Mm.26546  | 1   | 112   | 18   | 194   | 35   | 0.0037  | 1.73  | kelch-like 13                                                             |

|        |           |           |     |      |      |       |      |         |      |                                                                       |
|--------|-----------|-----------|-----|------|------|-------|------|---------|------|-----------------------------------------------------------------------|
| Bin1   | U60884    | Mm.4383   | 1   | 9359 | 1192 | 16399 | 2273 | 0.00086 | 1.75 | bridging integrator 1                                                 |
| Ccng1  | BG065754  | Mm.2103   | 1   | 6821 | 517  | 12292 | 1959 | 0.00179 | 1.8  | cyclin G1                                                             |
| Serf1  | AA709993  | Mm.286177 | 1   | 81   | 19   | 146   | 24   | 0.00165 | 1.81 | small EDRK-rich factor 1                                              |
| Defb10 | AJ437645  | Mm.220170 | 1   | 172  | 59   | 315   | 78   | 0.01429 | 1.83 | defensin beta 10                                                      |
| Neurl  | AF401228  | Mm.329899 | 1   | 3652 | 362  | 6768  | 1110 | 0.00189 | 1.85 | neuronalized-like homolog                                             |
| Ptov1  | BG073526  | Mm.42855  | 1   | 2775 | 1485 | 5240  | 1794 | 0.04548 | 1.89 | prostate tumor over expressed gene 1                                  |
| Mllt1  | BG063049  | Mm.148748 | 0.6 | 498  | 217  | 948   | 123  | 0.00702 | 1.9  | myeloid/lymphoid or mixed lineage-leukemia translocation to 1 homolog |
| Spag5  | BM208112  | Mm.24250  | 1   | 169  | 29   | 332   | 61   | 0.00179 | 1.96 | sperm associated antigen 5                                            |
| Lgals2 | NM_025622 | Mm.26934  | 0.9 | 210  | 53   | 422   | 124  | 0.01721 | 2.01 | lectin, galactose-binding, soluble 2                                  |
| Rex3   | NM_009052 | Mm.14768  | 1   | 1686 | 506  | 3451  | 1179 | 0.02759 | 2.05 | reduced expression 3                                                  |
| Neurl  | AF400063  | Mm.329899 | 1   | 512  | 190  | 1080  | 349  | 0.01879 | 2.11 | neuronalized-like homolog                                             |
| Wdr10  | AV319292  | Mm.333335 | 1   | 350  | 56   | 745   | 118  | 0.00052 | 2.12 | WD repeat domain 10                                                   |
| Exo70  | BB749620  | Mm.22530  | 1   | 968  | 237  | 2166  | 321  | 0.00028 | 2.24 | exocyst component protein homolog (S. cerevisiae)                     |
| Ubc    | D50527    | Mm.331    | 1   | 1211 | 746  | 3113  | 1014 | 0.01183 | 2.57 | ubiquitin C                                                           |
| Cpne2  | BC023348  | Mm.291815 | 1   | 345  | 85   | 1423  | 788  | 0.03844 | 4.12 | copine II                                                             |
| Crip3  | AF367970  | Mm.25168  | 0.7 | 127  | 68   | 857   | 187  | 0.00045 | 6.74 | cysteine-rich protein 3                                               |

### UNKNOWN

| GeneSymbol   | Genbank   | Unigene    | A/P | Ctl Mean | Ctl stdev | Exp Mean | Exp stdev | P-value | Fold Change | Gene Description                                         |
|--------------|-----------|------------|-----|----------|-----------|----------|-----------|---------|-------------|----------------------------------------------------------|
| A930025J12Ri | BC027354  | Mm.260712  | 0.8 | 1262     | 655       | 319      | 468       | 0.03457 | -3.95       | null                                                     |
| BC018222     | BC026654  | Mm.31552   | 1   | 1104     | 468       | 379      | 161       | 0.02207 | -2.91       | cDNA sequence BC018222                                   |
| 0710001E19Ri | NM_029716 | Mm.257073  | 0.5 | 229      | 69        | 78       | 68        | 0.0089  | -2.9        | RIKEN cDNA 0710001E19 gene                               |
| AB023957     | NM_133237 | Mm.276268  | 1   | 555      | 166       | 228      | 85        | 0.00795 | -2.43       | cDNA sequence AB023957                                   |
| AI255170     | BE134496  | Mm.214973  | 0.8 | 603      | 209       | 251      | 130       | 0.01544 | -2.4        | expressed sequence AI255170                              |
| 1810057C19Ri | NM_026433 | Mm.212428  | 1   | 1330     | 454       | 581      | 95        | 0.02266 | -2.29       | RIKEN cDNA 1810057C19 gene                               |
| A230046K03Ri | BB387783  | Mm.278577  | 0.5 | 92       | 32        | 40       | 26        | 0.02448 | -2.29       | null                                                     |
| 1100001G20Ri | AV006463  | Mm.902     | 1   | 638      | 157       | 295      | 67        | 0.00655 | -2.16       | RIKEN cDNA 1100001G20 gene                               |
| 2610001E17Ri | BG074158  | Mm.181074  | 0.6 | 1171     | 346       | 545      | 244       | 0.01312 | -2.15       | RIKEN cDNA 2610001E17 gene                               |
| A830037N07Ri | BB752393  | Mm.259072  | 1   | 395      | 116       | 188      | 39        | 0.01312 | -2.1        | RIKEN cDNA A830037N07 gene                               |
| NULL         | AK002700  | Mm.17339.2 | 1   | 5168     | 1028      | 2500     | 872       | 0.00222 | -2.07       | null                                                     |
| AB023957     | NM_133237 | Mm.276268  | 0.8 | 464      | 186       | 225      | 83        | 0.03975 | -2.06       | cDNA sequence AB023957                                   |
| NULL         | AA223007  | NULL       | 1   | 420      | 85        | 205      | 83        | 0.0038  | -2.05       | null                                                     |
| NULL         | BI415208  | Mm.255066  | 0.8 | 497      | 84        | 243      | 99        | 0.0024  | -2.05       | null                                                     |
| B430320C24Ri | BG066982  | Mm.25259   | 1   | 917      | 354       | 454      | 152       | 0.04356 | -2.02       | Mus musculus 0 day neonate lung cDNA, clone:E030020K21   |
| A830037N07Ri | BB752393  | Mm.259072  | 1   | 426      | 125       | 215      | 103       | 0.02024 | -1.98       | RIKEN cDNA A830037N07 gene                               |
| 2210418I02Ri | AV370981  | Mm.73682   | 1   | 610      | 109       | 310      | 139       | 0.00541 | -1.97       | RIKEN cDNA 2210418I02 gene                               |
| 2310076L09Ri | BC024138  | Mm.254985  | 1   | 2389     | 565       | 1212     | 230       | 0.00764 | -1.97       | RIKEN cDNA 2310076L09 gene                               |
| 0610007L05Ri | BI328146  | Mm.28231   | 1   | 2312     | 537       | 1191     | 193       | 0.00714 | -1.94       | RIKEN cDNA 0610007L05 gene                               |
| 2610510D13Ri | BG518769  | Mm.268185  | 1   | 2459     | 560       | 1314     | 318       | 0.00736 | -1.87       | null                                                     |
| 0610007L05Ri | AV012073  | Mm.28231   | 1   | 1849     | 431       | 1000     | 260       | 0.00702 | -1.85       | null                                                     |
| C330016016Ri | BC025434  | Mm.156227  | 1   | 298      | 97        | 163      | 37        | 0.03412 | -1.83       | null                                                     |
| 5033405D03Ri | BB559878  | Mm.19352   | 1   | 3290     | 474       | 1801     | 422       | 0.00078 | -1.83       | RIKEN cDNA 5033405D03 gene                               |
| AI595338     | BM241485  | Mm.275893  | 1   | 914      | 222       | 499      | 228       | 0.01955 | -1.83       | expressed sequence AI595338                              |
| 2310075G12Ri | BC026740  | Mm.24635   | 0.7 | 1008     | 188       | 555      | 282       | 0.02054 | -1.81       | RIKEN cDNA 2310075G12 gene                               |
| NULL         | AV213552  | Mm.12001   | 0.8 | 623      | 214       | 346      | 111       | 0.04284 | -1.8        | null                                                     |
| BC013720     | BG066686  | Mm.301521  | 0.6 | 390      | 69        | 216      | 45        | 0.00219 | -1.8        | Mus musculus transcribed sequences                       |
| 3300001P08Ri | BC009092  | Mm.30927   | 1   | 1736     | 337       | 972      | 152       | 0.00365 | -1.79       | RIKEN cDNA 3300001P08 gene                               |
| 6720480D16Ri | BB329288  | Mm.296036  | 1   | 312      | 78        | 174      | 81        | 0.02541 | -1.79       | null                                                     |
| A230075M04Ri | AV246615  | Mm.24003   | 1   | 2316     | 355       | 1301     | 394       | 0.00268 | -1.78       | Mus musculus 13 days embryo heart cDNA, clone:D330042I16 |
| 2310039E09Ri | NM_026509 | Mm.133444  | 1   | 6461     | 1185      | 3641     | 299       | 0.0036  | -1.77       | RIKEN cDNA 2310039E09 gene                               |
| 2310043N10Ri | AK018202  | Mm.281895  | 1   | 19465    | 3364      | 11122    | 2704      | 0.00254 | -1.75       | Mus musculus adult male cecum cDNA, clone:9130009H04     |
| E030006K04Ri | AI851258  | Mm.247642  | 1   | 741      | 181       | 424      | 111       | 0.01269 | -1.75       | RIKEN cDNA E030006K04 gene                               |
| 1810044O22Ri | BM934224  | Mm.20242   | 1   | 1691     | 233       | 973      | 295       | 0.00276 | -1.74       | RIKEN cDNA 1810044O22 gene                               |
| 1110001A05Ri | NM_019808 | Mm.117709  | 1   | 231      | 66        | 133      | 41        | 0.02627 | -1.74       | RIKEN cDNA 1110001A05 gene                               |
| R75183       | BC004774  | Mm.295397  | 1   | 1170     | 325       | 677      | 200       | 0.02358 | -1.73       | expressed sequence R75183                                |
| 2210404N08Ri | BC026453  | Mm.34874   | 1   | 707      | 83        | 409      | 73        | 0.00033 | -1.73       | RIKEN cDNA 2210404N08 gene                               |
| 2610001E17Ri | AB075019  | Mm.181074  | 1   | 4819     | 1190      | 2803     | 61        | 0.01938 | -1.72       | RIKEN cDNA 2610001E17 gene                               |
| 2410018G23Ri | CA574035  | Mm.28626   | 1   | 1020     | 189       | 598      | 139       | 0.00516 | -1.7        | RIKEN cDNA 2410018G23 gene                               |
| 6330415F13Ri | BC007185  | Mm.27469   | 1   | 786      | 233       | 464      | 64        | 0.03116 | -1.69       | RIKEN cDNA 6330415F13 gene                               |

|              |           |            |     |      |      |      |     |         |       |                                                                        |
|--------------|-----------|------------|-----|------|------|------|-----|---------|-------|------------------------------------------------------------------------|
| NULL         | BC023373  | Mm.50809   | 1   | 1542 | 297  | 914  | 188 | 0.00528 | -1.69 | Mus musculus 13 days embryo male testis, clone:6030482D04 product:CDT6 |
| 1110048B16Ri | BB364488  | Mm.4948    | 1   | 2487 | 650  | 1470 | 700 | 0.0446  | -1.69 | forkhead box O3                                                        |
| 6330415F13Ri | AV234585  | Mm.27469   | 1   | 361  | 83   | 215  | 63  | 0.01674 | -1.68 | RIKEN cDNA 6330415F13 gene                                             |
| 3222402P14Ri | BB376997  | Mm.129981  | 1   | 1211 | 226  | 728  | 115 | 0.00538 | -1.66 | null                                                                   |
| AA959601     | AA410148  | Mm.24477   | 1   | 880  | 197  | 529  | 51  | 0.01212 | -1.66 | DNA segment, Chr 14, Wayne State University 89, expressed              |
| 4632428N05Ri | NM_028732 | Mm.273584  | 1   | 791  | 158  | 478  | 142 | 0.01094 | -1.65 | RIKEN cDNA 4632428N05 gene                                             |
| D4Wsu53e     | NM_023665 | Mm.331964  | 1   | 4214 | 827  | 2559 | 883 | 0.01568 | -1.65 | Mus musculus transcribed sequence                                      |
| NULL         | AV036158  | Mm.2917    | 0.6 | 141  | 26   | 86   | 37  | 0.03045 | -1.65 | null                                                                   |
| 2610102K23Ri | BI965039  | Mm.294783  | 1   | 430  | 86   | 262  | 52  | 0.00756 | -1.64 | null                                                                   |
| 4921515A04Ri | BM119297  | Mm.3036    | 1   | 513  | 122  | 313  | 101 | 0.02263 | -1.64 | RIKEN cDNA 4921515A04 gene                                             |
| 0610013D04Ri | BG075321  | Mm.196330  | 1   | 744  | 139  | 452  | 89  | 0.00562 | -1.64 | RIKEN cDNA 0610013D04 gene                                             |
| NULL         | AV013785  | Mm.208618  | 0.6 | 253  | 29   | 155  | 60  | 0.01704 | -1.63 | Mus musculus, clone IMAGE:5028242, mRNA                                |
| A230106A15Ri | BG071079  | Mm.200220  | 1   | 677  | 97   | 414  | 72  | 0.00193 | -1.63 | Mus musculus adult male hypothalamus cDNA, clone:A230106A15            |
| MGC18894     | BC013479  | Mm.29110   | 1   | 727  | 182  | 447  | 141 | 0.02641 | -1.63 | hypothetical protein MGC18894                                          |
| 2700084L22Ri | NM_026024 | Mm.284587  | 1   | 195  | 45   | 120  | 36  | 0.02095 | -1.62 | RIKEN cDNA 2700084L22 gene                                             |
| 1200002N14Ri | BC021433  | Mm.35450   | 0.8 | 1074 | 309  | 662  | 128 | 0.04064 | -1.62 | RIKEN cDNA 1200002N14 gene                                             |
| C330005L02Ri | BB503267  | Mm.228067  | 1   | 1292 | 186  | 802  | 125 | 0.0018  | -1.61 | null                                                                   |
| AA959601     | BB795072  | Mm.24477   | 1   | 259  | 66   | 161  | 25  | 0.02665 | -1.61 | DNA segment, Chr 14, Wayne State University 89, expressed              |
| 1300013C10Ri | BM120233  | Mm.10281   | 1   | 683  | 158  | 428  | 134 | 0.02488 | -1.6  | RIKEN cDNA 1300013C10 gene                                             |
| 4930563P03Ri | AK016213  | Mm.10223   | 1   | 997  | 223  | 624  | 156 | 0.01834 | -1.6  | RIKEN cDNA 4930563P03 gene                                             |
| 2610510E10Ri | BG228848  | Mm.324474  | 1   | 1251 | 288  | 780  | 143 | 0.0169  | -1.6  | Mus musculus transcribed sequence                                      |
| 3110006P09Ri | AW536850  | Mm.3035    | 1   | 1249 | 155  | 788  | 220 | 0.00648 | -1.59 | RIKEN cDNA 3110006P09 gene                                             |
| 2810429C13Ri | BC007170  | Mm.259893  | 1   | 283  | 50   | 178  | 51  | 0.01136 | -1.59 | RIKEN cDNA 2810429C13 gene                                             |
| 9130005N23Ri | AA201054  | Mm.22541   | 0.8 | 181  | 46   | 114  | 20  | 0.02624 | -1.59 | RIKEN cDNA 9130005N23 gene                                             |
| AW111922     | NM_021792 | Mm.261140  | 1   | 367  | 105  | 231  | 62  | 0.0467  | -1.59 | null                                                                   |
| C330007P06Ri | BC021479  | Mm.290704  | 1   | 986  | 195  | 622  | 97  | 0.00974 | -1.59 | RIKEN cDNA C330007P06 gene                                             |
| A530016L24Ri | BC026527  | Mm.185209  | 0.5 | 279  | 70   | 175  | 51  | 0.03154 | -1.59 | RIKEN cDNA A530016L24 gene                                             |
| BC013529     | BC013529  | Mm.33716   | 1   | 2296 | 661  | 1449 | 249 | 0.0439  | -1.58 | cDNA sequence BC013529                                                 |
| 2810055F11Ri | BC004753  | Mm.286120  | 1   | 248  | 40   | 157  | 30  | 0.00509 | -1.58 | RIKEN cDNA 2810055F11 gene                                             |
| 2310001A20Ri | AJ310638  | Mm.26599   | 1   | 1829 | 249  | 1160 | 240 | 0.00254 | -1.58 | RIKEN cDNA 2310001A20 gene                                             |
| 1300006L01Ri | AK018760  | Mm.33729   | 1   | 3986 | 787  | 2527 | 488 | 0.00972 | -1.58 | RIKEN cDNA 1300006L01 gene                                             |
| 1700017117Ri | BC016606  | Mm.150701  | 1   | 1270 | 258  | 807  | 211 | 0.01465 | -1.57 | null                                                                   |
| BC022623     | BB008324  | Mm.28244   | 1   | 501  | 74   | 319  | 121 | 0.02422 | -1.57 | cDNA sequence BC022623                                                 |
| AU040950     | AF353717  | Mm.275054  | 1   | 4055 | 917  | 2582 | 238 | 0.01777 | -1.57 | expressed sequence AU040950                                            |
| 2610529H08Ri | AV227727  | Mm.258985  | 1   | 6505 | 1046 | 4160 | 279 | 0.00472 | -1.56 | RIKEN cDNA 2610529H08 gene                                             |
| 3100002M17Ri | BQ175470  | Mm.26017   | 1   | 304  | 72   | 195  | 74  | 0.04702 | -1.56 | RIKEN cDNA 3100002M17 gene                                             |
| 2310016C16Ri | BC019664  | Mm.12715   | 1   | 462  | 61   | 295  | 30  | 0.00161 | -1.56 | RIKEN cDNA 2310016C16 gene                                             |
| 4933425F03Ri | BC016096  | Mm.83840   | 1   | 5662 | 1271 | 3652 | 695 | 0.02111 | -1.55 | RIKEN cDNA 4933425F03 gene                                             |
| BC013667     | BC013667  | Mm.220901  | 1   | 507  | 115  | 327  | 85  | 0.02645 | -1.55 | null                                                                   |
| NULL         | AU018141  | NULL       | 1   | 3624 | 910  | 2357 | 371 | 0.03449 | -1.54 | null                                                                   |
| D730040F13Ri | AF031164  | Mm.296632  | 1   | 644  | 95   | 419  | 107 | 0.00816 | -1.54 | Mus musculus 12 days embryo spinal ganglion cDNA, clone:D130071L21     |
| AA959601     | BB795072  | Mm.24477   | 1   | 1253 | 179  | 816  | 41  | 0.00608 | -1.54 | DNA segment, Chr 14, Wayne State University 89, expressed              |
| AI316828     | D50523    | Mm.229654  | 1   | 1716 | 201  | 1118 | 133 | 0.00087 | -1.54 | null                                                                   |
| AI450757     | AV364671  | Mm.33908   | 1   | 742  | 135  | 486  | 76  | 0.01015 | -1.53 | expressed sequence AI450757                                            |
| AF424697     | AF424697  | Mm.281732  | 1   | 603  | 59   | 397  | 98  | 0.00509 | -1.52 | DNA sequence AF424697                                                  |
| 1200003E16Ri | AK004560  | Mm.27917   | 0.8 | 745  | 124  | 489  | 66  | 0.00655 | -1.52 | RIKEN cDNA 1200003E16 gene                                             |
| 9130017A15Ri | AI881989  | Mm.251661  | 1   | 6490 | 731  | 4266 | 270 | 0.0014  | -1.52 | Moderately similar to melanoma antigen, family D, 2; mage-d2 protein   |
| 1500005K14Ri | BG070087  | Mm.34131   | 0.7 | 1253 | 204  | 824  | 202 | 0.01033 | -1.52 | RIKEN cDNA 1500005K14 gene                                             |
| 7420700H20Ri | AK008756  | Mm.7381    | 1   | 558  | 98   | 368  | 82  | 0.01084 | -1.52 | RIKEN cDNA 7420700H20 gene                                             |
| 1110021N07Ri | AV310010  | Mm.289387  | 0.8 | 733  | 131  | 487  | 108 | 0.01219 | -1.51 | null                                                                   |
| NULL         | BE335796  | Mm.259200  | 1   | 714  | 106  | 475  | 94  | 0.00559 | -1.5  | null                                                                   |
| BC016423     | NM_134063 | Mm.221609  | 1   | 267  | 39   | 178  | 60  | 0.02925 | -1.5  | null                                                                   |
| 1300002A08Ri | NM_025827 | Mm.30092   | 1   | 1727 | 332  | 2597 | 386 | 0.00514 | 1.5   | RIKEN cDNA 1300002A08 gene                                             |
| 2310050L06Ri | BC021619  | Mm.27166   | 1   | 608  | 130  | 913  | 130 | 0.00607 | 1.5   | RIKEN cDNA 2310050L06 gene                                             |
| NULL         | AK009153  | Mm.220982  | 1   | 87   | 9    | 132  | 21  | 0.00776 | 1.51  | null                                                                   |
| 5730592L21Ri | AK017880  | Mm.292567  | 0.9 | 403  | 76   | 608  | 115 | 0.01315 | 1.51  | RIKEN cDNA 5730592L21 gene                                             |
| BC029157     | BY008172  | Mm.221271  | 0.7 | 672  | 278  | 1017 | 135 | 0.04767 | 1.51  | cDNA sequence BC029157                                                 |
| 1110027L01Ri | BC027303  | Mm.34088   | 1   | 304  | 57   | 461  | 83  | 0.01064 | 1.51  | RIKEN cDNA 1110027L01 gene                                             |
| NULL         | AK016616  | Mm.24222.2 | 1   | 279  | 69   | 423  | 66  | 0.01006 | 1.52  | null                                                                   |
| 8030445B08Ri | BI102531  | Mm.78312   | 1   | 286  | 52   | 433  | 87  | 0.01439 | 1.52  | RIKEN cDNA 8030445B08 gene                                             |

|              |           |            |     |       |      |       |      |         |      |                                                                 |
|--------------|-----------|------------|-----|-------|------|-------|------|---------|------|-----------------------------------------------------------------|
| 1300019N10Ri | AK005069  | Mm.71514   | 1   | 734   | 153  | 1114  | 99   | 0.00235 | 1.52 | RIKEN cDNA 1300019N10 gene                                      |
| NULL         | BG067018  | Mm.42588   | 1   | 171   | 36   | 261   | 33   | 0.00357 | 1.52 | Mus musculus transcribed sequences                              |
| D11ErtD707e  | NM_025918 | Mm.277638  | 1   | 161   | 19   | 245   | 52   | 0.0204  | 1.52 | DNA segment, Chr 11, ERATO Doi 707, expressed                   |
| 4933407E01Ri | BC026793  | Mm.276043  | 1   | 468   | 73   | 713   | 97   | 0.00289 | 1.52 | RIKEN cDNA 4933407E01 gene                                      |
| 2610034E13Ri | NM_029365 | Mm.157778  | 1   | 2130  | 621  | 3250  | 578  | 0.01843 | 1.53 | RIKEN cDNA 2610034E13 gene                                      |
| 2310007F12Ri | BQ177187  | Mm.8142    | 1   | 194   | 45   | 297   | 40   | 0.00494 | 1.53 | RIKEN cDNA 2310007F12 gene                                      |
| 1810037C22Ri | BE952060  | Mm.294534  | 1   | 904   | 125  | 1386  | 256  | 0.00931 | 1.53 | null                                                            |
| NULL         | AK018785  | Mm.4009.2  | 1   | 640   | 83   | 980   | 62   | 0.00017 | 1.53 | null                                                            |
| C330013D05R  | BG070774  | Mm.29914   | 1   | 1064  | 174  | 1628  | 284  | 0.00696 | 1.53 | RIKEN cDNA C330013D05 gene                                      |
| D19ErtD703e  | AK015925  | Mm.284686  | 1   | 385   | 83   | 593   | 150  | 0.03573 | 1.54 | null                                                            |
| D230016N13R  | BB107552  | Mm.111627  | 1   | 748   | 122  | 1151  | 164  | 0.00321 | 1.54 | RIKEN cDNA D230016N13 gene                                      |
| 1110020K19Ri | BM119523  | Mm.291291  | 1   | 841   | 42   | 1298  | 304  | 0.02927 | 1.54 | similar to Ras GTPase-activating protein SynGAP                 |
| C730048E16Ri | BC014743  | Mm.24262   | 1   | 546   | 105  | 843   | 95   | 0.00156 | 1.54 | RIKEN cDNA C730048E16 gene                                      |
| 2900073H19Ri | AK012124  | Mm.20273   | 1   | 941   | 239  | 1445  | 232  | 0.00963 | 1.54 | null                                                            |
| 1110003B01Ri | NM_026131 | Mm.275648  | 1   | 12163 | 768  | 18707 | 1097 | 0.00001 | 1.54 | RIKEN cDNA 1110003B01 gene                                      |
| 1810004B07Ri | BM210680  | Mm.10174   | 1   | 821   | 164  | 1273  | 166  | 0.00254 | 1.55 | RIKEN cDNA 1810004B07 gene                                      |
| BC014795     | BC019442  | Mm.185518  | 0.8 | 790   | 182  | 1223  | 286  | 0.02471 | 1.55 | cDNA sequence BC014795                                          |
| NULL         | AK013026  | Mm.22619.2 | 1   | 1406  | 248  | 2177  | 288  | 0.00192 | 1.55 | null                                                            |
| 2700087H15Ri | BC005748  | Mm.40721   | 1   | 1306  | 463  | 2033  | 307  | 0.02228 | 1.56 | RIKEN cDNA 2700087H15 gene                                      |
| 1810034B16Ri | AK007688  | Mm.41925   | 1   | 991   | 183  | 1549  | 314  | 0.01414 | 1.56 | RIKEN cDNA 1810034B16 gene                                      |
| 3010020C06   | AV026910  | Mm.249594  | 1   | 298   | 75   | 466   | 89   | 0.01254 | 1.56 | hypothetical protein 3010020C06                                 |
| BC023239     | BG076209  | Mm.295629  | 1   | 6179  | 287  | 9712  | 440  | 0       | 1.57 | cDNA sequence BC023239                                          |
| NULL         | BM239632  | Mm.259678  | 0.8 | 117   | 51   | 183   | 25   | 0.04165 | 1.57 | EST                                                             |
| 1110012E06Ri | AK003623  | Mm.205625  | 1   | 832   | 142  | 1306  | 254  | 0.01093 | 1.57 | RIKEN cDNA 1110012E06 gene                                      |
| D16ErtD502e  | BC020153  | Mm.21473   | 1   | 760   | 73   | 1192  | 117  | 0.00022 | 1.57 | DNA segment, Chr 16, ERATO Doi 502, expressed                   |
| ORF63        | AY033899  | Mm.194466  | 1   | 503   | 227  | 789   | 143  | 0.04902 | 1.57 | open reading frame 63                                           |
| 1300013J15Ri | NM_026183 | Mm.100741  | 1   | 1063  | 91   | 1674  | 378  | 0.02472 | 1.58 | RIKEN cDNA 1300013J15 gene                                      |
| BC002059     | BC002059  | Mm.255974  | 0.9 | 220   | 26   | 347   | 74   | 0.01523 | 1.58 | cDNA sequence BC002059                                          |
| B            | AK015111  | Mm.39082.2 | 1   | 406   | 38   | 648   | 107  | 0.00525 | 1.59 | null                                                            |
| D2Bwg0891e   | BC019947  | Mm.195525  | 1   | 1340  | 169  | 2136  | 183  | 0.0001  | 1.59 | DNA segment, Chr 2, Brigham & Women's Genetics 0891 expressed   |
| 2410005O16R  | BB397174  | Mm.257603  | 1   | 2938  | 369  | 4668  | 387  | 0.00009 | 1.59 | RIKEN cDNA 2410005O16 gene                                      |
| 3110038K10Ri | AK014142  | Mm.44871   | 0.9 | 461   | 123  | 734   | 168  | 0.02213 | 1.59 | null                                                            |
| LOC234776    | BQ266886  | Mm.259736  | 0.8 | 310   | 74   | 494   | 69   | 0.00379 | 1.59 | null                                                            |
| NULL         | NM_028402 | NULL       | 0.8 | 143   | 38   | 229   | 65   | 0.04521 | 1.59 | null                                                            |
| 4930542G03R  | BC005547  | Mm.227260  | 1   | 9783  | 887  | 15643 | 1590 | 0.00036 | 1.6  | RIKEN cDNA 4930542G03 gene                                      |
| 1600014E20Ri | AK005451  | Mm.22      | 1   | 137   | 25   | 218   | 53   | 0.02097 | 1.6  | RIKEN cDNA 1600014E20 gene                                      |
| NULL         | AK009453  | Mm.1417.2  | 1   | 183   | 55   | 293   | 46   | 0.00921 | 1.6  | null                                                            |
| 2400004E04Ri | AK010278  | Mm.7124    | 1   | 1544  | 145  | 2487  | 354  | 0.0027  | 1.61 | RIKEN cDNA 2400004E04 gene                                      |
| 2900042B11Ri | AK013636  | Mm.21787   | 1   | 336   | 49   | 541   | 60   | 0.00039 | 1.61 | RIKEN cDNA 2900042B11 gene                                      |
| 1500005G05R  | BC024618  | Mm.280230  | 1   | 2854  | 282  | 4604  | 676  | 0.0031  | 1.61 | RIKEN cDNA 1500005G05 gene                                      |
| 0610037P05Ri | BC011300  | Mm.42072   | 1   | 3609  | 230  | 5846  | 907  | 0.00308 | 1.62 | RIKEN cDNA 0610037P05 gene                                      |
| 2310001N14Ri | AF422244  | Mm.283493  | 1   | 6096  | 1125 | 9863  | 1884 | 0.0064  | 1.62 | RIKEN cDNA 2310001N14 gene                                      |
| 0610041D19R  | AK002882  | Mm.284594  | 1   | 1468  | 163  | 2394  | 248  | 0.00022 | 1.63 | RIKEN cDNA 0610041D19 gene                                      |
| NULL         | AV285295  | Mm.239583  | 1   | 1412  | 192  | 2300  | 208  | 0.00011 | 1.63 | null                                                            |
| D7Wsu87e     | AJ250693  | Mm.246240  | 1   | 1903  | 544  | 3116  | 317  | 0.00507 | 1.64 | TRAF-binding protein                                            |
| NULL         | AV034993  | NULL       | 1   | 456   | 74   | 747   | 193  | 0.02566 | 1.64 | null                                                            |
| D7ErtD458e   | BB049138  | Mm.227506  | 0.5 | 364   | 131  | 601   | 107  | 0.01441 | 1.65 | null                                                            |
| D8ErtD812e   | BG069220  | Mm.275720  | 1   | 755   | 245  | 1248  | 56   | 0.01192 | 1.65 | null                                                            |
| 1300010A20Ri | BI440178  | Mm.225289  | 0.8 | 121   | 15   | 202   | 29   | 0.00155 | 1.66 | RIKEN cDNA 1300010A20 gene                                      |
| NULL         | AB056443  | NULL       | 1   | 183   | 68   | 305   | 83   | 0.03454 | 1.67 | null                                                            |
| 4930544L10Ri | BG067288  | Mm.235366  | 1   | 552   | 176  | 923   | 233  | 0.02528 | 1.67 | RIKEN cDNA 4930544L10 gene                                      |
| NULL         | AK005822  | Mm.322736  | 0.6 | 274   | 80   | 459   | 130  | 0.03097 | 1.67 | null                                                            |
| BC037674     | BB479063  | Mm.301179  | 1   | 9300  | 832  | 15522 | 4696 | 0.04339 | 1.67 | Mus musculus similar to RIKEN cDNA 4930449I24 (LOC385302), mRNA |
| 2310004N11Ri | AV091811  | Mm.260802  | 1   | 1823  | 158  | 3071  | 283  | 0.00014 | 1.68 | null                                                            |
| 1700037B15Ri | AV251625  | Mm.250841  | 1   | 4716  | 1023 | 7915  | 679  | 0.00065 | 1.68 | RIKEN cDNA 1700037B15 gene                                      |
| 2410018C20Ri | NM_026423 | Mm.278085  | 1   | 740   | 87   | 1243  | 121  | 0.00014 | 1.68 | RIKEN cDNA 2410018C20 gene                                      |
| D830019K17R  | BC016136  | Mm.257236  | 1   | 1301  | 486  | 2200  | 460  | 0.01704 | 1.69 | RIKEN cDNA D830019K17 gene                                      |
| A1839562     | NM_019914 | Mm.331208  | 1   | 1983  | 304  | 3361  | 478  | 0.00097 | 1.69 | RIKEN cDNA 5730493B19 [Mus musculus]                            |
| NULL         | AK013560  | Mm.100510. | 0.8 | 79    | 33   | 134   | 13   | 0.02003 | 1.69 | null                                                            |
| 2210021J22Ri | BC025858  | Mm.33706   | 1   | 1174  | 357  | 1997  | 353  | 0.00638 | 1.7  | RIKEN cDNA 2210021J22 gene                                      |

|              |           |            |     |       |      |       |      |         |      |                                         |
|--------------|-----------|------------|-----|-------|------|-------|------|---------|------|-----------------------------------------|
| NULL         | AK018829  | Mm.41682.2 | 0.6 | 302   | 107  | 513   | 93   | 0.01065 | 1.7  | null                                    |
| BC025872     | BC025872  | Mm.265552  | 1   | 4045  | 293  | 6919  | 685  | 0.00035 | 1.71 | null                                    |
| NULL         | BB794641  | Mm.320036  | 1   | 917   | 152  | 1571  | 535  | 0.04666 | 1.71 | Mus musculus transcribed sequences      |
| 2210418O10R  | CA566463  | Mm.229100  | 0.6 | 63    | 11   | 109   | 27   | 0.01902 | 1.72 | hypothetical protein C230069C04         |
| 1190005L06Ri | BB030180  | Mm.259223  | 1   | 309   | 90   | 534   | 36   | 0.00361 | 1.73 | RIKEN cDNA 1190005L06 gene              |
| 2700071E21Ri | BM946248  | Mm.33121   | 1   | 1960  | 733  | 3388  | 1101 | 0.04657 | 1.73 | RIKEN cDNA 2700071E21 gene              |
| 2310008N12Ri | BI649826  | Mm.30060   | 0.7 | 523   | 48   | 907   | 111  | 0.0009  | 1.73 | RIKEN cDNA 2310008N12 gene              |
| BC003331     | BC003331  | Mm.222093  | 1   | 983   | 236  | 1725  | 188  | 0.00058 | 1.75 | cDNA sequence BC003331                  |
| 4930544L10Ri | BI871826  | Mm.101141  | 1   | 617   | 154  | 1086  | 159  | 0.0015  | 1.76 | RIKEN cDNA 4930544L10 gene              |
| 1810073P09Ri | AK007980  | Mm.202157  | 1   | 1807  | 114  | 3227  | 183  | 0       | 1.79 | RIKEN cDNA 1810073P09 gene              |
| NULL         | AI627121  | Mm.340526  | 0.5 | 87    | 8    | 159   | 36   | 0.0123  | 1.83 | ESTs                                    |
| 3110038L01Ri | NM_026524 | Mm.29429   | 1   | 2581  | 574  | 4762  | 548  | 0.00028 | 1.84 | RIKEN cDNA 3110038L01 gene              |
| 5830411E10Ri | AK015312  | Mm.196290  | 1   | 204   | 67   | 376   | 102  | 0.01639 | 1.84 | null                                    |
| 2210021G21R  | BC010346  | Mm.32883   | 0.5 | 528   | 136  | 990   | 174  | 0.00162 | 1.88 | RIKEN cDNA 2210021G21 gene              |
| 2610005B21Ri | AK011311  | Mm.291583  | 0.7 | 148   | 40   | 278   | 78   | 0.01625 | 1.88 | RIKEN cDNA 2610005B21 gene              |
| 1110028E10Ri | BB145101  | Mm.148425  | 1   | 4049  | 750  | 7626  | 249  | 0.00016 | 1.88 | RIKEN cDNA 1110028E10 gene              |
| NULL         | BC021349  | Mm.176845  | 0.9 | 433   | 105  | 817   | 162  | 0.00307 | 1.89 | null                                    |
| 2310047C17Ri | BC028439  | Mm.35669   | 1   | 370   | 59   | 698   | 90   | 0.00025 | 1.89 | RIKEN cDNA 2310047C17 gene              |
| BC024683     | BI106637  | Mm.233067  | 1   | 854   | 94   | 1618  | 180  | 0.00016 | 1.89 | null                                    |
| NULL         | AK006149  | NULL       | 1   | 944   | 59   | 1821  | 387  | 0.00749 | 1.93 | null                                    |
| 1110035L05Ri | AV048291  | Mm.29140   | 1   | 358   | 235  | 696   | 131  | 0.03117 | 1.94 | RIKEN cDNA 1110035L05 gene              |
| 2310047C17Ri | AK009866  | Mm.35669   | 1   | 583   | 182  | 1129  | 169  | 0.00119 | 1.94 | null                                    |
| 2700082D03R  | AI195545  | Mm.259121  | 1   | 1691  | 293  | 3308  | 444  | 0.00026 | 1.96 | RIKEN cDNA 2700082D03 gene              |
| A930031D07R  | AI426503  | Mm.208445  | 0.8 | 224   | 40   | 439   | 165  | 0.04791 | 1.96 | RIKEN cDNA A930031D07 gene              |
| LOC228785    | BC019408  | Mm.250604  | 1   | 11875 | 3621 | 23218 | 5797 | 0.00755 | 1.96 | hypothetical protein LOC228785          |
| 1110038D17R  | AK004153  | Mm.29382   | 1   | 4432  | 1061 | 8807  | 404  | 0.00035 | 1.99 | RIKEN cDNA 1110038D17 gene              |
| C030022K24R  | BC019151  | Mm.159924  | 0.8 | 193   | 34   | 393   | 87   | 0.00498 | 2.03 | RIKEN cDNA C030022K24 gene              |
| NULL         | BB533448  | Mm.34042   | 1   | 2809  | 854  | 5832  | 866  | 0.00054 | 2.08 | null                                    |
| NULL         | NM_133914 | NULL       | 0.8 | 416   | 168  | 871   | 201  | 0.00472 | 2.09 | null                                    |
| NULL         | W45978    | Mm.178550  | 1   | 2062  | 396  | 4570  | 1432 | 0.01295 | 2.22 | Mus musculus, clone IMAGE:4206343, mRNA |
| 2700055K07Ri | NM_026481 | Mm.29358   | 1   | 1695  | 326  | 3880  | 400  | 0.00001 | 2.29 | RIKEN cDNA 2700055K07 gene              |
| 1110028E10Ri | BB478892  | Mm.148425  | 1   | 475   | 293  | 1137  | 440  | 0.02655 | 2.39 | RIKEN cDNA 1110028E10 gene              |
| 1110028G01R  | AJ277212  | Mm.220895  | 1   | 2812  | 325  | 6898  | 1704 | 0.00623 | 2.45 | RIKEN cDNA 1110028G01 gene              |
| B130052G07R  | BC024141  | Mm.22856   | 1   | 130   | 67   | 337   | 79   | 0.00217 | 2.6  | RIKEN cDNA B130052G07 gene              |
| 1110030K22Ri | NM_024230 | Mm.33452   | 1   | 1337  | 149  | 3495  | 1348 | 0.02363 | 2.61 | RIKEN cDNA 1110030K22 gene              |
| 3010020C06   | NM_021883 | Mm.249594  | 1   | 3354  | 782  | 9051  | 2066 | 0.00221 | 2.7  | hypothetical protein 3010020C06         |
| 4930586I02Ri | NM_026580 | Mm.127378  | 1   | 375   | 73   | 1031  | 144  | 0.0001  | 2.75 | RIKEN cDNA 4930586I02 gene              |
| 4930586I02Ri | AK006346  | Mm.127378  | 1   | 280   | 132  | 779   | 165  | 0.00076 | 2.78 | RIKEN cDNA 4930586I02 gene              |

SUPPLEMENTAL TABLE 2

Changes in gene expression in the medial gastrocnemius of MGSKO mice as compared with wild-type littermates. See legend to Supplemental Table 1. Exp, MGSKO samples.

**CARBOHYDRATE METABOLISM**

| GeneSymbol | Genbank   | Unigene   | A/P | Ctl Mean | Ctl stdev | Exp Mean | Exp stdev | P-value | Fold Change | Gene Description                                                    |
|------------|-----------|-----------|-----|----------|-----------|----------|-----------|---------|-------------|---------------------------------------------------------------------|
| Gys1/Gys3  | NM_008195 | Mm.275654 | 1   | 5033     | 947       | 96       | 59        | 0.00031 | -52.03      | glycogen synthase 1                                                 |
| Gys1/Gys3  | NM_030678 | Mm.275654 | 1   | 2507     | 464       | 64       | 83        | 0.00033 | -38.86      | glycogen synthase 1                                                 |
| Ppp1r1a    | NM_021391 | Mm.143788 | 1   | 1561     | 419       | 441      | 64        | 0.00424 | -3.54       | protein phosphatase 1, regulatory (inhibitor) subunit 1A            |
| Gyk        | NM_008194 | Mm.246682 | 1   | 358      | 204       | 113      | 46        | 0.04978 | -3.16       | glycerol kinase                                                     |
| Pfkfb3     | AV282911  | Mm.19669  | 1   | 2514     | 942       | 951      | 581       | 0.02728 | -2.64       | 6-phosphofructo-2-kinase/fructose-2,6-biphosphatase 3               |
| Uap1       | AI467637  | Mm.27969  | 0.5 | 132      | 48        | 58       | 24        | 0.02913 | -2.26       | UDP-N-acetylglucosamine pyrophosphorylase 1                         |
| Aldo3      | BC008184  | Mm.7729   | 0.9 | 254      | 77        | 112      | 49        | 0.01987 | -2.26       | aldolase 3, C isoform                                               |
| Slc2a3     | BB414515  | Mm.269857 | 1   | 1346     | 225       | 658      | 78        | 0.00158 | -2.04       | solute carrier family 2 (facilitated glucose transporter), member 3 |
| Lgals4     | BC021632  | Mm.210336 | 1   | 729      | 152       | 385      | 80        | 0.00582 | -1.89       | lectin, galactose binding, soluble 4                                |
| Slc2a3     | BB414515  | Mm.269857 | 1   | 884      | 112       | 481      | 92        | 0.0027  | -1.84       | solute carrier family 2 (facilitated glucose transporter), member 3 |
| Bdh        | BF322712  | Mm.293470 | 1   | 4060     | 548       | 2285     | 564       | 0.01214 | -1.78       | 3-hydroxybutyrate dehydrogenase (heart, mitochondrial)              |
| Lman1      | AI787074  | Mm.290857 | 1   | 950      | 299       | 543      | 159       | 0.0465  | -1.75       | lectin, mannose-binding, 1                                          |
| Glo1       | AK005055  | Mm.261984 | 1   | 7725     | 1825      | 4628     | 535       | 0.01643 | -1.67       | glyoxalase 1                                                        |
| Glo1       | BC024663  | Mm.261984 | 1   | 3796     | 1013      | 2317     | 273       | 0.02739 | -1.64       | glyoxalase 1                                                        |
| Glo1       | BC024663  | Mm.261984 | 1   | 1627     | 329       | 1006     | 132       | 0.00961 | -1.62       | glyoxalase 1                                                        |
| Por        | NM_008898 | Mm.3863   | 1   | 2622     | 731       | 1641     | 201       | 0.03682 | -1.6        | P450 (cytochrome) oxidoreductase                                    |
| Pfkfb3     | NM_133232 | Mm.19669  | 1   | 7667     | 2169      | 4825     | 249       | 0.04421 | -1.59       | 6-phosphofructo-2-kinase/fructose-2,6-biphosphatase 3               |
| Lman1      | AK011495  | Mm.290857 | 1   | 1084     | 150       | 688      | 175       | 0.03123 | -1.57       | lectin, mannose-binding, 1                                          |
| Glul       | AI391218  | Mm.210745 | 1   | 8415     | 1091      | 5601     | 1273      | 0.03323 | -1.5        | glutamate-ammonia ligase (glutamine synthase)                       |
| Ugp2       | AV370025  | Mm.130747 | 1   | 7005     | 1442      | 11098    | 613       | 0.00143 | 1.58        | UDP-glucose pyrophosphorylase 2                                     |
| Ugp2       | AV370025  | Mm.130747 | 1   | 6808     | 1737      | 10947    | 1320      | 0.01262 | 1.61        | UDP-glucose pyrophosphorylase 2                                     |
| Gck        | L38990    | Mm.220358 | 1   | 536      | 199       | 902      | 146       | 0.02485 | 1.68        | glucokinase                                                         |
| Neu2       | AK009828  | Mm.45670  | 0.8 | 421      | 77        | 739      | 118       | 0.02562 | 1.75        | neuraminidase 2                                                     |
| Mgat4b     | BC026638  | Mm.86759  | 1   | 1418     | 461       | 2554     | 237       | 0.00375 | 1.8         | mannoside acetylglucosaminyltransferase 4, isoenzyme B              |
| Gbe1       | NM_028803 | Mm.29201  | 1   | 672      | 132       | 1272     | 106       | 0.00091 | 1.89        | glucan (1,4-alpha-), branching enzyme 1                             |
| Nudt14     | BC025444  | Mm.7070   | 0.8 | 193      | 105       | 427      | 66        | 0.00839 | 2.21        | nudix (nucleoside diphosphate linked moiety X)-type motif 14        |

**AMINO ACID METABOLISM**

| GeneSymbol | Genbank   | Unigene   | A/P | Ctl Mean | Ctl stdev | Exp Mean | Exp stdev | P-value | Fold Change | Gene Description                                           |
|------------|-----------|-----------|-----|----------|-----------|----------|-----------|---------|-------------|------------------------------------------------------------|
| Odc        | C81193    | Mm.319739 | 1   | 12346    | 1116      | 2965     | 465       | 0       | -4.16       | ornithine decarboxylase                                    |
| Amd1       | BM114293  | Mm.253533 | 1   | 19279    | 2775      | 5890     | 1609      | 0.00013 | -3.27       | S-adenosylmethionine decarboxylase 1                       |
| Odc        | BB519474  | Mm.311147 | 1   | 5068     | 592       | 1601     | 184       | 0       | -3.16       | ornithine decarboxylase                                    |
| Odc        | S64539    | Mm.34102  | 1   | 2268     | 148       | 799      | 72        | 0       | -2.84       | ornithine decarboxylase                                    |
| Amd1       | NM_009665 | Mm.253533 | 1   | 14888    | 1915      | 7630     | 919       | 0.00036 | -1.95       | S-adenosylmethionine decarboxylase 1                       |
| Oplah      | BC025120  | Mm.322738 | 1   | 1817     | 426       | 1001     | 148       | 0.01135 | -1.82       | Oplah: 5-oxoprolinase                                      |
| Gstz1      | AB041613  | Mm.29652  | 1   | 2225     | 709       | 1262     | 369       | 0.04542 | -1.76       | glutathione transferase zeta 1                             |
| Sps2       | NM_009266 | Mm.20294  | 1   | 2249     | 579       | 1296     | 277       | 0.02043 | -1.73       | selenophosphate synthetase 2                               |
| Mtap       | AB056100  | Mm.28500  | 1   | 477      | 79        | 276      | 67        | 0.01241 | -1.73       | methylthioadenosine phosphorylase                          |
| Oat        | BC008119  | Mm.13694  | 1   | 10732    | 2642      | 6899     | 1042      | 0.0277  | -1.56       | ornithine aminotransferase                                 |
| Bckdhhb    | AW047304  | Mm.12819  | 1   | 1592     | 219       | 1021     | 242       | 0.02888 | -1.56       | branched chain ketoacid dehydrogenase E1, beta polypeptide |
| Dbt        | NM_010022 | Mm.3636   | 1   | 905      | 143       | 594      | 79        | 0.00755 | -1.52       | dihydroliipoamide branched chain transacylase E2           |
| Aacs       | AI987654  | Mm.296918 | 1   | 242      | 87        | 623      | 177       | 0.04052 | 2.57        | acetoacetyl-CoA synthetase                                 |
| Aacs       | BC026817  | Mm.296918 | 1   | 348      | 70        | 920      | 193       | 0.03878 | 2.64        | acetoacetyl-CoA synthetase                                 |

**LIPID METABOLISM**

| GeneSymbol | Genbank   | Unigene   | A/P | Ctl Mean | Ctl stdev | Exp Mean | Exp stdev | P-value | Fold Change | Gene Description                                               |
|------------|-----------|-----------|-----|----------|-----------|----------|-----------|---------|-------------|----------------------------------------------------------------|
| Cpt1a      | CA564810  | Mm.18522  | 1   | 105      | 37        | 49       | 21        | 0.03481 | -2.15       | carnitine palmitoyltransferase 1a, liver                       |
| Sc5d       | AB016248  | Mm.32700  | 1   | 1438     | 397       | 686      | 137       | 0.01191 | -2.1        | sterol-C5-desaturase (fungal ERG3, delta-5-desaturase) homolog |
| Pank1      | NM_023792 | Mm.24742  | 1   | 2325     | 498       | 1148     | 448       | 0.01835 | -2.02       | pantothenate kinase 1                                          |
| Pank1      | AK017345  | Mm.24742  | 1   | 1268     | 227       | 634      | 33        | 0.00358 | -2          | pantothenate kinase 1                                          |
| Acadsb     | BF228057  | Mm.270388 | 1   | 2059     | 142       | 1168     | 222       | 0.00841 | -1.76       | acyl-Coenzyme A dehydrogenase, short/branched chain            |
| Oxct       | NM_024188 | Mm.13445  | 1   | 7590     | 2155      | 4416     | 207       | 0.03087 | -1.72       | 3-oxoacid CoA transferase                                      |
| Adhfe1     | BC026584  | Mm.28514  | 1   | 1697     | 286       | 996      | 252       | 0.01524 | -1.7        | alcohol dehydrogenase, iron containing, 1                      |
| Facl2      | NM_007981 | Mm.210323 | 1   | 8434     | 1745      | 5076     | 1259      | 0.01987 | -1.66       | fatty acid Coenzyme A ligase                                   |
| Acads      | NM_007383 | Mm.18759  | 1   | 3318     | 687       | 2041     | 198       | 0.01148 | -1.63       | acyl-Coenzyme A dehydrogenase, short chain                     |
| Ggps1      | C79210    | Mm.148039 | 1   | 384      | 59        | 240      | 47        | 0.01311 | -1.6        | geranylgeranyl diphosphate synthase 1                          |
| Nudt7      | AK011172  | Mm.27889  | 1   | 2114     | 425       | 1391     | 294       | 0.02983 | -1.52       | nudix (nucleoside diphosphate linked moiety X)-type motif 7    |
| Ppap2a     | NM_008903 | Mm.317186 | 1   | 2234     | 591       | 3558     | 683       | 0.0495  | 1.59        | phosphatidic acid phosphatase 2a                               |
| Facl6      | BC022959  | Mm.267478 | 1   | 1608     | 378       | 2788     | 60        | 0.00241 | 1.73        | fatty acid Coenzyme A ligase, long chain 6                     |

### MISCELLANEOUS METABOLISM

| GeneSymbol | Genbank   | Unigene   | A/P | Ctl Mean | Ctl stdev | Exp Mean | Exp stdev | P-value | Fold Change | Gene Description                                                  |
|------------|-----------|-----------|-----|----------|-----------|----------|-----------|---------|-------------|-------------------------------------------------------------------|
| Dcxr       | BC012247  | Mm.231091 | 1   | 1609     | 761       | 573      | 237       | 0.03696 | -2.81       | dicarbonyl L-xylulose reductase                                   |
| Hsd17b7    | NM_010476 | Mm.12882  | 0.6 | 338      | 58        | 144      | 79        | 0.03527 | -2.35       | hydroxysteroid (17-beta) dehydrogenase 7                          |
| Dgat2      | NM_026384 | Mm.180189 | 1   | 3347     | 1228      | 1637     | 188       | 0.03793 | -2.04       | diacylglycerol O-acyltransferase 2                                |
| Gch        | BB698398  | Mm.10651  | 1   | 367      | 141       | 184      | 63        | 0.04664 | -1.99       | GTP cyclohydrolase 1                                              |
| Entpd5     | NM_007647 | Mm.10211  | 1   | 1106     | 328       | 611      | 189       | 0.03522 | -1.81       | ectonucleoside triphosphate diphosphohydrolase 5                  |
| Dhrs4      | NM_030686 | Mm.27427  | 1   | 1884     | 556       | 1116     | 220       | 0.03361 | -1.69       | dehydrogenase/reductase (SDR family) member 4                     |
| Cyp51      | BB004104  | Mm.140158 | 0.9 | 114      | 35        | 69       | 9         | 0.04557 | -1.63       | cytochrome P450, 51                                               |
| Hyal1      | NM_008317 | Mm.10305  | 0.7 | 291      | 38        | 183      | 49        | 0.04886 | -1.59       | hyaluronidase 1                                                   |
| Cat        | NM_009804 | Mm.4215   | 1   | 8762     | 2204      | 5537     | 1366      | 0.04329 | -1.58       | catalase, response to oxidative stress                            |
| Pnp        | AK008143  | Mm.17932  | 1   | 953      | 252       | 616      | 51        | 0.03434 | -1.55       | purine-nucleoside phosphorylase                                   |
| Alad       | BC018236  | Mm.6988   | 1   | 1262     | 238       | 834      | 170       | 0.02561 | -1.51       | aminolevulinic acid, delta-, dehydratase                          |
| Dutp       | AF091101  | Mm.282499 | 1   | 194      | 38        | 293      | 16        | 0.00235 | 1.51        | deoxyuridine triphosphatase                                       |
| Drpla      | NM_007881 | Mm.3172   | 1   | 338      | 97        | 544      | 84        | 0.02558 | 1.61        | dentatorubral pallidoluysian atrophy                              |
| Adprt13    | BC014870  | Mm.273659 | 1   | 795      | 135       | 1402     | 78        | 0.0002  | 1.76        | ADP-ribosyltransferase (NAD+; poly (ADP-ribose polymerase)-like 3 |
| Adprt3     | BC014870  | Mm.273659 | 1   | 2589     | 1115      | 4803     | 262       | 0.00813 | 1.86        | ADP-ribosyltransferase (NAD+; poly (ADP-ribose polymerase)-like 3 |
| Car14      | NM_011797 | Mm.224836 | 1   | 1674     | 80        | 3150     | 185       | 0.00582 | 1.88        | carbonic anhydrase 14                                             |

### MUSCLE

| GeneSymbol | Genbank   | Unigene   | A/P | Ctl Mean | Ctl stdev | Exp Mean | Exp stdev | P-value | Fold Change | Gene Description                                                                |
|------------|-----------|-----------|-----|----------|-----------|----------|-----------|---------|-------------|---------------------------------------------------------------------------------|
| Rsn        | NM_019765 | Mm.241109 | 1   | 5662     | 1084      | 3286     | 270       | 0.00551 | -1.72       | restin (Reed-Steinberg cell-expressed intermediate filament-associated protein) |
| Utrn       | AI788797  | Mm.331784 | 1   | 1068     | 140       | 1667     | 207       | 0.02151 | 1.56        | utrophin                                                                        |
| Myom2      | BB474208  | Mm.272115 | 1   | 14769    | 1252      | 23360    | 3120      | 0.04499 | 1.58        | myomesin 2                                                                      |
| Atp2a2     | NM_009722 | Mm.227583 | 1   | 8051     | 2025      | 13383    | 1666      | 0.00996 | 1.66        | ATPase, Ca++ transporting, cardiac muscle, slow twitch 2                        |
| Myl2       | NM_010861 | Mm.1529   | 1   | 13584    | 2825      | 23750    | 3344      | 0.01164 | 1.75        | myosin, light polypeptide 2, regulatory, cardiac, slow                          |
| Myoz2      | NM_021503 | Mm.141157 | 1   | 5765     | 663       | 10290    | 1372      | 0.01278 | 1.78        | myozenin 2                                                                      |
| Tpm3       | NM_022314 | Mm.240839 | 1   | 3159     | 1071      | 5616     | 1257      | 0.04759 | 1.78        | tropomyosin 3                                                                   |
| Mybph      | NM_016749 | Mm.269621 | 1   | 2337     | 1078      | 4262     | 872       | 0.03982 | 1.82        | myosin binding protein H                                                        |
| Tpm3       | NM_022314 | Mm.240839 | 1   | 2694     | 845       | 5120     | 815       | 0.01588 | 1.9         | tropomyosin 3                                                                   |
| Myh11      | BC026142  | Mm.250705 | 1   | 661      | 52        | 1312     | 224       | 0.03849 | 1.98        | myosin, heavy polypeptide 11, smooth muscle                                     |
| Myh6       | NM_080728 | Mm.290003 | 1   | 3087     | 1273      | 6140     | 1076      | 0.01521 | 1.99        | myosin, heavy polypeptide 6, cardiac muscle, alpha                              |
| Myl3       | AK002312  | Mm.7353   | 1   | 9571     | 1431      | 19173    | 2567      | 0.00951 | 2           | myosin, light polypeptide 3, alkali; ventricular, skeletal, slow                |
| Tncc       | NM_009393 | Mm.712    | 1   | 4435     | 1382      | 9019     | 1716      | 0.01719 | 2.03        | troponin C, cardiac/slow skeletal                                               |
| Tnnt1      | NM_011618 | Mm.711    | 1   | 3091     | 1119      | 6599     | 1397      | 0.02092 | 2.13        | troponin T1, skeletal, slow                                                     |
| Myl3       | X67685    | Mm.7353   | 1   | 3128     | 607       | 6722     | 1180      | 0.01628 | 2.15        | myosin, light polypeptide 3, alkali; ventricular, skeletal, slow                |
| Myl3       | X67685    | Mm.7353   | 1   | 10033    | 1227      | 21665    | 3030      | 0.02397 | 2.16        | myosin, light polypeptide 3, alkali; ventricular, skeletal, slow                |
| Actc1      | NM_009608 | Mm.686    | 1   | 4975     | 1667      | 12207    | 2226      | 0.01658 | 2.45        | actin, alpha, cardiac                                                           |
| Myh6       | NM_080728 | Mm.290003 | 1   | 1299     | 458       | 3392     | 723       | 0.02053 | 2.61        | myosin, heavy polypeptide 6, cardiac muscle, alpha                              |

### WNT PATHWAY

| GeneSymbol | Genbank   | Unigene   | A/P | Ctl Mean | Ctl stdev | Exp Mean | Exp stdev | P-value | Fold Change | Gene Description                                                            |
|------------|-----------|-----------|-----|----------|-----------|----------|-----------|---------|-------------|-----------------------------------------------------------------------------|
| Dkk3       | NM_015814 | Mm.55143  | 0.8 | 1001     | 199       | 208      | 20        | 0.00092 | -4.82       | dickkopf homolog 3                                                          |
| Dkk3       | AK004853  | Mm.55143  | 1   | 1062     | 298       | 297      | 25        | 0.00467 | -3.57       | dickkopf homolog 3 (Xenopus laevis)                                         |
| Wnt4       | NM_009523 | Mm.20355  | 0.8 | 938      | 123       | 508      | 78        | 0.00095 | -1.84       | wingless-related MMTV integration site 4                                    |
| Herpud1    | AI835088  | Mm.29151  | 1   | 8083     | 1631      | 5327     | 440       | 0.01609 | -1.52       | homocysteine-inducible, ER stress-inducible, ubiquitin-like domain member 1 |
| Herpud1    | NM_022331 | Mm.29151  | 1   | 6599     | 1213      | 4359     | 620       | 0.01373 | -1.51       | homocysteine-inducible, ER stress-inducible, ubiquitin-like domain member 1 |
| Catnbip1   | NM_023465 | Mm.263330 | 1   | 549      | 168       | 913      | 145       | 0.02316 | 1.66        | catenin beta interacting protein 1                                          |
| Cdh5       | AW543698  | Mm.21767  | 1   | 1376     | 368       | 3163     | 703       | 0.02663 | 2.3         | cadherin 5                                                                  |
| Dkk2       | NM_020265 | Mm.103593 | 1   | 348      | 104       | 803      | 33        | 0.00029 | 2.31        | dickkopf homolog 2 (Xenopus laevis)                                         |

### TRANSCRIPTION FACTORS/REGULATION OF TRANSCRIPTION

| GeneSymbol | Genbank   | Unigene   | A/P | Ctl Mean | Ctl stdev | Exp Mean | Exp stdev | P-value | Fold Change | Gene Description                           |
|------------|-----------|-----------|-----|----------|-----------|----------|-----------|---------|-------------|--------------------------------------------|
| Musk       | U37709    | Mm.16148  | 0.8 | 872      | 279       | 375      | 107       | 0.01183 | -2.33       | muscle, skeletal, receptor tyrosine kinase |
| Creg       | NM_011804 | Mm.459    | 1   | 5136     | 1840      | 2295     | 236       | 0.02714 | -2.24       | cellular repressor of E1A-stimulated genes |
| Creg       | BC027426  | Mm.294885 | 1   | 5011     | 1589      | 2500     | 443       | 0.02093 | -2          | cellular repressor of E1A-stimulated genes |
| Mdm4       | BC003750  | Mm.326936 | 1   | 211      | 58        | 120      | 28        | 0.02511 | -1.75       | mouse double minute 4                      |
| Hmgb2      | C85885    | Mm.279998 | 1   | 191      | 49        | 114      | 27        | 0.03087 | -1.66       | high mobility group box 2                  |
| Klf9       | AV354744  | Mm.19788  | 1   | 9905     | 1835      | 5981     | 1543      | 0.02298 | -1.66       | Kruppel-like factor 9                      |
| Myog       | NM_031189 | Mm.16528  | 0.8 | 485      | 68        | 303      | 48        | 0.0048  | -1.6        | myogenin                                   |
| Sox17      | AK004781  | Mm.279103 | 1   | 832      | 244       | 1263     | 140       | 0.01954 | 1.52        | SRY-box containing gene 17                 |



|         |           |           |     |      |     |      |     |         |      |                                                                           |
|---------|-----------|-----------|-----|------|-----|------|-----|---------|------|---------------------------------------------------------------------------|
| Lass4   | BB006809  | Mm.35511  | 1   | 60   | 22  | 93   | 14  | 0.04608 | 1.54 | longevity assurance homolog 4 (S. cerevisiae)                             |
| Mkrn1   | AA717142  | Mm.270484 | 1   | 625  | 102 | 968  | 91  | 0.00443 | 1.55 | makorin, ring finger protein, 1                                           |
| Notch4  | NM_010929 | Mm.173813 | 1   | 473  | 123 | 738  | 76  | 0.00942 | 1.56 | Notch gene homolog 4 (Drosophila)                                         |
| Zfp100  | NM_009541 | Mm.4340   | 1   | 482  | 82  | 756  | 31  | 0.00055 | 1.57 | zinc finger protein 100                                                   |
| Nrarp   | NM_025980 | Mm.46539  | 1   | 671  | 251 | 1061 | 170 | 0.04022 | 1.58 | Notch-regulated ankyrin repeat protein                                    |
| Per1    | AF022992  | Mm.7373   | 1   | 1575 | 611 | 2551 | 446 | 0.04094 | 1.62 | period homolog 1 (Drosophila)                                             |
| Ets1    | BB151715  | Mm.292415 | 1   | 937  | 375 | 1540 | 48  | 0.02397 | 1.64 | E26 avian leukemia oncogene 1, 5' domain                                  |
| Fhl2    | NM_010212 | Mm.6799   | 0.7 | 297  | 65  | 496  | 43  | 0.0021  | 1.67 | four and a half LIM domains 2                                             |
| Dbp     | BY061007  | Mm.3459   | 0.7 | 238  | 127 | 402  | 50  | 0.04351 | 1.69 | D site albumin promoter binding protein                                   |
| Zfp292  | BI686420  | Mm.38193  | 1   | 370  | 111 | 641  | 81  | 0.00761 | 1.73 | zinc finger protein 292, Zn-15, Zn-16                                     |
| Ets1    | BB151715  | Mm.292415 | 1   | 486  | 114 | 842  | 89  | 0.00445 | 1.73 | E26 avian leukemia oncogene 1, 5' domain                                  |
| Hlx     | NM_008250 | Mm.1347   | 0.7 | 410  | 137 | 713  | 40  | 0.00577 | 1.74 | H2.0-like homeo box gene                                                  |
| Foxo1   | AJ252157  | Mm.29891  | 1   | 1561 | 490 | 2899 | 325 | 0.00358 | 1.86 | forkhead box O1                                                           |
| Klf5    | BG069607  | Mm.308750 | 1   | 428  | 148 | 797  | 60  | 0.00265 | 1.86 | Kruppel-like factor 5 (intestinal)                                        |
| Relb    | NM_009046 | Mm.1741   | 0.7 | 231  | 56  | 473  | 84  | 0.02138 | 2.05 | avian reticuloendotheliosis viral (v-rel) oncogene related B              |
| Smarca1 | NM_053123 | Mm.229151 | 1   | 138  | 48  | 368  | 51  | 0.00328 | 2.67 | SWI/SNF rel, matrix assoc, actin dep reg of chromatin, subfamily a, mem 1 |

#### EXTRACELLULAR/MATRIX/CYTOPLASMIC

| GeneSymbol | Genbank   | Unigene   | A/P | Ctl Mean | Ctl stdev | Exp Mean | Exp stdev | P-value | Fold Change | Gene Description                                              |
|------------|-----------|-----------|-----|----------|-----------|----------|-----------|---------|-------------|---------------------------------------------------------------|
| Fgfbp1     | U49641    | Mm.46053  | 1   | 709      | 213       | 152      | 22        | 0.00443 | -4.66       | fibroblast growth factor binding protein 1                    |
| Umod       | BB747266  | Mm.10826  | 0.6 | 255      | 155       | 56       | 17        | 0.04742 | -4.49       | uromodulin                                                    |
| Inhbe      | BC010404  | Mm.3510   | 1   | 409      | 157       | 207      | 35        | 0.03997 | -1.98       | inhibin beta E                                                |
| Btc        | NM_007568 | Mm.2024   | 0.6 | 67       | 6         | 40       | 8         | 0.02067 | -1.66       | betacellulin, epidermal growth factor family member           |
| Bmp1       | L24755    | Mm.27757  | 0.8 | 943      | 248       | 574      | 91        | 0.03031 | -1.64       | bone morphogenetic protein 1                                  |
| Igf1       | BC012409  | Mm.268521 | 1   | 899      | 213       | 556      | 116       | 0.02584 | -1.62       | insulin-like growth factor 1                                  |
| Bmp6       | NM_007556 | Mm.254978 | 1   | 1097     | 188       | 1782     | 271       | 0.03097 | 1.62        | bone morphogenetic protein 6                                  |
| Cxcl14     | AF144754  | Mm.30211  | 1   | 1923     | 399       | 3142     | 278       | 0.00228 | 1.63        | chemokine (C-X-C motif) ligand 14                             |
| Kitl       | NM_013598 | Mm.45124  | 1   | 1561     | 480       | 2769     | 416       | 0.01339 | 1.77        | kit ligand                                                    |
| Ptx3       | NM_008987 | Mm.276776 | 1   | 227      | 105       | 421      | 51        | 0.0131  | 1.85        | pentaxin related gene                                         |
| Spock2     | BM117672  | Mm.153429 | 1   | 771      | 139       | 1711     | 359       | 0.04935 | 2.22        | sparc/osteonectin, cwcv and kazal-like domains proteoglycan 2 |

#### RECEPTORS

| GeneSymbol | Genbank   | Unigene   | A/P | Ctl Mean | Ctl stdev | Exp Mean | Exp stdev | P-value | Fold Change | Gene Description                                                                |
|------------|-----------|-----------|-----|----------|-----------|----------|-----------|---------|-------------|---------------------------------------------------------------------------------|
| Oprs1      | AF226605  | Mm.22745  | 1   | 943      | 333       | 409      | 161       | 0.02287 | -2.3        | opioid receptor, sigma 1                                                        |
| Tnfrsf19   | AF167554  | Mm.281356 | 0.8 | 364      | 87        | 172      | 88        | 0.04086 | -2.11       | tumor necrosis factor receptor superfamily, member 19                           |
| Trfr       | NM_011638 | Mm.28683  | 0.8 | 454      | 119       | 230      | 106       | 0.03977 | -1.98       | transferrin receptor                                                            |
| Tnfrsf19   | NM_013869 | Mm.281356 | 1   | 791      | 239       | 415      | 155       | 0.03602 | -1.9        | tumor necrosis factor receptor superfamily, member 19                           |
| Ptprd      | BC025145  | Mm.184021 | 1   | 522      | 118       | 321      | 18        | 0.02047 | -1.62       | protein tyrosine phosphatase, receptor type, D                                  |
| Trfr       | BB810450  | Mm.28683  | 0.7 | 163      | 14        | 101      | 21        | 0.02079 | -1.61       | transferrin receptor                                                            |
| Ghr        | BC024375  | Mm.3986   | 1   | 3469     | 729       | 2256     | 320       | 0.01781 | -1.54       | GH RECEPTOR                                                                     |
| Chrna1     | NM_007389 | Mm.4583   | 1   | 708      | 84        | 1066     | 157       | 0.03625 | 1.5         | cholinergic receptor, nicotinic, alpha polypeptide 1 (muscle)                   |
| Adrb2      | AV083350  | Mm.5598   | 1   | 924      | 185       | 1400     | 78        | 0.00236 | 1.52        | adrenergic receptor, beta 2                                                     |
| Itpr1      | NM_008789 | Mm.2726   | 1   | 1524     | 166       | 2341     | 80        | 0.00009 | 1.54        | inositol 1,4,5-triphosphate receptor 1                                          |
| Clqr1      | NM_010740 | Mm.681    | 1   | 1655     | 395       | 2555     | 448       | 0.04556 | 1.54        | complement component 1, q subcomponent, receptor 1                              |
| Robo4      | BC020129  | Mm.293315 | 1   | 811      | 218       | 1246     | 100       | 0.00863 | 1.54        | roundabout homolog 4 (Drosophila)                                               |
| Gucy1b3    | BF472806  | Mm.9445   | 1   | 375      | 96        | 589      | 110       | 0.04999 | 1.57        | guanylate cyclase 1, soluble, beta 3, nitric oxide mediated signal transduction |
| Acvr1      | NM_007394 | Mm.689    | 1   | 643      | 294       | 1031     | 131       | 0.04335 | 1.6         | activin A receptor, type 1                                                      |
| Trpm7      | AF376052  | Mm.244705 | 1   | 755      | 266       | 1212     | 115       | 0.0154  | 1.61        | transient receptor potential cation channel, subfamily M, member 7              |
| Trip10     | NM_134125 | Mm.37368  | 1   | 3924     | 1006      | 6387     | 1276      | 0.04634 | 1.63        | thyroid hormone receptor interactor 10                                          |
| Tie1       | NM_011587 | Mm.4345   | 1   | 540      | 137       | 886      | 90        | 0.00517 | 1.64        | tyrosine kinase receptor 1                                                      |
| Ptger4     | NM_008965 | Mm.18509  | 1   | 52       | 14        | 88       | 8         | 0.0043  | 1.67        | prostaglandin E receptor 4 (subtype EP4)                                        |
| Flt1       | NM_010228 | Mm.3464   | 1   | 1321     | 334       | 2330     | 287       | 0.00635 | 1.76        | FMS-like tyrosine kinase 1                                                      |
| Obrgrp     | AV156961  | Mm.4756   | 1   | 266      | 81        | 483      | 7         | 0.0041  | 1.82        | leptin receptor gene-related protein                                            |
| Ntsr2      | NM_008747 | Mm.281715 | 1   | 328      | 90        | 611      | 52        | 0.00138 | 1.86        | neurotensin receptor 2                                                          |
| Tnfrsf21   | BG972377  | Mm.200792 | 1   | 940      | 163       | 1789     | 235       | 0.01185 | 1.9         | tumor necrosis factor receptor superfamily, member 21                           |
| Chrne      | NM_009603 | Mm.4980   | 1   | 362      | 172       | 785      | 98        | 0.00454 | 2.17        | cholinergic receptor, nicotinic, epsilon polypeptide                            |

#### SIGNAL TRANSDUCTION

| GeneSymbol | Genbank  | Unigene   | A/P | Ctl Mean | Ctl stdev | Exp Mean | Exp stdev | P-value | Fold Change | Gene Description                              |
|------------|----------|-----------|-----|----------|-----------|----------|-----------|---------|-------------|-----------------------------------------------|
| Gadd45g    | AK007410 | Mm.281298 | 1   | 5994     | 742       | 2427     | 1029      | 0.01352 | -2.47       | growth arrest and DNA-damage-inducible, gamma |
| Irak1      | BY141014 | Mm.38241  | 1   | 350      | 88        | 167      | 79        | 0.02971 | -2.09       | interleukin-1 receptor-associated kinase 1    |
| Ccl9       | AF128196 | Mm.2271   | 1   | 948      | 200       | 513      | 117       | 0.00827 | -1.85       | chemokine (C-C motif) ligand 9                |
| Jun        | BC002081 | Mm.275071 | 1   | 8412     | 1594      | 4708     | 1507      | 0.02166 | -1.79       | Jun oncogene                                  |

|          |           |           |     |      |      |      |     |         |       |                                                                            |
|----------|-----------|-----------|-----|------|------|------|-----|---------|-------|----------------------------------------------------------------------------|
| Ptk9l    | AK002699  | Mm.274346 | 1   | 5320 | 1138 | 3322 | 595 | 0.01745 | -1.6  | Ptk9l: protein tyrosine kinase 9-like (A6-related protein)                 |
| Mapk1    | NM_011949 | Mm.196581 | 1   | 745  | 146  | 472  | 139 | 0.04675 | -1.58 | mitogen activated protein kinase 1                                         |
| Map3k7   | BF019409  | Mm.258589 | 1   | 159  | 23   | 103  | 25  | 0.03534 | -1.55 | mitogen-activated protein kinase kinase kinase 7                           |
| Pxn      | BC025493  | Mm.18714  | 1   | 1000 | 179  | 1509 | 193 | 0.02097 | 1.51  | paxillin                                                                   |
| Stk2     | BI111765  | Mm.281011 | 1   | 748  | 111  | 1130 | 94  | 0.00359 | 1.51  | serine/threonine kinase 2                                                  |
| Stmn2    | BM946869  | Mm.29580  | 0.8 | 387  | 174  | 604  | 52  | 0.04873 | 1.56  | stathmin-like 2                                                            |
| Lcp2     | BC006948  | Mm.265350 | 0.8 | 100  | 34   | 158  | 12  | 0.02026 | 1.57  | lymphocyte cytosolic protein 2                                             |
| Slc9a3r2 | BY079474  | Mm.21587  | 1   | 1866 | 293  | 2987 | 72  | 0.00045 | 1.6   | solute carrier family 9 (sodium/hydrogen exchanger), isoform 3 regulator 2 |
| Prkcq    | AB062122  | Mm.329993 | 1   | 1911 | 304  | 3099 | 570 | 0.04461 | 1.62  | protein kinase C, theta                                                    |
| Traf2    | BC003801  | Mm.3399   | 1   | 397  | 106  | 644  | 66  | 0.00664 | 1.62  | Tnf receptor-associated factor 2                                           |
| Grb2     | NM_008163 | Mm.6900   | 0.6 | 819  | 266  | 1333 | 155 | 0.01365 | 1.63  | growth factor receptor bound protein 2                                     |
| Prkch    | NM_008856 | Mm.8040   | 1   | 591  | 174  | 967  | 108 | 0.00957 | 1.63  | protein kinase C, eta                                                      |
| Lyn      | M57697    | Mm.1834   | 0.7 | 583  | 184  | 997  | 107 | 0.00692 | 1.71  | Yamaguchi sarcoma viral (v-yes-1) oncogene homolog                         |
| Dusp6    | NM_026268 | Mm.1791   | 1   | 486  | 101  | 857  | 129 | 0.01318 | 1.76  | dual specificity phosphatase 6                                             |
| Camk2b   | NM_007595 | Mm.4857   | 1   | 783  | 129  | 1396 | 234 | 0.02524 | 1.78  | calcium/calmodulin-dependent protein kinase II, beta                       |
| Dusp7    | BC025048  | Mm.275584 | 1   | 590  | 181  | 1058 | 137 | 0.00925 | 1.79  | dual specificity phosphatase 7                                             |
| Evl      | AW553781  | Mm.238841 | 1   | 171  | 98   | 321  | 42  | 0.02478 | 1.88  | Ena-vasodilator stimulated phosphoprotein                                  |

#### POST TRANSLATIONAL MODIFICATION

| GeneSymbol | Genbank   | Unigene   | A/P | Ctl Mean | Ctl stdev | Exp Mean | Exp stdev | P-value | Fold Change | Gene Description                                     |
|------------|-----------|-----------|-----|----------|-----------|----------|-----------|---------|-------------|------------------------------------------------------|
| Rps6ka3    | BY079468  | Mm.24436  | 1   | 445      | 96        | 243      | 81        | 0.02471 | -1.83       | ribosomal protein S6 kinase polypeptide 3            |
| Adk        | NM_007411 | Mm.30346  | 0.6 | 292      | 89        | 160      | 19        | 0.02484 | -1.82       | adenosine kinase                                     |
| Styx       | AK006627  | Mm.202561 | 1   | 624      | 142       | 375      | 24        | 0.0188  | -1.67       | phosphoserine/threonine/tyrosine interaction protein |
| Prkx       | BB367549  | Mm.290338 | 1   | 295      | 82        | 179      | 36        | 0.0346  | -1.64       | putative serine/threonine kinase                     |
| Myk        | BF451748  | Mm.247544 | 1   | 1844     | 234       | 2800     | 208       | 0.00186 | 1.52        | myosin, light polypeptide kinase                     |
| Padi2      | NM_008812 | Mm.2296   | 1   | 2984     | 680       | 4559     | 328       | 0.0046  | 1.53        | peptidyl arginine deiminase, type II                 |
| Ptpla      | BB014781  | Mm.241205 | 1   | 3626     | 720       | 5636     | 462       | 0.00299 | 1.55        | protein tyrosine phosphatase-like, member a          |
| Snrk       | NM_133741 | Mm.257989 | 1   | 2395     | 303       | 3729     | 410       | 0.01643 | 1.56        | SNF related kinase                                   |
| Hipk1      | AF071070  | Mm.20827  | 1   | 2680     | 413       | 4327     | 358       | 0.00195 | 1.61        | homeodomain interacting protein kinase 1             |
| Apeg1      | AF215896  | Mm.275397 | 1   | 7068     | 709       | 11628    | 1319      | 0.01168 | 1.64        | aortic preferentially expressed gene 1               |
| Mapkapk5   | NM_010765 | Mm.272206 | 1   | 1328     | 252       | 2611     | 352       | 0.01175 | 1.97        | MAP kinase-activated protein kinase 5                |
| Prkcl1     | AI463328  | Mm.213000 | 0.8 | 203      | 57        | 407      | 35        | 0.00083 | 2           | protein kinase C-like 1                              |
| Map2k6     | BB261602  | Mm.14487  | 1   | 839      | 178       | 1717     | 183       | 0.0027  | 2.05        | mitogen activated protein kinase kinase 6            |
| Dm15       | AW108486  | Mm.301960 | 1   | 2844     | 1024      | 6285     | 561       | 0.00086 | 2.21        | dystrophia myotonica-protein kinase                  |
| Apeg1      | AF215896  | Mm.275397 | 1   | 501      | 94        | 1161     | 6         | 0.0001  | 2.32        | aortic preferentially expressed gene 1               |

#### SMALL GTPase MEDIATED SIGNAL TRANSDUCTION

| GeneSymbol | Genbank   | Unigene   | A/P | Ctl Mean | Ctl stdev | Exp Mean | Exp stdev | P-value | Fold Change | Gene Description                                            |
|------------|-----------|-----------|-----|----------|-----------|----------|-----------|---------|-------------|-------------------------------------------------------------|
| Rab32      | NM_026405 | Mm.31486  | 0.8 | 263      | 104       | 110      | 16        | 0.03332 | -2.38       | RAB32, member RAS oncogene family                           |
| Rab2       | C80220    | Mm.331473 | 0.9 | 129      | 54        | 61       | 15        | 0.04516 | -2.12       | RAB2, member RAS oncogene family                            |
| Arhgap5    | BY014451  | Mm.35059  | 1   | 361      | 75        | 225      | 70        | 0.04845 | -1.61       | Rho GTPase activating protein 5                             |
| Arf6       | BC003478  | Mm.27308  | 1   | 1168     | 226       | 1784     | 253       | 0.02588 | 1.53        | ADP-ribosylation factor 6                                   |
| Rab40b     | AV364488  | Mm.281639 | 1   | 360      | 145       | 573      | 83        | 0.03899 | 1.59        | Rab40b, member RAS oncogene family                          |
| Hras1      | NM_008284 | Mm.334313 | 1   | 2716     | 161       | 4538     | 601       | 0.03587 | 1.67        | Harvey rat sarcoma virus oncogene 1                         |
| Rras       | NM_009101 | Mm.257    | 1   | 2247     | 185       | 3795     | 362       | 0.00629 | 1.69        | Harvey rat sarcoma oncogene, subgroup R                     |
| Map4k3     | BF165548  | Mm.251706 | 1   | 1111     | 124       | 1921     | 182       | 0.00651 | 1.73        | mitogen-activated protein kinase kinase kinase 3            |
| Abr        | AV325116  | Mm.258939 | 0.8 | 137      | 31        | 237      | 15        | 0.001   | 1.73        | active BCR-related gene                                     |
| Rab5c      | BC023027  | Mm.29829  | 1   | 1212     | 527       | 2118     | 251       | 0.01706 | 1.75        | RAB5C, member RAS oncogene family                           |
| Rgrip1     | NM_023879 | Mm.21662  | 1   | 736      | 397       | 1370     | 76        | 0.0259  | 1.86        | retinitis pigmentosa GTPase regulator interacting protein 1 |

#### MITOCHONDRIAL

| GeneSymbol | Genbank   | Unigene   | A/P | Ctl Mean | Ctl stdev | Exp Mean | Exp stdev | P-value | Fold Change | Gene Description                                                |
|------------|-----------|-----------|-----|----------|-----------|----------|-----------|---------|-------------|-----------------------------------------------------------------|
| Slc25a10   | BC003222  | Mm.3991   | 0.6 | 505      | 354       | 55       | 43        | 0.04861 | -9.06       | solute carrier family 25, member 10                             |
| Cyp27a1    | NM_024264 | Mm.85083  | 1   | 6925     | 1800      | 2650     | 559       | 0.00437 | -2.61       | cytochrome P450, family 27, subfamily a, polypeptide 1          |
| Mte1       | NM_134188 | Mm.45431  | 1   | 2831     | 1037      | 1253     | 364       | 0.02689 | -2.26       | mitochondrial acyl-CoA thioesterase 1                           |
| Mte1       | NM_134188 | Mm.45431  | 1   | 1051     | 223       | 532      | 187       | 0.017   | -1.97       | mitochondrial acyl-CoA thioesterase 1                           |
| Gstk1      | AK002661  | Mm.267014 | 1   | 3302     | 623       | 1785     | 411       | 0.00608 | -1.85       | glutathione S-transferase kappa 1                               |
| Tfb1m      | AI429207  | Mm.226554 | 1   | 409      | 53        | 231      | 35        | 0.00126 | -1.77       | transcription factor B1, mitochondrial                          |
| Slc40a1    | BC003438  | Mm.28756  | 1   | 3257     | 552       | 1864     | 175       | 0.00342 | -1.75       | solute carrier family 40 (iron-regulated transporter), member 1 |
| Slc25a20   | AV008091  | Mm.29666  | 1   | 4007     | 663       | 2485     | 287       | 0.00423 | -1.61       | solute carrier family 25, member 20                             |
| Kif1b      | AF090190  | Mm.252497 | 1   | 2647     | 380       | 4273     | 674       | 0.03146 | 1.61        | kinesin family member 1B                                        |
| Bcl2l      | BM228788  | Mm.238213 | 1   | 959      | 348       | 1730     | 272       | 0.01766 | 1.8         | Bcl2-like                                                       |

**MEMBRANE**

| GeneSymbol | Genbank   | Unigene   | A/P | Ctl Mean | Ctl stdev | Exp Mean | Exp stdev | P-value | Fold Change | Gene Description                                                                |
|------------|-----------|-----------|-----|----------|-----------|----------|-----------|---------|-------------|---------------------------------------------------------------------------------|
| Gjb1       | BC026833  | Mm.21198  | 0.6 | 1393     | 908       | 206      | 90        | 0.04425 | -6.76       | gap junction membrane channel protein beta 1                                    |
| Slc6a6     | AA589629  | Mm.247352 | 0.6 | 231      | 125       | 43       | 48        | 0.02419 | -5.31       | solute carrier family 6 (neurotransmitter transporter, taurine), member 6       |
| Kcnab1     | AK015412  | Mm.1438   | 0.6 | 660      | 299       | 227      | 63        | 0.02642 | -2.9        | potassium channel regulator activity                                            |
| Ocnl       | NM_053109 | Mm.197536 | 0.8 | 1372     | 522       | 535      | 129       | 0.019   | -2.56       | osteoclast inhibitory lectin                                                    |
| Ceacam1    | NM_011926 | Mm.292910 | 1   | 1285     | 469       | 526      | 151       | 0.02069 | -2.44       | CEA-related cell adhesion molecule 1                                            |
| Slc12a2    | BG069726  | Mm.4168   | 1   | 1018     | 348       | 437      | 71        | 0.01562 | -2.32       | solute carrier family 12, member 2                                              |
| Ceacam1    | NM_011926 | Mm.292910 | 1   | 1492     | 553       | 649      | 284       | 0.02974 | -2.3        | CEA-related cell adhesion molecule 1                                            |
| Mr1        | BB210729  | Mm.7580   | 1   | 1111     | 371       | 518      | 39        | 0.02424 | -2.14       | major histocompatibility complex, class I-related                               |
| Slc16a2    | NM_009197 | Mm.5045   | 1   | 408      | 162       | 193      | 30        | 0.04526 | -2.11       | solute carrier family 16 (monocarboxylic acid transporters), member 2           |
| Insig2     | AV257512  | Mm.27136  | 1   | 3706     | 1507      | 1797     | 389       | 0.04349 | -2.06       | insulin induced gene 2                                                          |
| Mr1        | U94989    | Mm.7580   | 0.8 | 769      | 207       | 409      | 33        | 0.0192  | -1.88       | major histocompatibility complex, class I-related                               |
| Ceacam1    | BC016891  | Mm.14114  | 0.5 | 380      | 135       | 208      | 33        | 0.0425  | -1.83       | CEA-related cell adhesion molecule 1                                            |
| Ceacam1    | X67278    | Mm.292910 | 0.6 | 320      | 59        | 174      | 72        | 0.04317 | -1.83       | CEA-related cell adhesion molecule 1                                            |
| Tgoln1     | NM_009443 | Mm.246563 | 1   | 647      | 158       | 372      | 65        | 0.0141  | -1.74       | trans-golgi network protein                                                     |
| Clcn4-2    | NM_011334 | Mm.297883 | 1   | 1311     | 266       | 758      | 230       | 0.02691 | -1.73       | chloride channel 4-2                                                            |
| Slc22a5    | AF111425  | Mm.42253  | 0.7 | 558      | 170       | 334      | 69        | 0.04099 | -1.67       | solute carrier family 22 (organic cation transporter), member 5                 |
| Copb2      | AV109541  | Mm.18729  | 1   | 421      | 103       | 254      | 43        | 0.01902 | -1.66       | coatamer protein complex, subunit beta 2 (beta prime)                           |
| Gdap1      | BB278235  | Mm.18218  | 0.8 | 235      | 39        | 147      | 30        | 0.01648 | -1.6        | ganglioside-induced differentiation-associated-protein 1                        |
| Slc19a2    | AF326916  | Mm.35444  | 1   | 569      | 94        | 360      | 90        | 0.03568 | -1.58       | solute carrier family 19 (thiamine transproter), member 2                       |
| H47        | CA565598  | Mm.22362  | 1   | 642      | 94        | 418      | 91        | 0.02965 | -1.54       | histocompatibility 47                                                           |
| Kcnn2      | NM_080465 | Mm.246319 | 0.8 | 255      | 56        | 169      | 31        | 0.03216 | -1.51       | K intermediate/small conductance ca-activated channel, subfamily N, mem 2       |
| Gcxc       | AV370848  | Mm.19937  | 0.7 | 309      | 52        | 204      | 16        | 0.00895 | -1.51       | gamma-glutamyl carboxylase                                                      |
| Atp1b2     | BG261955  | Mm.132333 | 1   | 4560     | 831       | 6871     | 886       | 0.02173 | 1.51        | ATPase, Na+/K+ transporting, beta 2 polypeptide                                 |
| Slc7a10    | NM_017394 | Mm.35567  | 1   | 533      | 165       | 813      | 109       | 0.02811 | 1.52        | solute carrier family 7 (cationic amino acid transporter, y+ system), member 10 |
| Tm4sf2     | NM_019634 | Mm.18590  | 1   | 3699     | 730       | 5655     | 406       | 0.00281 | 1.53        | transmembrane 4 superfamily member 2                                            |
| Mg29       | NM_008596 | Mm.20942  | 1   | 2509     | 259       | 3876     | 479       | 0.01978 | 1.54        | mitsugumin 29                                                                   |
| Daf1       | BM208097  | Mm.337491 | 1   | 1156     | 143       | 1780     | 244       | 0.02749 | 1.54        | decay accelerating factor 1                                                     |
| Cnp1       | NM_009923 | Mm.15711  | 1   | 573      | 62        | 886      | 117       | 0.02399 | 1.54        | cyclic nucleotide phosphodiesterase 1                                           |
| Tpst2      | NM_009419 | Mm.250631 | 1   | 644      | 45        | 995      | 132       | 0.04724 | 1.55        | tyrosylprotein sulfotransferase 2                                               |
| Gpsn2      | AK020708  | Mm.209651 | 1   | 20476    | 1903      | 31847    | 1975      | 0.00133 | 1.56        | glycoprotein, synaptic 2                                                        |
| Esam1      | AF361882  | Mm.41751  | 1   | 2234     | 242       | 3486     | 94        | 0.00005 | 1.56        | endothelial cell-specific adhesion molecule                                     |
| Vat1       | BC025496  | Mm.29210  | 1   | 323      | 15        | 508      | 52        | 0.02762 | 1.57        | vesicle amine transport protein 1 homolog (T californica)                       |
| Atp1b1     | AV152334  | Mm.4550.6 | 1   | 4133     | 1665      | 6497     | 771       | 0.03452 | 1.57        | ATPase, Na+/K+ transporting, beta 1 polypeptide                                 |
| Vamp3      | BB491065  | Mm.273930 | 1   | 373      | 53        | 589      | 4         | 0.00086 | 1.58        | vesicle-associated membrane protein 3                                           |
| IgSF4      | BB832194  | Mm.234832 | 1   | 511      | 99        | 811      | 49        | 0.0013  | 1.59        | immunoglobulin superfamily, member 4                                            |
| Kcna7      | NM_010596 | Mm.12955  | 1   | 2611     | 626       | 4175     | 776       | 0.04156 | 1.6         | potassium voltage-gated channel, shaker-related subfamily, member 7             |
| Atp1b4     | NM_133690 | Mm.60134  | 1   | 226      | 81        | 362      | 25        | 0.01852 | 1.6         | ATPase, (Na+)/K+ transporting, beta 4 polypeptide                               |
| Golga4     | NM_018748 | Mm.10409  | 1   | 2105     | 614       | 3455     | 393       | 0.00911 | 1.64        | golgi autoantigen, golgin subfamily a, 4                                        |
| Gja4       | AF216832  | Mm.24615  | 0.5 | 359      | 71        | 592      | 43        | 0.00124 | 1.65        | gap junction membrane channel protein alpha 4                                   |
| Adam15     | BB392633  | Mm.274049 | 1   | 1474     | 525       | 2473     | 245       | 0.01082 | 1.68        | a disintegrin and metalloproteinase domain 15 (metargidin)                      |
| Tmem2      | BB667229  | Mm.258163 | 1   | 369      | 19        | 625      | 39        | 0.00182 | 1.69        | transmembrane protein 2                                                         |
| Mcl1       | CA577851  | Mm.1639   | 1   | 4059     | 1244      | 6928     | 894       | 0.0092  | 1.71        | myeloid cell leukemia sequence 1                                                |
| Cacng1     | NM_007582 | Mm.57093  | 1   | 5826     | 843       | 10072    | 1810      | 0.03157 | 1.73        | calcium channel, voltage-dependent, gamma subunit 1                             |
| Mal        | NM_010762 | Mm.39040  | 1   | 283      | 91        | 500      | 38        | 0.00336 | 1.77        | myelin and lymphocyte protein, T-cell differentiation protein                   |
| Trdn       | AF223416  | Mm.216837 | 1   | 603      | 232       | 1072     | 33        | 0.0114  | 1.78        | triadin                                                                         |
| Slc16a3    | NM_030696 | Mm.28632  | 1   | 6043     | 2204      | 10954    | 2043      | 0.02417 | 1.81        | solute carrier family 16 (monocarboxylic acid transporters), member 3           |
| Gpsn2      | NM_134118 | Mm.209651 | 1   | 8778     | 399       | 16045    | 1287      | 0.01089 | 1.83        | glycoprotein, synaptic 2                                                        |
| Mcl1       | CA577851  | Mm.1639   | 1   | 4613     | 2122      | 8425     | 1044      | 0.01467 | 1.83        | myeloid cell leukemia sequence 1                                                |
| Tm7sf1     | AW546472  | Mm.11780  | 1   | 55       | 21        | 101      | 14        | 0.01052 | 1.83        | transmembrane 7 superfamily member 1                                            |
| Aqp4       | BB193413  | Mm.298599 | 1   | 290      | 107       | 906      | 188       | 0.01397 | 3.12        | Mus musculus similar to putative pheromone receptor (LOC224572), mRNA           |
| Mpz        | BY229830  | Mm.9986   | 1   | 808      | 424       | 2827     | 565       | 0.01276 | 3.5         | myelin protein zero                                                             |

**NUCLEIC ACID ASSOCIATED PROTEINS**

| GeneSymbol | Genbank   | Unigene   | A/P | Ctl Mean | Ctl stdev | Exp Mean | Exp stdev | P-value | Fold Change | Gene Description                                |
|------------|-----------|-----------|-----|----------|-----------|----------|-----------|---------|-------------|-------------------------------------------------|
| Dnase1     | BC014718  | Mm.239992 | 0.6 | 477      | 287       | 85       | 64        | 0.03288 | -5.6        | deoxyribonuclease I                             |
| Cova1      | BC025915  | Mm.24550  | 1   | 552      | 147       | 162      | 76        | 0.00267 | -3.39       | cytosolic ovarian carcinoma antigen 1           |
| Cova1      | BC026450  | Mm.24550  | 1   | 1070     | 285       | 434      | 18        | 0.00768 | -2.46       | cytosolic ovarian carcinoma antigen 1           |
| Nol5       | BB729616  | Mm.220367 | 1   | 376      | 113       | 197      | 56        | 0.02516 | -1.9        | nucleolar protein 5                             |
| Ssa2       | BG069917  | Mm.40370  | 0.8 | 275      | 61        | 155      | 19        | 0.01015 | -1.77       | Sjogren syndrome antigen A2                     |
| Gadd45a    | NM_007836 | Mm.1236   | 1   | 879      | 174       | 505      | 122       | 0.01211 | -1.74       | growth arrest and DNA-damage-inducible 45 alpha |
| Rbbp4      | BF011461  | Mm.12145  | 1   | 1289     | 207       | 832      | 232       | 0.04892 | -1.55       | retinoblastoma binding protein 4                |
| U2af1      | NM_024187 | Mm.259570 | 1   | 1937     | 409       | 1250     | 185       | 0.01776 | -1.55       | U2(RNU2) small nuclear RNA auxiliary factor 1   |

|          |           |           |   |      |     |      |     |         |      |                                                     |
|----------|-----------|-----------|---|------|-----|------|-----|---------|------|-----------------------------------------------------|
| Dhx16    | BB379386  | Mm.5624   | 1 | 1754 | 307 | 2656 | 212 | 0.00273 | 1.51 | DEAH (Asp-Glu-Ala-His) box polypeptide 16           |
| Rad23b   | BF138887  | Mm.196846 | 1 | 3248 | 845 | 5109 | 586 | 0.0105  | 1.57 | RAD23b homolog (S. cerevisiae)                      |
| Lrrfip1  | NM_008515 | Mm.45039  | 1 | 1403 | 204 | 2210 | 390 | 0.0452  | 1.57 | leucine rich repeat (in FLII) interacting protein 1 |
| Eif4e13  | BM120823  | Mm.227183 | 1 | 393  | 100 | 615  | 55  | 0.00701 | 1.57 | eukaryotic translation initiation factor 4E like 3  |
| Hist1h4h | BC028550  | Mm.158272 | 1 | 761  | 369 | 163  | 64  | 0.04799 | 1.63 | histone 1, H4h                                      |
| Cpeb3    | BB249892  | Mm.206779 | 1 | 767  | 222 | 1255 | 184 | 0.02045 | 1.63 | cytoplasmic polyadenylation element binding protein |
| Polr2a   | U37500    | Mm.16533  | 1 | 1359 | 295 | 2663 | 510 | 0.02741 | 1.96 | polymerase (RNA) II (DNA directed) polypeptide A    |

#### PROTEIN CATABOLISM

| GeneSymbol | Genbank   | Unigene   | A/P | Ctl Mean | Ctl stdev | Exp Mean | Exp stdev | P-value | Fold Change | Gene Description                                              |
|------------|-----------|-----------|-----|----------|-----------|----------|-----------|---------|-------------|---------------------------------------------------------------|
| Serpina3k  | BF234005  | Mm.196242 | 0.6 | 392      | 226       | 100      | 49        | 0.0389  | -3.91       | serine (or cysteine) proteinase inhibitor, clade A, member 3K |
| Birc4      | NM_009688 | Mm.259879 | 1   | 135      | 29        | 46       | 10        | 0.00171 | -2.9        | baculoviral IAP repeat-containing 4                           |
| Serpinf1   | AK012411  | Mm.2044.2 | 1   | 3812     | 1167      | 1607     | 349       | 0.01096 | -2.37       | serine or cysteine proteinase inhibitor, clade F, member 1    |
| Bace       | CA563079  | Mm.24044  | 1   | 459      | 91        | 246      | 76        | 0.01644 | -1.86       | beta-site APP cleaving enzyme                                 |
| Mib1       | BC011287  | Mm.21500  | 1   | 651      | 148       | 359      | 16        | 0.01222 | -1.81       | mindbomb homolog 1 (Drosophila)                               |
| Ctse       | NM_007799 | Mm.230249 | 1   | 741      | 224       | 434      | 12        | 0.03809 | -1.7        | cathepsin E                                                   |
| Psmid8     | AK003436  | Mm.273152 | 1   | 11518    | 1033      | 7089     | 1243      | 0.00657 | -1.62       | proteasome (prosome, macropain) 26S subunit, non-ATPase, 8    |
| Fbxo21     | BC021871  | Mm.21912  | 1   | 989      | 74        | 611      | 156       | 0.02947 | -1.62       | F-box only protein 21                                         |
| Pace4      | BI157485  | Mm.294007 | 1   | 1228     | 205       | 773      | 190       | 0.02488 | -1.59       | paired basic amino acid cleaving system 4                     |
| Ube4a      | BC006649  | Mm.215069 | 1   | 774      | 86        | 491      | 51        | 0.00117 | -1.58       | ubiquitination factor E4A, UFD2 homolog (S. cerevisiae)       |
| Skp1a      | BI079132  | Mm.42944  | 1   | 9063     | 506       | 5998     | 432       | 0.00027 | -1.51       | S-phase kinase-associated protein 1A                          |
| Siah1a     | AV008871  | Mm.6765   | 1   | 727      | 148       | 1100     | 183       | 0.04031 | 1.51        | seven in absentia 1A                                          |
| Timp4      | BI788452  | Mm.255607 | 1   | 2372     | 247       | 3668     | 231       | 0.00067 | 1.55        | tissue inhibitor of metalloproteinase 4                       |
| Lcn7       | BC005738  | Mm.15801  | 1   | 2030     | 347       | 3232     | 369       | 0.01038 | 1.59        | lipocalin 7                                                   |
| Serpinel1  | NM_008871 | Mm.250422 | 1   | 586      | 137       | 976      | 106       | 0.00652 | 1.66        | serine (or cysteine) proteinase inhibitor, clade E, member 1  |
| Herc2      | AW701798  | Mm.20929  | 1   | 772      | 214       | 1359     | 199       | 0.01117 | 1.76        | hect domain and RCC1 (CHC1)-like domain (RLD) 2               |

#### MISCELLANEOUS

| GeneSymbol | Genbank   | Unigene   | A/P | Ctl Mean | Ctl stdev | Exp Mean | Exp stdev | P-value | Fold Change | Gene Description                                                 |
|------------|-----------|-----------|-----|----------|-----------|----------|-----------|---------|-------------|------------------------------------------------------------------|
| Cp         | BY013791  | Mm.13787  | 1   | 1368     | 758       | 307      | 140       | 0.03823 | -4.45       | ceruloplasmin                                                    |
| Brap       | NM_028227 | Mm.153372 | 0.8 | 356      | 119       | 107      | 90        | 0.02067 | -3.33       | BRCA1 associated protein                                         |
| Sh3d19     | NM_012059 | Mm.2454   | 1   | 174      | 75        | 54       | 42        | 0.02855 | -3.21       | SH3 domain protein D19                                           |
| Lor        | AI036317  | Mm.1121   | 0.7 | 540      | 177       | 178      | 139       | 0.02406 | -3.03       | loricrin                                                         |
| Idi1       | BC004801  | Mm.29847  | 1   | 143      | 60        | 57       | 7         | 0.03434 | -2.5        | isopentenyl-diphosphate delta isomerase                          |
| Gnpnat1    | AK008566  | Mm.233534 | 1   | 688      | 314       | 282      | 38        | 0.04612 | -2.44       | glucosamine-phosphate N-acetyltransferase 1                      |
| Gclc       | BC019374  | Mm.89888  | 1   | 1297     | 571       | 533      | 77        | 0.0423  | -2.43       | glutamate-cysteine ligase, catalytic subunit                     |
| Cfh        | AI987976  | Mm.8655   | 1   | 270      | 88        | 131      | 30        | 0.0234  | -2.06       | complement component factor h                                    |
| Asb4       | AV113827  | Mm.306134 | 1   | 718      | 172       | 352      | 40        | 0.00613 | -2.04       | ankyrin repeat and SOCS box-containing protein                   |
| Tekt1      | AK005801  | Mm.42257  | 0.8 | 245      | 65        | 121      | 49        | 0.02969 | -2.02       | tektin 1                                                         |
| Qscn6      | NM_023268 | Mm.27035  | 1   | 1453     | 477       | 735      | 323       | 0.04453 | -1.98       | quiescin Q6                                                      |
| Sh3d1B     | AI326108  | Mm.139128 | 0.8 | 185      | 47        | 94       | 42        | 0.03861 | -1.95       | SH3 domain protein 1B                                            |
| Asb4       | AV302111  | Mm.306134 | 1   | 1145     | 288       | 625      | 70        | 0.01202 | -1.83       | ankyrin repeat and SOCS box-containing protein                   |
| Hspca      | C77384    | Mm.1843   | 1   | 1680     | 310       | 928      | 278       | 0.01657 | -1.81       | heat shock protein 1, alpha                                      |
| Sh3d19     | NM_012059 | Mm.2454   | 1   | 844      | 237       | 477      | 130       | 0.03044 | -1.77       | SH3 domain protein D19                                           |
| Gclc       | AW825835  | Mm.305531 | 1   | 1321     | 411       | 784      | 120       | 0.04136 | -1.68       | glutamate-cysteine ligase, catalytic subunit                     |
| Gltscr2    | BC017637  | Mm.277634 | 1   | 1350     | 343       | 838      | 182       | 0.03343 | -1.61       | glioma tumor suppressor candidate region gene 2                  |
| Hspa5      | AJ002387  | Mm.330160 | 1   | 3226     | 884       | 2035     | 122       | 0.04134 | -1.59       | heat shock 70kDa protein 5                                       |
| Tes3       | AV048122  | Mm.30127  | 1   | 550      | 57        | 358      | 42        | 0.00163 | -1.54       | testis derived transcript 3                                      |
| Sepr       | NM_013759 | Mm.28212  | 1   | 7339     | 1446      | 4812     | 175       | 0.01816 | -1.53       | selenoprotein R                                                  |
| Cdadc1     | BB222482  | Mm.2046   | 1   | 853      | 87        | 559      | 67        | 0.00311 | -1.53       | cytidine and dCMP deaminase domain containing 1                  |
| Epc1       | NM_007935 | Mm.20828  | 1   | 1756     | 352       | 2642     | 140       | 0.00244 | 1.5         | enhancer of polycomb homolog 1 (Drosophila)                      |
| Hn1        | BI453712  | Mm.1775   | 1   | 1286     | 79        | 1949     | 102       | 0.00238 | 1.52        | hematological and neurological expressed sequence 1              |
| Sec14l1    | BI652727  | Mm.272312 | 1   | 2674     | 473       | 4054     | 202       | 0.00126 | 1.52        | SEC14-like 1 (S. cerevisiae)                                     |
| Fkbp5      | BC015260  | Mm.276405 | 1   | 4752     | 589       | 7276     | 630       | 0.00494 | 1.53        | FK506 binding protein 5                                          |
| Mln51      | NM_138660 | Mm.40120  | 1   | 1081     | 353       | 1661     | 233       | 0.03152 | 1.54        | MLN51 protein                                                    |
| Epb4.1     | BC017137  | Mm.30038  | 1   | 1242     | 96        | 1916     | 32        | 0.00003 | 1.54        | erythrocyte protein band 4.1                                     |
| Sav1       | NM_022028 | Mm.27514  | 1   | 1591     | 428       | 2474     | 338       | 0.0233  | 1.55        | salvador homolog 1 (Drosophila)                                  |
| Rapsn      | NM_009023 | Mm.1272   | 1   | 659      | 81        | 1025     | 132       | 0.02304 | 1.55        | receptor-associated protein of the synapse                       |
| Tubgcp3    | BC025647  | Mm.246402 | 1   | 243      | 74        | 382      | 70        | 0.04603 | 1.57        | tubulin, gamma complex associated protein 3                      |
| Cryab      | AV016515  | Mm.178    | 1   | 12417    | 1905      | 19650    | 2515      | 0.0232  | 1.58        | crystallin, alpha B                                              |
| Nical      | NM_138315 | Mm.290431 | 0.7 | 154      | 62        | 246      | 6         | 0.03257 | 1.59        | NEDD9 interacting protein with calponin homology and LIM domains |
| Ndr4       | AI837704  | Mm.29846  | 0.7 | 200      | 90        | 321      | 41        | 0.04169 | 1.6         | N-myc downstream regulated 4                                     |
| Wdr6       | NM_031392 | Mm.335454 | 1   | 375      | 109       | 604      | 85        | 0.02119 | 1.61        | WD repeat domain 6                                               |
| Macf1      | BM248206  | Mm.3350   | 0.5 | 907      | 206       | 1473     | 199       | 0.01849 | 1.62        | microtubule-actin crosslinking factor 1                          |

|        |           |           |     |      |      |       |     |         |      |                                                              |
|--------|-----------|-----------|-----|------|------|-------|-----|---------|------|--------------------------------------------------------------|
| Catns  | NM_007615 | Mm.35738  | 1   | 818  | 259  | 1380  | 105 | 0.00516 | 1.69 | catenin (cadherin associated protein), delta 1               |
| Mt1    | NM_013602 | Mm.192991 | 1   | 8942 | 2821 | 15322 | 469 | 0.0078  | 1.71 | metallothionein 1, nitric oxide mediated signal transduction |
| Timp3  | BI111620  | Mm.4871   | 1   | 5152 | 1027 | 9030  | 243 | 0.00047 | 1.75 | tissue inhibitor of metalloproteinase 3                      |
| Ccrn4l | AF199491  | Mm.86541  | 1   | 1294 | 391  | 2297  | 160 | 0.00231 | 1.77 | CCR4 carbon catabolite repression 4-like (S. cerevisiae)     |
| S100a8 | NM_013650 | Mm.21567  | 0.8 | 99   | 54   | 210   | 34  | 0.01241 | 2.12 | S100 calcium binding protein A8 (calgranulin A)              |
| Hba-a1 | NM_008218 | Mm.196110 | 1   | 1535 | 262  | 3693  | 641 | 0.03093 | 2.41 | hemoglobin alpha, adult chain 1                              |

#### UNKNOWN

| GeneSymbol | Genbank   | Unigene    | A/P | Ctl Mean | Ctl stdev | Exp Mean | Exp stdev | P-value | Fold Change | Gene Description                                                        |
|------------|-----------|------------|-----|----------|-----------|----------|-----------|---------|-------------|-------------------------------------------------------------------------|
| 1810057C19 | NM_026433 | Mm.212428  | 1   | 1509     | 384       | 351      | 205       | 0.00146 | -4.29       | RIKEN cDNA 1810057C19 gene                                              |
| 1200015N20 | CA772992  | Mm.19825   | 0.8 | 39       | 22        | 9        | 6         | 0.03658 | -4.21       | RIKEN cDNA 1200015N20 gene                                              |
| 2310043K02 | BC018204  | Mm.23916   | 1   | 1282     | 573       | 407      | 72        | 0.02807 | -3.15       | RIKEN cDNA 2310043K02 gene                                              |
| 5730454B08 | BI107105  | Mm.245357  | 1   | 703      | 229       | 239      | 206       | 0.03197 | -2.94       | RIKEN cDNA G630041M05 gene                                              |
| 1110012D08 | AV375008  | Mm.24630   | 0.6 | 85       | 27        | 30       | 25        | 0.03566 | -2.77       | RIKEN cDNA 1110012D08 gene                                              |
| NULL       | NULL      | NULL       | 1   | 913      | 250       | 331      | 284       | 0.04291 | -2.76       | null                                                                    |
| 4930572L20 | BC025069  | Mm.109183  | 0.7 | 591      | 279       | 220      | 14        | 0.04123 | -2.68       | RIKEN cDNA 4930572L20 gene                                              |
| 1700037B15 | AF335325  | Mm.250841  | 1   | 7758     | 1751      | 2924     | 263       | 0.00375 | -2.65       | RIKEN cDNA 1700037B15 gene                                              |
| NULL       | NULL      | NULL       | 1   | 966      | 197       | 370      | 159       | 0.00546 | -2.61       | null                                                                    |
| NULL       | AK020672  | NULL       | 0.8 | 470      | 76        | 189      | 30        | 0.00033 | -2.48       | null                                                                    |
| 2610507B11 | BI437883  | Mm.237103  | 1   | 836      | 333       | 341      | 214       | 0.04355 | -2.45       | null                                                                    |
| 9430063L05 | AI639670  | Mm.129840  | 1   | 2056     | 650       | 861      | 593       | 0.0449  | -2.39       | null                                                                    |
| 1700037B15 | AV251625  | Mm.250841  | 1   | 6135     | 2138      | 2561     | 323       | 0.02143 | -2.39       | RIKEN cDNA 1700037B15 gene                                              |
| B230354B21 | BG076162  | Mm.87487   | 0.8 | 163      | 25        | 69       | 43        | 0.04058 | -2.37       | RIKEN cDNA B230354B21 gene                                              |
| 0610007P08 | BI151889  | Mm.186610  | 0.5 | 349      | 158       | 156      | 39        | 0.04904 | -2.23       | RIKEN cDNA 0610007P08 gene                                              |
| A630053O10 | BE631962  | Mm.38878   | 0.5 | 349      | 134       | 158      | 45        | 0.03387 | -2.2        | hypothetical protein A630053O10                                         |
| NULL       | AK007618  | Mm.27450.2 | 1   | 1355     | 371       | 625      | 238       | 0.01485 | -2.17       | null                                                                    |
| A1850305   | BB534069  | Mm.203921  | 1   | 511      | 91        | 236      | 126       | 0.04603 | -2.16       | OTU domain, ubiquitin aldehyde binding 1                                |
| 1700027M01 | NM_023544 | Mm.17880   | 1   | 2410     | 239       | 1183     | 79        | 0.00013 | -2.04       | RIKEN cDNA 1700027M01 gene                                              |
| BC016495   | BC016495  | Mm.211595  | 1   | 198      | 77        | 98       | 36        | 0.04916 | -2.01       | cDNA sequence BC016495                                                  |
| 2310001H12 | BC012405  | Mm.45217   | 1   | 529      | 120       | 270      | 128       | 0.04753 | -1.96       | RIKEN cDNA 2310001H12 gene                                              |
| 2010011I20 | AK008190  | Mm.30013   | 0.8 | 896      | 261       | 460      | 137       | 0.0214  | -1.95       | RIKEN cDNA 2010011I20 gene                                              |
| C80913     | AV094811  | Mm.23997   | 1   | 1093     | 307       | 570      | 67        | 0.01459 | -1.92       | expressed sequence C80913                                               |
| A030012M09 | BB549335  | Mm.21539   | 1   | 840      | 222       | 437      | 167       | 0.03378 | -1.92       | RIKEN cDNA A030012M09 gene                                              |
| NULL       | BG297038  | NULL       | 1   | 2663     | 899       | 1394     | 534       | 0.04634 | -1.91       | null                                                                    |
| D11Ert603e | BC005646  | Mm.276504  | 1   | 242      | 49        | 127      | 48        | 0.03166 | -1.9        | DNA segment, Chr 11, ERATO Doi 603, expressed                           |
| 4933411K20 | BB825968  | Mm.133623  | 0.6 | 200      | 56        | 105      | 38        | 0.03081 | -1.9        | RIKEN cDNA 4933411K20 gene                                              |
| 9330160A12 | BB051441  | Mm.38851   | 0.8 | 232      | 49        | 124      | 44        | 0.02412 | -1.88       | null                                                                    |
| NULL       | AW556821  | Mm.254283  | 1   | 483      | 139       | 259      | 72        | 0.0249  | -1.86       | (M.musculus) I58401 protein-tyrosine kinase (EC 2.7.1.112) JAK3 - mouse |
| 1700016A15 | AV230748  | Mm.5364    | 0.5 | 115      | 12        | 63       | 19        | 0.02449 | -1.84       | product: hypothetical G-protein beta WD-40 repeats containing protein   |
| LOC213233  | BC017613  | Mm.296902  | 0.6 | 256      | 56        | 141      | 10        | 0.01123 | -1.81       | similar to hypothetical protein FLJ10143                                |
| NULL       | AK004608  | Mm.197551  | 0.8 | 250      | 83        | 140      | 26        | 0.04149 | -1.79       | null                                                                    |
| 1300010A20 | BI440178  | Mm.225289  | 1   | 180      | 29        | 100      | 3         | 0.00387 | -1.79       | RIKEN cDNA 1300010A20 gene                                              |
| 8430423A01 | AW048468  | Mm.116767  | 0.8 | 292      | 44        | 163      | 32        | 0.00343 | -1.79       | RIKEN cDNA 8430423A01 gene                                              |
| C330021A05 | BB303415  | Mm.271656  | 1   | 625      | 127       | 350      | 89        | 0.01205 | -1.78       | null                                                                    |
| 5730438N18 | BC011293  | Mm.41877   | 1   | 1311     | 94        | 741      | 97        | 0.00126 | -1.77       | RIKEN cDNA 5730438N18 gene                                              |
| 2210418I02 | NM_022995 | Mm.73682   | 1   | 817      | 231       | 469      | 88        | 0.02339 | -1.74       | RIKEN cDNA 2210418I02 gene                                              |
| 2510005D08 | NM_026526 | Mm.45225   | 1   | 745      | 111       | 428      | 98        | 0.00839 | -1.74       | RIKEN cDNA 2510005D08 gene                                              |
| BC005682   | NM_033562 | Mm.28131   | 1   | 1290     | 264       | 747      | 80        | 0.00789 | -1.73       | cDNA sequence BC005682                                                  |
| NULL       | AK006072  | Mm.3990.2  | 1   | 436      | 83        | 251      | 49        | 0.00789 | -1.73       | null                                                                    |
| 4930504E06 | AI639566  | Mm.290947  | 1   | 2967     | 665       | 1724     | 167       | 0.01061 | -1.72       | null                                                                    |
| 0610010K06 | AK002489  | Mm.294813  | 1   | 410      | 98        | 242      | 17        | 0.02037 | -1.7        | null                                                                    |
| BC027342   | BC027342  | Mm.29046   | 1   | 1755     | 197       | 1045     | 219       | 0.01007 | -1.68       | cDNA sequence BC027342                                                  |
| 2700075B01 | BC026452  | Mm.108596  | 1   | 434      | 83        | 259      | 62        | 0.01963 | -1.68       | RIKEN cDNA 2700075B01 gene                                              |
| 1110018M03 | BC027250  | Mm.291809  | 1   | 1964     | 599       | 1175     | 122       | 0.0362  | -1.67       | RIKEN cDNA 1110018M03 gene                                              |
| 1810008K03 | BC025169  | Mm.35083   | 1   | 6719     | 1135      | 4013     | 1119      | 0.03015 | -1.67       | RIKEN cDNA 1810008K03 gene                                              |
| NULL       | BI454991  | Mm.335678  | 1   | 755      | 163       | 453      | 35        | 0.01072 | -1.66       | null                                                                    |
| AW742319   | BG075943  | Mm.21092   | 1   | 2379     | 710       | 1439     | 254       | 0.04354 | -1.65       | null                                                                    |
| 9530098M12 | AI875447  | Mm.207367  | 0.6 | 416      | 106       | 251      | 50        | 0.02615 | -1.65       | null                                                                    |
| NULL       | AA223007  | NULL       | 1   | 170      | 36        | 104      | 31        | 0.0437  | -1.63       | null                                                                    |
| A1643885   | BB409881  | Mm.46749   | 1   | 563      | 120       | 345      | 57        | 0.01371 | -1.63       | expressed sequence AI643885                                             |
| 2310008M20 | NM_025512 | Mm.25674   | 1   | 216      | 51        | 133      | 35        | 0.03624 | -1.62       | RIKEN cDNA 2310008M20 gene                                              |
| 1110001A05 | NM_019808 | Mm.117709  | 1   | 322      | 69        | 198      | 61        | 0.04715 | -1.62       | RIKEN cDNA 1110001A05 gene                                              |
| 1110018O08 | AK010881  | Mm.29432   | 1   | 372      | 67        | 232      | 61        | 0.03008 | -1.6        | RIKEN cDNA 1110018O08 gene                                              |
| 5830411E10 | AK015312  | Mm.196290  | 1   | 229      | 25        | 143      | 35        | 0.03375 | -1.6        | null                                                                    |
| 2310044D20 | BB667295  | Mm.272705  | 1   | 116      | 31        | 73       | 11        | 0.04154 | -1.59       | RIKEN cDNA 2310044D20 gene                                              |

|              |           |            |     |      |      |       |      |         |       |                                                                          |
|--------------|-----------|------------|-----|------|------|-------|------|---------|-------|--------------------------------------------------------------------------|
| AI415282     | NM_134021 | Mm.254704  | 1   | 1425 | 395  | 901   | 100  | 0.03713 | -1.58 | expressed sequence AI415282                                              |
| NULL         | AK009814  | Mm.28566.2 | 1   | 895  | 127  | 566   | 136  | 0.02756 | -1.58 | null                                                                     |
| 2610507L03I  | BY239594  | Mm.133263  | 1   | 348  | 68   | 220   | 42   | 0.01726 | -1.58 | RIKEN cDNA 2610507L03 gene                                               |
| 0610009D07   | NM_025323 | Mm.29712   | 1   | 1302 | 314  | 830   | 50   | 0.03026 | -1.57 | RIKEN cDNA 0610009D07 gene                                               |
| A530057M15   | AV307219  | Mm.29098   | 1   | 2100 | 452  | 1344  | 107  | 0.01601 | -1.56 | RIKEN cDNA A530057M15 gene                                               |
| G630024C07   | BB823641  | Mm.41038   | 1   | 663  | 63   | 424   | 73   | 0.00952 | -1.56 | null                                                                     |
| NULL         | AK004647  | Mm.27697.2 | 1   | 382  | 64   | 245   | 19   | 0.00676 | -1.56 | null                                                                     |
| 1110023P21I  | NM_025390 | Mm.22284   | 1   | 537  | 76   | 347   | 57   | 0.01046 | -1.55 | RIKEN cDNA 1110023P21 gene                                               |
| BC013667     | BC013667  | Mm.220901  | 1   | 652  | 85   | 424   | 44   | 0.00265 | -1.54 | null                                                                     |
| 4631422C05   | BI648645  | Mm.200423  | 1   | 3137 | 573  | 2057  | 271  | 0.01139 | -1.53 | RIKEN cDNA 4631422C05 gene                                               |
| 4432406C05   | AK009236  | Mm.10068   | 0.8 | 325  | 20   | 213   | 32   | 0.01275 | -1.52 | RIKEN cDNA 4432406C05 gene                                               |
| 2610034N03   | BC016576  | Mm.182574  | 1   | 580  | 73   | 385   | 24   | 0.00282 | -1.51 | RIKEN cDNA 2610034N03 gene                                               |
| 4930504E06I  | BM118729  | Mm.290947  | 1   | 745  | 129  | 492   | 49   | 0.00773 | -1.51 | null                                                                     |
| NULL         | BB010153  | Mm.46412   | 1   | 2448 | 403  | 1618  | 62   | 0.01074 | -1.51 | null                                                                     |
| 6430628I05F  | CA576920  | Mm.196533  | 1   | 2404 | 313  | 3617  | 128  | 0.00026 | 1.5   | RIKEN cDNA 6430628I05 gene                                               |
| 1190005B03   | BC016073  | Mm.212227  | 1   | 1273 | 70   | 1921  | 233  | 0.04273 | 1.51  | RIKEN cDNA 1190005B03 gene                                               |
| 2810405K02   | AI836168  | Mm.41868   | 1   | 5748 | 435  | 8652  | 990  | 0.04063 | 1.51  | RIKEN cDNA 2810405K02 gene                                               |
| 4933408N02   | BC005737  | Mm.294082  | 1   | 318  | 21   | 480   | 20   | 0.00012 | 1.51  | RIKEN cDNA 4933408N02 gene                                               |
| 1700085D07   | AW123286  | Mm.234912  | 1   | 7319 | 1418 | 11027 | 688  | 0.00258 | 1.51  | Mus musculus similar to plectin (LOC381012), mRNA                        |
| NULL         | AA419994  | Mm.34106   | 1   | 1723 | 563  | 2608  | 85   | 0.02607 | 1.51  | ESTs, Highly similar to 2118318A promyelocyte leukemia Zn finger protein |
| BC003332     | BB278670  | Mm.100116  | 1   | 1456 | 458  | 2214  | 256  | 0.0242  | 1.52  | cDNA sequence BC003332                                                   |
| 2210010N04   | BB759101  | Mm.196541  | 0.7 | 1167 | 204  | 1774  | 51   | 0.00147 | 1.52  | RIKEN cDNA 2210010N04 gene                                               |
| 2310066E14I  | BC006820  | Mm.41261   | 1   | 651  | 149  | 987   | 57   | 0.00413 | 1.52  | RIKEN cDNA 2310066E14 gene                                               |
| 2310047C17   | BC028439  | Mm.35669   | 1   | 275  | 62   | 418   | 56   | 0.02138 | 1.52  | RIKEN cDNA 2310047C17 gene                                               |
| 1110035L05I  | NM_026125 | Mm.29140   | 1   | 1434 | 330  | 2214  | 258  | 0.01379 | 1.54  | RIKEN cDNA 1110035L05 gene                                               |
| 6330581L23I  | BG068796  | Mm.224766  | 1   | 228  | 79   | 355   | 26   | 0.02228 | 1.55  | RIKEN cDNA 6330581L23 gene                                               |
| 4121402D02   | AK014463  | Mm.258352  | 1   | 576  | 172  | 892   | 77   | 0.01206 | 1.55  | RIKEN cDNA 4121402D02 gene                                               |
| NULL         | AI467657  | Mm.34106   | 1   | 3268 | 969  | 5076  | 153  | 0.01506 | 1.55  | ESTs, Highly similar to 2118318A promyelocyte leukemia Zn finger protein |
| 4933424M23   | AK016901  | Mm.28864   | 1   | 513  | 109  | 799   | 37   | 0.00305 | 1.56  | null                                                                     |
| AW547365     | BC025941  | Mm.270088  | 1   | 1266 | 330  | 1974  | 195  | 0.00889 | 1.56  | expressed sequence AW547365                                              |
| 2510048K03   | AK011112  | Mm.39856   | 0.7 | 336  | 86   | 528   | 77   | 0.02239 | 1.57  | RIKEN cDNA 2510048K03 gene                                               |
| NULL         | AV326938  | Mm.258250  | 1   | 614  | 107  | 968   | 59   | 0.00097 | 1.57  | RIKEN cDNA 2810425F24 gene                                               |
| 6-Sep        | BG920446  | Mm.260036  | 1   | 58   | 18   | 92    | 17   | 0.04641 | 1.57  | null, Mam6 Mus musculus cDNA clone IMAGE:4953849 5', mRNA sequence       |
| 2310045A20   | BC026655  | Mm.235020  | 1   | 1082 | 287  | 1711  | 117  | 0.00495 | 1.58  | RIKEN cDNA 2310045A20 gene                                               |
| 1110035O14   | AW989410  | Mm.202727  | 1   | 561  | 204  | 890   | 138  | 0.03492 | 1.59  | null                                                                     |
| 1110020B03   | AK003844  | Mm.253151  | 0.8 | 129  | 35   | 205   | 33   | 0.02794 | 1.59  | null                                                                     |
| NULL         | BM117074  | Mm.259655  | 1   | 1031 | 106  | 1649  | 161  | 0.00972 | 1.6   | null                                                                     |
| 2600017P15I  | BM200255  | Mm.260997  | 1   | 384  | 130  | 617   | 66   | 0.01551 | 1.61  | RIKEN cDNA 2600017P15 gene                                               |
| NULL         | BE686667  | Mm.336431  | 1   | 518  | 224  | 835   | 74   | 0.03356 | 1.61  | ESTs                                                                     |
| NULL         | BG868949  | Mm.259260  | 1   | 480  | 173  | 780   | 94   | 0.01942 | 1.62  | Mus musculus 10, 11 days embryo whole body cDNA, clone:2810410A03        |
| NULL         | W45978    | Mm.178550  | 1   | 3521 | 832  | 5720  | 155  | 0.00456 | 1.62  | Mus musculus, clone IMAGE:4206343, mRNA                                  |
| 2310022A10   | AK009941  | Mm.29831   | 1   | 966  | 153  | 1575  | 296  | 0.04575 | 1.63  | null                                                                     |
| NULL         | AI845177  | Mm.181435  | 1   | 4515 | 1759 | 7351  | 1132 | 0.03235 | 1.63  | ESTs                                                                     |
| 1110006I15F  | NM_134142 | Mm.251890  | 1   | 5674 | 2313 | 9447  | 1138 | 0.02172 | 1.66  | RIKEN cDNA 1110006I15 gene                                               |
| LOC227619    | BM120583  | Mm.139243  | 1   | 198  | 78   | 328   | 36   | 0.01932 | 1.66  | hypothetical protein LOC227619                                           |
| D14Erttd226e | BC025568  | Mm.28876   | 0.5 | 622  | 205  | 1039  | 120  | 0.01114 | 1.67  | DNA segment, Chr 14, ERATO Doi 226, expressed                            |
| 1810058I24F  | BE627374  | Mm.302622  | 1   | 2742 | 537  | 4582  | 256  | 0.00062 | 1.67  | Mus musculus transcribed sequence                                        |
| MGC25248     | NM_008419 | Mm.1241    | 1   | 808  | 47   | 1365  | 143  | 0.02269 | 1.69  | hypothetical protein MGC25248                                            |
| NULL         | BM207314  | Mm.322432  | 1   | 534  | 107  | 910   | 79   | 0.00132 | 1.7   | null                                                                     |
| B930093C12   | AI507196  | Mm.39296   | 1   | 1927 | 786  | 3282  | 505  | 0.02515 | 1.7   | RIKEN cDNA B930093C12 gene                                               |
| 1110061L23I  | AK016797  | Mm.181689  | 1   | 594  | 112  | 1028  | 134  | 0.00935 | 1.73  | null                                                                     |
| 0610013D04   | NM_030697 | Mm.196330  | 1   | 814  | 193  | 1433  | 292  | 0.04708 | 1.76  | RIKEN cDNA 0610013D04 gene                                               |
| NULL         | AK017541  | NULL       | 1   | 466  | 125  | 826   | 77   | 0.0024  | 1.77  | null                                                                     |
| NULL         | AV013785  | Mm.208618  | 0.7 | 188  | 101  | 337   | 16   | 0.03242 | 1.79  | Mus musculus, clone IMAGE:5028242, mRNA                                  |
| 2310047C17   | BC028439  | Mm.35669   | 1   | 369  | 83   | 660   | 40   | 0.00056 | 1.79  | RIKEN cDNA 2310047C17 gene                                               |
| 1810013P09I  | BC002120  | Mm.30886   | 1   | 1888 | 201  | 3390  | 117  | 0.00001 | 1.8   | RIKEN cDNA 1810013P09 gene                                               |
| 1500005K14   | BG070087  | Mm.34131   | 1   | 697  | 331  | 1253  | 246  | 0.04273 | 1.8   | RIKEN cDNA 1500005K14 gene                                               |
| 1190002H23   | NM_025427 | Mm.29811   | 1   | 3351 | 852  | 6100  | 729  | 0.00472 | 1.82  | RIKEN cDNA 1190002H23 gene                                               |
| 2700038N03   | NM_027356 | Mm.124666  | 1   | 638  | 184  | 1168  | 88   | 0.00157 | 1.83  | RIKEN cDNA 2700038N03 gene                                               |
| 2410003C09   | BC017528  | Mm.251199  | 1   | 336  | 76   | 616   | 11   | 0.00129 | 1.83  | RIKEN cDNA 2410003C09 gene                                               |
| 2310047C17   | AK009866  | Mm.35669   | 1   | 461  | 90   | 843   | 20   | 0.00027 | 1.83  | null                                                                     |
| 1110033A15   | AW556696  | Mm.332097  | 1   | 3663 | 1128 | 6705  | 670  | 0.00306 | 1.83  | Mus musculus transcribed sequences                                       |
| C730024G01   | BE653749  | Mm.209730  | 1   | 312  | 86   | 583   | 67   | 0.00439 | 1.86  | RIKEN cDNA C730024G01 gene                                               |
| 1810073P09I  | BB278286  | Mm.202157  | 0.5 | 141  | 20   | 264   | 6    | 0.00006 | 1.87  | RIKEN cDNA 1810073P09 gene                                               |
| 2610042L04I  | BM195235  | Mm.326705  | 1   | 185  | 62   | 356   | 41   | 0.00346 | 1.93  | Mus musculus transcribed seq with sim to protein enhancer of polycomb 1  |
| 1190002H23   | BY008248  | Mm.29811   | 1   | 3638 | 1023 | 7107  | 278  | 0.00083 | 1.95  | RIKEN cDNA 1190002H23 gene                                               |
| D5Erttd593e  | BB667844  | Mm.21965   | 1   | 873  | 65   | 1722  | 315  | 0.04419 | 1.97  | DNA segment, Chr 5, ERATO Doi 593, expressed                             |

|                     |           |           |     |      |      |      |         |      |                                                                   |
|---------------------|-----------|-----------|-----|------|------|------|---------|------|-------------------------------------------------------------------|
| 2810432L12 BC013800 | Mm.24564  | 1         | 917 | 232  | 1815 | 224  | 0.00562 | 1.98 | RIKEN cDNA 2810432L12 gene                                        |
| BC043118            | AV276428  | Mm.246424 | 1   | 565  | 109  | 1123 | 0.01035 | 1.99 | cDNA sequence BC043118                                            |
| AI255170            | BE134496  | Mm.214973 | 1   | 404  | 212  | 810  | 0.03735 | 2    | expressed sequence AI255170                                       |
| NULL                | AA266723  | Mm.29940  | 0.5 | 178  | 41   | 366  | 0.03417 | 2.05 | Mus musculus transcribed sequences                                |
| C430015I23f         | BC021326  | Mm.186994 | 1   | 105  | 31   | 227  | 0.00207 | 2.16 | RIKEN cDNA C430015I23 gene                                        |
| NULL                | BG063148  | Mm.27585  | 1   | 236  | 108  | 511  | 0.01571 | 2.17 | ESTs, Weakly similar to tuftelin 1 [Mus musculus]                 |
| 6530401D17          | AK013740  | Mm.27579  | 1   | 219  | 129  | 505  | 0.04469 | 2.3  | RIKEN cDNA 6530401D17 gene                                        |
| NULL                | BE865094  | Mm.31961  | 0.7 | 92   | 50   | 216  | 0.00446 | 2.34 | Mus musculus, Similar to RIKEN cDNA 1200004E24 gene               |
| NULL                | NM_133914 | NULL      | 1   | 317  | 85   | 761  | 0.00074 | 2.39 | null                                                              |
| 3110038L01f         | NM_026524 | Mm.29429  | 1   | 2049 | 423  | 5194 | 0.00008 | 2.53 | RIKEN cDNA 3110038L01 gene                                        |
| NULL                | AI467657  | Mm.34106  | 1   | 1149 | 456  | 2973 | 0.00053 | 2.59 | ESTs, similar to 2118318A promyelocyte leukemia Zn finger protein |

SUPPLEMENTAL TABLE 3

Changes in gene expression in the anterior tibialis of MGSKO mice as compared with wild-type littermates. See legend to Supplemental Table 1. Exp, MGSKO samples.

**CARBOHYDRATE METABOLISM**

| GeneSymbol | Genbank  | Unigene   | A/P | Ctl Mean | Ctl stdev | Exp Mean | Exp stdev | P-value | Fold Change | Gene Description                                                    |
|------------|----------|-----------|-----|----------|-----------|----------|-----------|---------|-------------|---------------------------------------------------------------------|
| Gys1/Gys3  | Mm.35662 | NM_008195 | 1   | 9271     | 772       | 50       | 18        | 0.00016 | -185.43     | glycogen synthase 1                                                 |
| Gys1/Gys3  | Mm.18524 | NM_030678 | 1   | 2404     | 1062      | 23       | 10        | 0.02072 | -102.65     | glycogen synthase 1                                                 |
| Ppp1r1a    | Mm.14378 | NM_021391 | 1   | 1805     | 122       | 181      | 70        | 0       | -9.98       | protein phosphatase 1, regulatory (inhibitor) subunit 1A            |
| Slc2a3     | Mm.3726  | BB414515  | 1   | 582      | 134       | 172      | 84        | 0.00357 | -3.38       | solute carrier family 2 (facilitated glucose transporter), member 3 |
| Slc2a3     | Mm.3726  | BB414515  | 1   | 765      | 76        | 248      | 20        | 0.00095 | -3.08       | solute carrier family 2 (facilitated glucose transporter), member 3 |
| Slc2a1     | Mm.21002 | BM207588  | 1   | 722      | 150       | 379      | 75        | 0.01516 | -1.91       | solute carrier family 2 (facilitated glucose transporter), member 1 |
| Mod1       | Mm.14815 | NM_008615 | 1   | 5627     | 1202      | 3026     | 303       | 0.02468 | -1.86       | malic enzyme                                                        |
| Aldh6a1    | Mm.18270 | NM_134042 | 1   | 3207     | 724       | 1901     | 50        | 0.03681 | -1.69       | aldehyde dehydrogenase family 6, subfamily A1                       |
| Sdh1       | Mm.10492 | BI143942  | 1   | 3219     | 508       | 1926     | 236       | 0.00997 | -1.67       | sorbitol dehydrogenase 1                                            |
| Sdh1       | Mm.10492 | AV253518  | 1   | 951      | 164       | 615      | 114       | 0.02021 | -1.55       | sorbitol dehydrogenase 1                                            |
| Ids        | Mm.23308 | BB493523  | 1   | 164      | 41        | 248      | 49        | 0.04063 | 1.51        | iduronate 2-sulfatase                                               |
| Pdhh       | Mm.22676 | BC019512  | 1   | 14776    | 650       | 22562    | 1264      | 0.00039 | 1.53        | pyruvate dehydrogenase (lipoamide) beta                             |
| Dbr1       | Mm.31324 | BC006661  | 1   | 206      | 34        | 324      | 67        | 0.03617 | 1.57        | debranching enzyme ( <i>S. Cerevisiae</i> ) homolog 1               |
| Ugp2       | Mm.28877 | AV370025  | 1   | 9724     | 1862      | 16403    | 354       | 0.00588 | 1.69        | UDP-glucose pyrophosphorylase 2                                     |
| Ugp2       | Mm.28877 | AV370025  | 1   | 6733     | 1398      | 12568    | 536       | 0.00147 | 1.87        | UDP-glucose pyrophosphorylase 2                                     |
| Man2b1     | Mm.4219  | BC005430  | 1   | 916      | 451       | 1743     | 462       | 0.04291 | 1.9         | mannosidase 2, alpha B1                                             |
| Gbe1       | Mm.29201 | NM_028803 | 1   | 1399     | 69        | 3163     | 149       | 0.00003 | 2.26        | glucan (1,4-alpha-), branching enzyme 1                             |

**AMINO ACID METABOLISM**

| GeneSymbol | Genbank  | Unigene   | A/P | Ctl Mean | Ctl stdev | Exp Mean | Exp stdev | P-value | Fold Change | Gene Description                                           |
|------------|----------|-----------|-----|----------|-----------|----------|-----------|---------|-------------|------------------------------------------------------------|
| Odc        | Mm.34102 | BB519474  | 1   | 3399     | 323       | 1519     | 95        | 0.00037 | -2.24       | ornithine decarboxylase, structural                        |
| Bckdhh     | Mm.12819 | AW047304  | 1   | 1638     | 197       | 730      | 115       | 0.00051 | -2.24       | branched chain ketoacid dehydrogenase E1, beta polypeptide |
| Odc        | Mm.34102 | C81193    | 1   | 4209     | 894       | 2023     | 375       | 0.01075 | -2.08       | ornithine decarboxylase, structural                        |
| Odc        | Mm.34102 | S64539    | 1   | 1693     | 325       | 845      | 185       | 0.00627 | -2          | ornithine decarboxylase, structural                        |
| Gpx3       | Mm.7156  | NM_008161 | 1   | 11129    | 1177      | 5715     | 381       | 0.00094 | -1.95       | glutathione peroxidase 3                                   |
| Mgst1      | Mm.14796 | BC009155  | 1   | 8500     | 1040      | 4575     | 611       | 0.00128 | -1.86       | microsomal glutathione S-transferase 1                     |
| Gstm2      | Mm.14601 | NM_008183 | 1   | 2364     | 156       | 1301     | 102       | 0.00009 | -1.82       | glutathione S-transferase, mu 2                            |
| Ivd        | Mm.6635  | AV221988  | 1   | 1491     | 221       | 828      | 167       | 0.00307 | -1.8        | isovaleryl coenzyme A dehydrogenase                        |
| Amd1       | Mm.7880  | NM_009665 | 1   | 18456    | 3073      | 10325    | 1237      | 0.008   | -1.79       | S-adenosylmethionine decarboxylase 1                       |
| Glul       | Mm.2338  | AI391218  | 1   | 3916     | 776       | 2242     | 72        | 0.02323 | -1.75       | glutamate-ammonia ligase (glutamine synthase)              |
| Pcca       | Mm.23876 | AY046947  | 1   | 3591     | 249       | 2187     | 161       | 0.00022 | -1.64       | propionyl-Coenzyme A carboxylase, alpha polypeptide        |
| Sms        | Mm.18652 | NM_009214 | 1   | 2792     | 351       | 1776     | 434       | 0.01087 | -1.57       | spermine synthase                                          |
| Ddt        | Mm.5731  | NM_010027 | 1   | 1330     | 130       | 870      | 98        | 0.00132 | -1.53       | D-dopachrome tautomerase                                   |
| Glul       | Mm.2338  | U09114    | 1   | 2077     | 152       | 1384     | 244       | 0.00483 | -1.5        | glutamate-ammonia ligase (glutamine synthase)              |
| Gstm1      | Mm.2011  | NM_010358 | 1   | 7010     | 1043      | 4660     | 199       | 0.02148 | -1.5        | glutathione S-transferase, mu 1                            |
| Dbt        | Mm.3636  | NM_010022 | 1   | 788      | 139       | 524      | 49        | 0.02359 | -1.5        | dihydrolipoamide branched chain transacylase E2            |
| Aox1       | Mm.26787 | NM_009676 | 1   | 889      | 138       | 1396     | 101       | 0.00105 | 1.57        | aldehyde oxidase 1                                         |

**LIPID METABOLISM**

| GeneSymbol | Genbank   | Unigene   | A/P | Ctl Mean | Ctl stdev | Exp Mean | Exp stdev | P-value | Fold Change | Gene Description                                       |
|------------|-----------|-----------|-----|----------|-----------|----------|-----------|---------|-------------|--------------------------------------------------------|
| Acad5b     | Mm.28430  | BF228057  | 1   | 1849     | 159       | 767      | 50        | 0.00021 | -2.41       | acyl-Coenzyme A dehydrogenase, short/branched chain    |
| Siat9      | Mm.38248  | BB829192  | 1   | 2361     | 377       | 1113     | 700       | 0.02576 | -2.12       | CMP-NeuAc:lactosylceramide alpha-2,3-sialyltransferase |
| Pla2g7     | Mm.9277.2 | AK005158  | 1   | 2081     | 241       | 1049     | 130       | 0.00066 | -1.98       | phospholipase A2, group VII                            |
| Pla2g7     | Mm.9277.2 | AK005158  | 1   | 2081     | 241       | 1049     | 130       | 0.00066 | -1.98       | phospholipase A2, group VII                            |
| Cbr2       | Mm.21454  | BC010758  | 1   | 1795     | 371       | 953      | 258       | 0.01371 | -1.88       | carbonyl reductase 2                                   |
| Pip5k1b    | Mm.87521  | BB822856  | 1   | 960      | 139       | 548      | 143       | 0.00621 | -1.75       | phosphatidylinositol-4-phosphate 5-kinase, type 1 beta |
| Siat9      | Mm.38248  | NM_011375 | 1   | 2188     | 124       | 1287     | 206       | 0.00068 | -1.7        | CMP-NeuAc:lactosylceramide alpha-2,3-sialyltransferase |
| Cyp27a1    | Mm.26793  | NM_024264 | 1   | 3973     | 212       | 2337     | 260       | 0.00007 | -1.7        | cytochrome P450, family 27, subfamily a, polypeptide 1 |
| Acads      | Mm.18759  | NM_007383 | 1   | 2566     | 83        | 1617     | 357       | 0.01402 | -1.59       | acyl-Coenzyme A dehydrogenase, short chain             |
| Acly       | Mm.25316  | AF332052  | 1   | 474      | 116       | 744      | 139       | 0.02521 | 1.57        | ATP citrate lyase                                      |
| Siat8d     | Mm.10701  | NM_009183 | 1   | 511      | 144       | 865      | 211       | 0.03962 | 1.69        | sialyltransferase 8 (alpha-2, 8-sialyltransferase) D   |
| Ppap2a     | Mm.2598   | NM_008903 | 1   | 2772     | 63        | 4695     | 448       | 0.00343 | 1.69        | phosphatidic acid phosphatase 2a (Ppap2a), mRNA        |
| Ppap2a     | Mm.2598   | NM_008903 | 1   | 3845     | 612       | 6657     | 965       | 0.0044  | 1.73        | phosphatidic acid phosphatase 2a (Ppap2a), mRNA        |
| Synj2      | Mm.30717  | AF041858  | 1   | 753      | 55        | 1356     | 172       | 0.00263 | 1.8         | synaptojanin 2                                         |
| Synj2      | Mm.30717  | BE944213  | 1   | 505      | 30        | 1001     | 208       | 0.01812 | 1.98        | synaptojanin 2                                         |
| Ache       | Mm.3142   | NM_009599 | 1   | 909      | 219       | 2202     | 167       | 0.00008 | 2.42        | acetylcholinesterase                                   |
| Plcb4      | Mm.13209  | AF332072  | 1   | 88       | 61        | 302      | 122       | 0.03542 | 3.41        | phospholipase C, beta 4                                |



### MISCELLANIOUS METABOLISM

| GeneSymbol | Genbank   | Unigene   | A/P | Ctl Mean | Ctl stdev | Exp Mean | Exp stdev | P-value | Fold Change | Gene Description                             |
|------------|-----------|-----------|-----|----------|-----------|----------|-----------|---------|-------------|----------------------------------------------|
| Dcxr       | Mm.29180  | BC012247  | 1   | 549      | 123       | 144      | 45        | 0.00358 | -3.81       | dicarbonyl L-xylulose reductase              |
| Ces3       | Mm.12080  | A1315015  | 1   | 701      | 179       | 372      | 136       | 0.02683 | -1.88       | carboxylesterase 3                           |
| Ces3       | Mm.12080  | NM_053200 | 1   | 1341     | 324       | 820      | 129       | 0.04068 | -1.63       | carboxylesterase 3                           |
| Suox       | Mm.23352  | BC027197  | 1   | 1755     | 308       | 1107     | 134       | 0.01823 | -1.59       | sulfite oxidase                              |
| Impdh2     | Mm.6065   | M33934    | 1   | 2678     | 508       | 1774     | 90        | 0.0395  | -1.51       | inosine 5'-phosphate dehydrogenase 2         |
| Car14      | Mm.22483  | NM_011797 | 1   | 1637     | 453       | 2524     | 417       | 0.02815 | 1.54        | carbonic anhydrase 14                        |
| Gch        | Mm.10651  | BB698398  | 1   | 181      | 26        | 289      | 67        | 0.04012 | 1.6         | GTP cyclohydrolase 1                         |
| Pde7a      | Mm.5034   | NM_008802 | 1   | 2029     | 569       | 3388     | 561       | 0.01454 | 1.67        | phosphodiesterase 7A                         |
| Chuk       | Mm.3996.2 | BC018243  | 1   | 273      | 60        | 468      | 52        | 0.00291 | 1.71        | conserved helix-loop-helix ubiquitous kinase |
| Pde7a      | Mm.5034   | NM_008802 | 1   | 1079     | 180       | 1914     | 435       | 0.02391 | 1.77        | phosphodiesterase 7A                         |
| Pctk3      | Mm.28130  | NM_008795 | 1   | 319      | 109       | 579      | 130       | 0.023   | 1.81        | PCTAIRE-motif protein kinase 3               |
| Egln3      | Mm.33484  | NM_028133 | 1   | 1005     | 429       | 2213     | 145       | 0.00598 | 2.2         | EGL nine homolog 3 (C. elegans)              |
| Fabp4      | Mm.582.2  | BC002148  | 1   | 634      | 152       | 1467     | 110       | 0.00031 | 2.31        | fatty acid binding protein 4                 |
| Egln3      | Mm.33484  | BB284358  | 1   | 1160     | 96        | 2693     | 209       | 0.00019 | 2.32        | EGL nine homolog 3 (C. elegans)              |

### MUSCLE

| GeneSymbol    | Genbank   | Unigene   | A/P | Ctl Mean | Ctl stdev | Exp Mean | Exp stdev | P-value | Fold Change | Gene Description                                                 |
|---------------|-----------|-----------|-----|----------|-----------|----------|-----------|---------|-------------|------------------------------------------------------------------|
| Midori-pendii | Mm.25139  | NM_054085 | 1   | 7360     | 1300      | 3499     | 725       | 0.00351 | -2.1        | Midori-pending myocyte induction differentiation originator      |
| Edil3         | Mm.41716  | BB377340  | 1   | 93       | 10        | 56       | 13        | 0.00557 | -1.65       | EGF-like repeats and discordin I-like domains 3, integrin ligand |
| Myla          | Mm.43     | NM_010858 | 1   | 805      | 108       | 509      | 48        | 0.00752 | -1.58       | myosin light chain, alkali, cardiac atria                        |
| Dmd           | Mm.742    | BB085328  | 1   | 1130     | 335       | 1737     | 292       | 0.03424 | 1.54        | dystrophin, muscular dystrophy                                   |
| Itga7         | Mm.17974  | NM_008398 | 1   | 1259     | 249       | 1968     | 98        | 0.00613 | 1.56        | integrin alpha 7                                                 |
| Synpo2        | Mm.21234  | NM_080451 | 1   | 8363     | 2806      | 13151    | 1817      | 0.03527 | 1.57        | synaptopodin 2                                                   |
| Pln           | Mm.34145  | AV005660  | 1   | 427      | 113       | 740      | 63        | 0.00482 | 1.73        | phospholamban                                                    |
| Myo1b         | Mm.3390   | A1255256  | 1   | 370      | 106       | 644      | 135       | 0.01896 | 1.74        | myosin IB                                                        |
| Myo1b         | Mm.3390   | BI080370  | 1   | 426      | 104       | 812      | 147       | 0.00786 | 1.91        | myosin IB                                                        |
| Actc1         | Mm.686    | NM_009608 | 1   | 6406     | 1508      | 14183    | 4200      | 0.02524 | 2.21        | actin, alpha, cardiac                                            |
| Mybph         | Mm.20023  | NM_016749 | 1   | 1099     | 758       | 2908     | 988       | 0.02722 | 2.65        | myosin binding protein H, structural constituent of muscle       |
| Mylic         | Mm.19767  | X67685    | 1   | 8536     | 2982      | 32994    | 2670      | 0.00002 | 3.87        | ventricular alkali myosin light chain, skeletal, slow            |
| Mylic         | Mm.7353.2 | AK002312  | 1   | 5757     | 2108      | 27155    | 2292      | 0.00001 | 4.72        | myosin light chain, alkali, cardiac ventricles                   |
| Mylic         | Mm.19767  | X67685    | 1   | 2745     | 1082      | 14813    | 2549      | 0.00096 | 5.4         | ventricular alkali myosin light chain                            |

### WNT PATHWAY

| GeneSymbol | Genbank  | Unigene   | A/P | Ctl Mean | Ctl stdev | Exp Mean | Exp stdev | P-value | Fold Change | Gene Description                                      |
|------------|----------|-----------|-----|----------|-----------|----------|-----------|---------|-------------|-------------------------------------------------------|
| Wnt4       | Mm.20355 | NM_009523 | 1   | 1030     | 133       | 182      | 99        | 0.00005 | -5.64       | wingless-related MMTV integration site 4              |
| Wif1       | Mm.32831 | BC004048  | 1   | 109      | 41        | 24       | 14        | 0.019   | -4.42       | Wnt inhibitory factor 1                               |
| Dkk3       | Mm.55143 | AK004853  | 1   | 721      | 184       | 164      | 38        | 0.00971 | -4.38       | dickkopf homolog 3 (Xenopus laevis)                   |
| Tnfrsf19   | Mm.21526 | NM_013869 | 1   | 1317     | 263       | 503      | 85        | 0.00418 | -2.62       | tumor necrosis factor receptor superfamily, member 19 |
| Frzb       | Mm.3246  | NM_011356 | 1   | 681      | 79        | 378      | 71        | 0.00129 | -1.8        | frizzled-related protein wnt inhibitor                |
| Tcf1       | Mm.13391 | NM_009336 | 1   | 2999     | 610       | 1850     | 203       | 0.02338 | -1.62       | transcription factor-like 1                           |
| Ccnd2      | Mm.3141  | BM118679  | 1   | 299      | 55        | 187      | 41        | 0.01813 | -1.6        | cyclin D2 (target of wnt pathway)                     |
| Smo        | Mm.29279 | AW555326  | 1   | 319      | 96        | 536      | 77        | 0.0128  | 1.68        | smoothened homolog (Drosophila)                       |
| Lrp5       | Mm.20876 | BC011374  | 1   | 115      | 52        | 197      | 31        | 0.04353 | 1.71        | low density lipoprotein receptor-related protein 5    |

### TRANSCRIPTION FACTORS/REGULATION OF TRANSCRIPTION

| GeneSymbol | Genbank  | Unigene   | A/P | Ctl Mean | Ctl stdev | Exp Mean | Exp stdev | P-value | Fold Change | Gene Description                                                  |
|------------|----------|-----------|-----|----------|-----------|----------|-----------|---------|-------------|-------------------------------------------------------------------|
| Ebfaz      | Mm.23452 | NM_033327 | 1   | 458      | 122       | 182      | 68        | 0.01102 | -2.51       | early B-cell factor associated zinc finger protein                |
| Klf15      | Mm.41389 | BC013486  | 1   | 1583     | 480       | 749      | 243       | 0.03641 | -2.11       | Kruppel-like factor 15                                            |
| Creg       | Mm.459   | BC027426  | 1   | 3440     | 141       | 1724     | 148       | 0       | -2          | cellular repressor of E1A-stimulated genes                        |
| Creg       | Mm.459   | NM_011804 | 1   | 3372     | 213       | 1891     | 210       | 0.00006 | -1.78       | cellular repressor of E1A-stimulated genes                        |
| Lbx1h      | Mm.11681 | BB248430  | 1   | 3336     | 690       | 1959     | 283       | 0.02105 | -1.7        | lady bird-like homeobox 1 homolog (Drosophila)                    |
| Asb4       | Mm.51340 | AV113827  | 1   | 553      | 68        | 327      | 77        | 0.00483 | -1.69       | ankyrin repeat and SOCS box-containing protein 4                  |
| Hoxd9      | Mm.26544 | BC019150  | 1   | 391      | 44        | 233      | 57        | 0.00484 | -1.68       | homeo box D9                                                      |
| Pdcd7      | Mm.29193 | NM_016688 | 1   | 761      | 96        | 488      | 37        | 0.00624 | -1.56       | programmed cell death protein 7                                   |
| Edr1       | Mm.6822  | BE650359  | 1   | 965      | 166       | 632      | 179       | 0.03482 | -1.53       | early development regulator 1 (homolog of polyhomeotic 1)         |
| Csda       | Mm.19352 | AV216648  | 1   | 19266    | 3037      | 12740    | 2391      | 0.01492 | -1.51       | cold shock domain protein A                                       |
| Zfp352     | Mm.21464 | AF290196  | 1   | 59       | 17        | 90       | 10        | 0.02795 | 1.52        | zinc finger protein 352                                           |
| Ppargc1    | Mm.10707 | BM120569  | 1   | 950      | 189       | 1462     | 184       | 0.00828 | 1.54        | peroxisome proliferative activated receptor, gamma, coactivator 1 |
| Gcn5l2     | Mm.21883 | NM_020004 | 1   | 403      | 55        | 627      | 52        | 0.0011  | 1.56        | general control of amino acid synthesis-like 2 (yeast)            |
| Zfx        | Mm.919.3 | BC028506  | 1   | 104      | 30        | 163      | 17        | 0.02098 | 1.56        | zinc finger protein X-linked                                      |
| Zfp361     | Mm.18571 | BB036959  | 1   | 323      | 32        | 508      | 97        | 0.02274 | 1.57        | zinc finger protein 36, C3H type-like 1                           |

|             |          |           |   |      |      |       |      |         |      |                                                                           |
|-------------|----------|-----------|---|------|------|-------|------|---------|------|---------------------------------------------------------------------------|
| Nr2c1       | Mm.3398  | NM_011629 | 1 | 198  | 53   | 315   | 37   | 0.01584 | 1.59 | nuclear receptor subfamily 2, group C, member 1                           |
| Zfp292      | Mm.38193 | BF686420  | 1 | 199  | 59   | 321   | 69   | 0.03715 | 1.61 | zinc finger protein 292, Zn-15, Zn-16                                     |
| hr          | Mm.7598  | NM_021877 | 1 | 439  | 150  | 734   | 110  | 0.01967 | 1.67 | hairless                                                                  |
| Irf5        | Mm.6479  | NM_012057 | 1 | 677  | 90   | 1136  | 108  | 0.00063 | 1.68 | interferon regulatory factor 5                                            |
| Zfp62       | Mm.16650 | BC022935  | 1 | 393  | 113  | 663   | 151  | 0.02864 | 1.69 | zinc finger protein 62                                                    |
| Trpc3       | Mm.74363 | NM_019510 | 1 | 313  | 53   | 539   | 31   | 0.00074 | 1.72 | transient receptor potential cation channel, subfamily C, member 3        |
| Ankrd2      | Mm.14373 | NM_020033 | 1 | 7149 | 1877 | 12795 | 623  | 0.00465 | 1.79 | ankyrin repeat domain 2 (stretch responsive muscle)                       |
| Wbscr14     | Mm.34213 | AF245479  | 1 | 2420 | 151  | 4924  | 542  | 0.003   | 2.03 | Williams-Beuren syndrome chromosome region 14 homolog                     |
| Csrp3 (MLP) | Mm.17235 | NM_013808 | 1 | 4576 | 1782 | 10328 | 1636 | 0.00315 | 2.26 | cysteine-rich protein 3                                                   |
| Crap        | Mm.10279 | NM_013468 | 1 | 575  | 158  | 1460  | 492  | 0.0268  | 2.54 | cardiac responsive adriamycin protein                                     |
| Smarca1     | Mm.82922 | NM_053123 | 1 | 177  | 78   | 488   | 181  | 0.03445 | 2.76 | SWI/SNF rel, matrix assoc, actin dep reg chromatin, subfamily a, member 1 |
| Irf6        | Mm.4179  | NM_016851 | 1 | 108  | 15   | 316   | 118  | 0.04003 | 2.9  | interferon regulatory factor 6                                            |

#### EXTRACELLULAR/MATRIX/CYTOPLASMIC

| GeneSymbol   | Genbank  | Unigene   | A/P | Ctl Mean | Ctl stdev | Exp Mean | Exp stdev | P-value | Fold Change | Gene Description                                         |
|--------------|----------|-----------|-----|----------|-----------|----------|-----------|---------|-------------|----------------------------------------------------------|
| Fgfbp1       | Mm.46053 | U49641    | 1   | 286      | 93        | 143      | 54        | 0.04647 | -1.99       | fibroblast growth factor binding protein 1               |
| Tgfb1        | Mm.14455 | BB533460  | 1   | 2352     | 634       | 1291     | 186       | 0.03262 | -1.82       | transforming growth factor, beta induced                 |
| Chad         | Mm.8033  | NM_007689 | 1   | 1171     | 334       | 667      | 136       | 0.04955 | -1.75       | chondroadherin                                           |
| Tgfb1        | Mm.14455 | NM_009369 | 1   | 1720     | 379       | 1050     | 153       | 0.03063 | -1.64       | transforming growth factor, beta induced                 |
| Fgl2         | Mm.3040  | NM_008013 | 1   | 258      | 42        | 157      | 28        | 0.01108 | -1.64       | fibrinogen-like protein 2                                |
| Myoc         | Mm.10694 | AB013592  | 1   | 4240     | 774       | 2583     | 361       | 0.01784 | -1.64       | myocilin                                                 |
| Ltbp3        | Mm.21370 | BB324823  | 1   | 2201     | 403       | 1340     | 171       | 0.0171  | -1.64       | latent transforming growth factor beta binding protein 3 |
| Nov          | Mm.5167  | X96585    | 1   | 671      | 119       | 413      | 122       | 0.02394 | -1.62       | nephroblastoma overexpressed gene                        |
| Nov          | Mm.5167  | X96585    | 1   | 444      | 85        | 284      | 90        | 0.04188 | -1.56       | nephroblastoma overexpressed gene                        |
| Art5         | Mm.2816  | U60881    | 1   | 1323     | 192       | 867      | 67        | 0.01114 | -1.53       | ADP-ribosyltransferase 5                                 |
| Thbs4        | Mm.20865 | NM_011582 | 1   | 6115     | 798       | 4070     | 341       | 0.00925 | -1.5        | thrombospondin 4                                         |
| Apel-pending | Mm.29262 | BB819942  | 1   | 809      | 129       | 1232     | 112       | 0.0026  | 1.52        | apelin                                                   |
| Bmp5         | Mm.11958 | NM_007555 | 1   | 451      | 113       | 707      | 163       | 0.04966 | 1.57        | bone morphogenetic protein 5                             |
| Vtn          | Mm.3667  | BB251864  | 1   | 297      | 56        | 475      | 24        | 0.00446 | 1.6         | vitronectin                                              |
| Inha         | Mm.1100  | NM_010564 | 1   | 866      | 89        | 1526     | 225       | 0.00557 | 1.76        | inhibin alpha                                            |
| Ptx3         | Mm.4663  | NM_008987 | 1   | 698      | 141       | 1243     | 195       | 0.0063  | 1.78        | pentaxin related gene                                    |
| Angptl2      | Mm.19081 | NM_011923 | 1   | 537      | 244       | 1032     | 299       | 0.04284 | 1.92        | angiopoietin-like 2                                      |
| Gsn          | Mm.21109 | AV025588  | 1   | 206      | 122       | 477      | 85        | 0.01507 | 2.31        | gelsolin                                                 |
| Bdnf         | Mm.1442  | NM_007540 | 1   | 87       | 44        | 229      | 25        | 0.00269 | 2.62        | brain derived neurotrophic factor                        |
| Pdcd1lg1     | Mm.16868 | NM_021893 | 1   | 154      | 80        | 481      | 204       | 0.04094 | 3.11        | programmed cell death 1 ligand 1                         |
| Ifi30        | Mm.30241 | NM_023065 | 1   | 464      | 80        | 4647     | 770       | 0.0017  | 10          | interferon gamma inducible protein 30                    |

#### RECEPTORS

| GeneSymbol  | Genbank  | Unigene   | A/P | Ctl Mean | Ctl stdev | Exp Mean | Exp stdev | P-value | Fold Change | Gene Description                                              |
|-------------|----------|-----------|-----|----------|-----------|----------|-----------|---------|-------------|---------------------------------------------------------------|
| Ccr12       | Mm.7336  | AJ318863  | 1   | 864      | 87        | 286      | 147       | 0.00109 | -3.02       | chemokine (C-C motif) receptor-like 2                         |
| Fmod        | Mm.41573 | BB532202  | 1   | 6651     | 1663      | 3187     | 319       | 0.02641 | -2.09       | fibromodulin                                                  |
| Fmod        | Mm.41573 | BB504826  | 1   | 2587     | 715       | 1345     | 173       | 0.0433  | -1.92       | fibromodulin                                                  |
| Fmod        | Mm.41573 | BB235530  | 1   | 4500     | 895       | 2339     | 101       | 0.01727 | -1.92       | fibromodulin                                                  |
| Fmod        | Mm.41573 | BB483571  | 1   | 4407     | 1211      | 2297     | 143       | 0.04068 | -1.92       | fibromodulin                                                  |
| Fmod        | Mm.41573 | NM_021355 | 1   | 9283     | 1907      | 4851     | 469       | 0.02033 | -1.91       | fibromodulin                                                  |
| Xpr1        | Mm.89968 | BB667480  | 1   | 3014     | 288       | 1877     | 73        | 0.00466 | -1.61       | xenotropic and polytropic retrovirus receptor 1               |
| Kdr         | Mm.285   | NM_010612 | 1   | 2021     | 427       | 3154     | 334       | 0.00581 | 1.56        | kinase insert domain protein receptor                         |
| Tem8-pendin | Mm.29636 | AK013005  | 1   | 269      | 30        | 430      | 93        | 0.03088 | 1.59        | anthrax toxin receptor 1                                      |
| Nrp         | Mm.27448 | AK011144  | 1   | 1200     | 192       | 1912     | 197       | 0.00208 | 1.59        | neuropilin                                                    |
| Itgb1       | Mm.4712  | U37029    | 1   | 2801     | 681       | 4646     | 1059      | 0.03273 | 1.66        | integrin beta 1 (fibronectin receptor beta)                   |
| Ednrb       | Mm.22953 | BB770914  | 1   | 487      | 136       | 811      | 160       | 0.02205 | 1.66        | endothelin receptor type B                                    |
| Chrna1      | Mm.4583  | NM_007389 | 1   | 707      | 147       | 1195     | 66        | 0.00385 | 1.69        | cholinergic receptor, nicotinic, alpha polypeptide 1 (muscle) |
| Klra3       | Mm.19605 | U49865    | 1   | 494      | 165       | 852      | 220       | 0.04058 | 1.72        | killer cell lectin-like receptor, subfamily A, member 3       |
| Pdgfrb      | Mm.4146  | NM_008809 | 1   | 384      | 79        | 675      | 101       | 0.00405 | 1.75        | platelet derived growth factor receptor, beta polypeptide     |
| Tpra40-pend | Mm.22067 | NM_011906 | 1   | 1013     | 94        | 1892     | 266       | 0.00342 | 1.87        | transmembrane domain protein regulated in adipocytes          |
| Ntsr2       | Mm.5153  | NM_008747 | 1   | 278      | 89        | 974      | 293       | 0.01058 | 3.5         | neurotensin receptor 2                                        |

#### SIGNAL TRANSDUCTION

| GeneSymbol | Genbank  | Unigene  | A/P | Ctl Mean | Ctl stdev | Exp Mean | Exp stdev | P-value | Fold Change | Gene Description                                         |
|------------|----------|----------|-----|----------|-----------|----------|-----------|---------|-------------|----------------------------------------------------------|
| Gdap1      | Mm.18218 | AU017649 | 1   | 400      | 71        | 109      | 71        | 0.00115 | -3.66       | ganglioside-induced differentiation-associated-protein 1 |
| Gdap1      | NULL     | AK020672 | 1   | 1024     | 147       | 358      | 96        | 0.00065 | -2.86       | ganglioside-induced differentiation-associated-protein 1 |
| Txnl       | Mm.19169 | BG063276 | 1   | 105      | 26        | 41       | 37        | 0.03925 | -2.52       | thioredoxin-like                                         |
| DBC2       | Mm.22932 | AF420001 | 1   | 633      | 87        | 313      | 39        | 0.00258 | -2.02       | Rho-related BTB domain containing 2                      |

|          |          |           |   |       |      |       |      |         |       |                                                            |
|----------|----------|-----------|---|-------|------|-------|------|---------|-------|------------------------------------------------------------|
| Plekhh1  | Mm.26633 | NM_013746 | 1 | 2945  | 477  | 1595  | 167  | 0.00594 | -1.85 | pleckstrin homology domain containing, family B member 1   |
| Ramp1    | Mm.3272  | NM_016894 | 1 | 4458  | 893  | 2456  | 429  | 0.01561 | -1.82 | receptor (calcitonin) activity modifying protein 1         |
| Hdgf     | Mm.1141  | C80147    | 1 | 7884  | 1482 | 4758  | 725  | 0.01931 | -1.66 | hepatoma-derived growth factor                             |
| Park7    | Mm.2507  | BC002187  | 1 | 18919 | 2412 | 11915 | 1810 | 0.00352 | -1.59 | Parkinson disease (autosomal recessive, early onset) 7     |
| Park7    | Mm.2507  | BB255468  | 1 | 14208 | 1614 | 9109  | 775  | 0.0047  | -1.56 | Parkinson disease (autosomal recessive, early onset) 7     |
| Mapkapk5 | Mm.22612 | NM_010765 | 1 | 1691  | 229  | 2610  | 301  | 0.00286 | 1.54  | MAP kinase-activated protein kinase 5                      |
| Mpdz     | Mm.3140  | NM_010820 | 1 | 929   | 319  | 1448  | 274  | 0.04868 | 1.56  | multiple PDZ domain protein                                |
| Imap38   | Mm.19747 | NM_008376 | 1 | 291   | 78   | 457   | 38   | 0.01889 | 1.57  | immunity-associated protein                                |
| Rasgrp2  | Mm.20884 | NM_011242 | 1 | 244   | 63   | 386   | 33   | 0.01102 | 1.58  | guanyl releasing protein 2                                 |
| Rab22    | Mm.87650 | AK014407  | 1 | 1008  | 188  | 1609  | 160  | 0.00285 | 1.6   | RAB22, member RAS oncogene family                          |
| Il15     | Mm.4392  | NM_008357 | 1 | 905   | 169  | 1480  | 163  | 0.00275 | 1.63  | interleukin 15                                             |
| Iqgap1   | Mm.56685 | NM_016721 | 1 | 704   | 47   | 1154  | 46   | 0.00001 | 1.64  | IQ motif containing GTPase activating protein 1            |
| Tbc1d1   | Mm.56905 | BC004675  | 1 | 1626  | 305  | 2667  | 341  | 0.00392 | 1.64  | TBC1 domain family, member 1                               |
| Erbf2 IP | Mm.42478 | BM240030  | 1 | 146   | 39   | 244   | 54   | 0.03354 | 1.67  | vascular endothelial growth factor                         |
| Rgs5     | Mm.20954 | BF585144  | 1 | 3718  | 916  | 6210  | 1542 | 0.03899 | 1.67  | regulator of G-protein signaling 5                         |
| Eps8     | Mm.2012  | NM_007945 | 1 | 344   | 100  | 578   | 61   | 0.01071 | 1.68  | epidermal growth factor receptor pathway substrate 8       |
| Dapp1    | Mm.33987 | AF163255  | 1 | 231   | 10   | 411   | 26   | 0.00023 | 1.77  | dual adaptor for phosphotyrosine and 3-phosphoinositides 1 |
| Map3k5   | Mm.6595  | NM_008580 | 1 | 238   | 41   | 443   | 49   | 0.0007  | 1.86  | mitogen activated protein kinase kinase kinase 5           |
| Gucy1a3  | NULL     | AK004815  | 1 | 309   | 53   | 642   | 185  | 0.04063 | 2.08  | guanylate cyclase 1, soluble, alpha 3                      |
| Tbc1d1   | Mm.56905 | NM_019636 | 1 | 435   | 231  | 1199  | 497  | 0.04963 | 2.75  | TBC1 domain family, member 1                               |

#### POST-TRANSLATIONAL MODIFICATION

| GeneSymbol | Genbank   | Unigene   | A/P | Ctl Mean | Ctl stdev | Exp Mean | Exp stdev | P-value | Fold Change | Gene Description                                          |
|------------|-----------|-----------|-----|----------|-----------|----------|-----------|---------|-------------|-----------------------------------------------------------|
| Dusp10     | Mm.34912  | BC025066  | 1   | 1038     | 162       | 557      | 120       | 0.00316 | -1.86       | dual specificity phosphatase 1                            |
| Pkig       | Mm.10091  | BC026550  | 1   | 2171     | 231       | 1323     | 483       | 0.03415 | -1.64       | protein kinase inhibitor, gamma                           |
| Ptk9l      | Mm.21852  | BB397672  | 1   | 5475     | 794       | 3378     | 158       | 0.01398 | -1.62       | protein tyrosine kinase 9-like (A6-related protein)       |
| Styx       | Mm.158061 | NM_019637 | 1   | 3451     | 577       | 2176     | 289       | 0.01688 | -1.59       | Styx phosphoserine/threonine/tyrosine interaction protein |
| Rock1      | Mm.6710   | BB667679  | 1   | 439      | 76        | 659      | 97        | 0.01195 | 1.5         | Rho-associated coiled-coil forming kinase 1               |
| Mtmr7      | Mm.22271  | AV094609  | 1   | 151      | 25        | 242      | 43        | 0.01636 | 1.6         | myotubularin related protein 7                            |
| Dnaja4     | Mm.52319  | BQ176119  | 1   | 2940     | 642       | 4788     | 510       | 0.00407 | 1.63        | DnaJ (Hsp40) homolog, subfamily A, member 4               |
| Akap1      | Mm.2969   | NM_009648 | 1   | 999      | 109       | 1633     | 318       | 0.01956 | 1.64        | A kinase (PRKA) anchor protein 1                          |
| Dnaja4     | Mm.52319  | BC022948  | 1   | 2673     | 595       | 4706     | 688       | 0.00426 | 1.76        | DnaJ (Hsp40) homolog, subfamily A, member 4               |
| Dusp6      | Mm.1791   | NM_026268 | 1   | 669      | 126       | 1187     | 235       | 0.01166 | 1.78        | dual specificity phosphatase 6                            |
| SMAK       | Mm.7693   | AF112855  | 1   | 545      | 201       | 1125     | 350       | 0.03478 | 2.06        | serine/threonine kinase 2                                 |
| Ubl4       | Mm.3979   | BC010817  | 1   | 1480     | 455       | 3176     | 628       | 0.00723 | 2.15        | ubiquitin-like 4                                          |

#### MITOCHONDRIAL

| GeneSymbol | Genbank  | Unigene   | A/P | Ctl Mean | Ctl stdev | Exp Mean | Exp stdev | P-value | Fold Change | Gene Description                                                |
|------------|----------|-----------|-----|----------|-----------|----------|-----------|---------|-------------|-----------------------------------------------------------------|
| Oxct       | Mm.13445 | AK010029  | 1   | 8678     | 796       | 3299     | 740       | 0.00006 | -2.63       | 3-oxoacid CoA transferase                                       |
| Tst        | Mm.15312 | BC005644  | 1   | 1178     | 77        | 519      | 57        | 0.00001 | -2.27       | thiosulfate sulfurtransferase, mitochondrial                    |
| Oxct       | Mm.13445 | NM_024188 | 1   | 13492    | 757       | 6697     | 593       | 0.00001 | -2.01       | 3-oxoacid CoA transferase                                       |
| Slc40a1    | Mm.28756 | BC003438  | 1   | 2459     | 381       | 1278     | 135       | 0.00432 | -1.92       | solute carrier family 39 (iron-regulated transporter), member 1 |
| Slc25a20   | Mm.29666 | AV008091  | 1   | 2937     | 519       | 1552     | 247       | 0.00855 | -1.89       | solute carrier family 25, member 20                             |
| Oxct       | Mm.13445 | AV213379  | 1   | 4318     | 980       | 2395     | 228       | 0.03155 | -1.8        | 3-oxoacid CoA transferase                                       |
| Gpd2       | Mm.15595 | BC015270  | 1   | 394      | 44        | 257      | 46        | 0.00526 | -1.53       | glycerol phosphate dehydrogenase 2, mitochondrial               |
| Slc25a5    | Mm.658   | AA823938  | 1   | 2924     | 302       | 4426     | 471       | 0.00302 | 1.51        | solute carrier family 25, member5                               |
| Slc25a5    | Mm.658   | AV026569  | 1   | 3465     | 381       | 5295     | 763       | 0.01279 | 1.53        | solute carrier family 25, member5                               |
| KIF1B      | Mm.42027 | AF090190  | 1   | 2223     | 175       | 3413     | 519       | 0.01228 | 1.53        | kinesin family member 1B                                        |
| Aspn       | Mm.25755 | AF316825  | 1   | 695      | 205       | 1062     | 212       | 0.04755 | 1.53        | asporin                                                         |
| Slc25a5    | Mm.658   | U27316    | 1   | 2468     | 491       | 3905     | 286       | 0.00392 | 1.58        | solute carrier family 25, member5                               |
| Got2       | Mm.18916 | U82470    | 1   | 6975     | 1601      | 11614    | 2209      | 0.01925 | 1.67        | glutamate oxaloacetate transaminase 2, mitochondrial            |

#### MEMBRANE ASSOCIATED

| GeneSymbol   | Genbank  | Unigene   | A/P | Ctl Mean | Ctl stdev | Exp Mean | Exp stdev | P-value | Fold Change | Gene Description                                                 |
|--------------|----------|-----------|-----|----------|-----------|----------|-----------|---------|-------------|------------------------------------------------------------------|
| Cntnap2      | Mm.45210 | NM_025771 | 1   | 392      | 42        | 111      | 44        | 0.0001  | -3.51       | contactin associated protein-like 2                              |
| H47          | Mm.22362 | BB285733  | 1   | 632      | 198       | 297      | 49        | 0.04669 | -2.12       | histocompatibility 47                                            |
| Npc1         | Mm.3484  | BB769209  | 1   | 750      | 125       | 371      | 74        | 0.0035  | -2.02       | Niemann Pick type C1, autosomal recessive lipid storage disorder |
| Sdc4         | Mm.3815  | NM_011521 | 1   | 1015     | 176       | 579      | 76        | 0.01066 | -1.75       | syndecan 4                                                       |
| H47          | Mm.22362 | NM_024439 | 1   | 2400     | 311       | 1391     | 90        | 0.00836 | -1.72       | histocompatibility 47                                            |
| Pcolce2      | Mm.46016 | AF352788  | 1   | 1311     | 319       | 786      | 134       | 0.03872 | -1.67       | procollagen C-endopeptidase enhancer 2                           |
| Slc38a4      | Mm.22260 | AK003626  | 1   | 1524     | 183       | 943      | 216       | 0.00641 | -1.62       | solute carrier family 38, member 4, amino acid transporter       |
| C4st-pendinc | Mm.41887 | AV259240  | 1   | 88       | 20        | 56       | 12        | 0.04981 | -1.55       | chondroitin 4-sulfotransferase                                   |
| Calm3        | Mm.1147  | BB396904  | 1   | 5997     | 1121      | 3928     | 423       | 0.02603 | -1.53       | calmodulin 3                                                     |

|             |          |           |   |       |      |       |      |         |       |                                                                   |
|-------------|----------|-----------|---|-------|------|-------|------|---------|-------|-------------------------------------------------------------------|
| Bnip3l      | Mm.29820 | NM_009761 | 1 | 5083  | 862  | 3342  | 236  | 0.03008 | -1.52 | BCL2/adenovirus E1B 19kDa-interacting protein 3-like              |
| Semcap3-pe  | Mm.9944  | NM_018884 | 1 | 5038  | 1009 | 3340  | 433  | 0.0366  | -1.51 | semaF cytoplasmic domain associated protein 3                     |
| Fkbp8       | Mm.6565  | NM_010223 | 1 | 1910  | 402  | 1271  | 311  | 0.04591 | -1.5  | FK506 binding protein 8                                           |
| Abcc5       | Mm.20845 | NM_013790 | 1 | 1398  | 111  | 2111  | 138  | 0.0002  | 1.51  | ATP-binding cassette, sub-family C (CFTR/MRP), member 5           |
| Kcnj8       | Mm.1482  | NM_008428 | 1 | 1439  | 118  | 2175  | 246  | 0.00573 | 1.51  | potassium inwardly-rectifying channel, subfamily J, member 8      |
| Cav2        | Mm.31915 | NM_016900 | 1 | 2161  | 489  | 3277  | 169  | 0.0126  | 1.52  | caveolin 2                                                        |
| Pecam       | Mm.2822  | NM_008816 | 1 | 1699  | 252  | 2575  | 487  | 0.02418 | 1.52  | platelet/endothelial cell adhesion molecule                       |
| Gpsn2       | Mm.14251 | AK020708  | 1 | 21441 | 2272 | 32710 | 467  | 0.00232 | 1.53  | glycoprotein, synaptic 2                                          |
| Pnn         | Mm.22347 | AV135835  | 1 | 393   | 80   | 601   | 102  | 0.01871 | 1.53  | pinin                                                             |
| Abcg2       | Mm.19672 | NM_011920 | 1 | 1475  | 200  | 2266  | 153  | 0.00076 | 1.54  | ATP-binding cassette, sub-family G (WHITE), member 2              |
| Daf1        | Mm.10159 | BM208097  | 1 | 742   | 129  | 1166  | 225  | 0.02247 | 1.57  | decay accelerating factor 1                                       |
| Jcam2       | Mm.41758 | NM_023844 | 1 | 1392  | 272  | 2323  | 266  | 0.00274 | 1.67  | junction cell adhesion molecule 2                                 |
| Kcnb1       | Mm.54162 | BB324482  | 1 | 588   | 101  | 988   | 179  | 0.01165 | 1.68  | potassium voltage gated channel, Shab-related subfamily, member 1 |
| Bri3        | Mm.38011 | NM_018772 | 1 | 3863  | 533  | 6539  | 1017 | 0.00555 | 1.69  | brain protein 13                                                  |
| Atp1b2      | Mm.23520 | NM_013415 | 1 | 1755  | 707  | 3006  | 530  | 0.03    | 1.71  | ATPase, Na+/K+ transporting, beta 2 polypeptide                   |
| Sic28a2     | Mm.29510 | NM_021520 | 1 | 592   | 230  | 1066  | 190  | 0.01922 | 1.8   | solute carrier family 28, member 2                                |
| Msn         | Mm.28687 | NM_010833 | 1 | 556   | 233  | 1026  | 296  | 0.04706 | 1.84  | moesin                                                            |
| Gpsn2       | Mm.14251 | NM_134118 | 1 | 7752  | 1003 | 14338 | 1062 | 0.0001  | 1.85  | glycoprotein, synaptic 2                                          |
| Protein-pen | Mm.20030 | BC024519  | 1 | 418   | 23   | 772   | 101  | 0.00645 | 1.85  | protein protein                                                   |
| Aqp4        | Mm.18435 | BB193413  | 1 | 1445  | 455  | 2816  | 329  | 0.00457 | 1.95  | aquaporin 4                                                       |
| Scn3b       | Mm.45097 | BE951842  | 1 | 137   | 60   | 295   | 58   | 0.00936 | 2.15  | sodium channel, voltage-gated, type III, beta                     |
| Atp1b4      | Mm.60134 | NM_133690 | 1 | 383   | 143  | 1310  | 436  | 0.0156  | 3.42  | ATPase, (Na+)//K+ transporting, beta 4 polypeptide                |
| Cacnb4      | Mm.28404 | BB768064  | 1 | 32    | 35   | 173   | 84   | 0.03734 | 5.3   | calcium channel, voltage-dependent, beta 4 subunit                |

#### NUCLEIC ACID ASSOCIATED PROTEINS

| GeneSymbol  | Genbank  | Unigene   | A/P | Ctl Mean | Ctl stdev | Exp Mean | Exp stdev | P-value | Fold Change | Gene Description                                           |
|-------------|----------|-----------|-----|----------|-----------|----------|-----------|---------|-------------|------------------------------------------------------------|
| Hist2h2aa1  | Mm.10024 | BC010564  | 1   | 4830     | 834       | 2390     | 174       | 0.01057 | -2.02       | histone 2, H2aa1                                           |
| Sfpq        | Mm.140   | BE986849  | 1   | 4596     | 641       | 2532     | 197       | 0.00356 | -1.82       | splicing factor proline/glutamine rich                     |
| Snrnp       | Mm.43721 | NM_013670 | 1   | 7460     | 879       | 4373     | 1177      | 0.00568 | -1.71       | small nuclear ribonucleoprotein N                          |
| A2bp1-pendl | Mm.14380 | NM_021477 | 1   | 8715     | 1604      | 5340     | 468       | 0.01564 | -1.63       | ataxin 2 binding protein 1                                 |
| Orc2l       | Mm.3411  | AW539841  | 1   | 470      | 140       | 750      | 131       | 0.02716 | 1.6         | origin recognition complex, subunit 2-like (S. cerevisiae) |

#### PROTEIN CATABOLISM

| GeneSymbol | Genbank  | Unigene   | A/P | Ctl Mean | Ctl stdev | Exp Mean | Exp stdev | P-value | Fold Change | Gene Description                                                         |
|------------|----------|-----------|-----|----------|-----------|----------|-----------|---------|-------------|--------------------------------------------------------------------------|
| Pace4      | Mm.32906 | B1157485  | 1   | 1139     | 253       | 648      | 244       | 0.03171 | -1.76       | paired basic amino acid cleaving system 4, convertase                    |
| Prss11     | Mm.30156 | BB559067  | 1   | 1090     | 153       | 702      | 151       | 0.01138 | -1.55       | protease, serine, 11                                                     |
| Adams18    | Mm.10058 | NM_013906 | 1   | 227      | 68        | 353      | 67        | 0.03961 | 1.55        | disintegrin-like and metalloprotease with thrombospondin type 1 motif, 8 |
| Mest       | Mm.1089  | AW555393  | 1   | 457      | 63        | 720      | 50        | 0.00063 | 1.58        | mesoderm specific transcript                                             |
| Casp7      | Mm.35687 | BB752393  | 1   | 947      | 208       | 1524     | 175       | 0.0055  | 1.61        | caspase 7                                                                |

#### MISCELLANEOUS

| GeneSymbol   | Genbank  | Unigene   | A/P | Ctl Mean | Ctl stdev | Exp Mean | Exp stdev | P-value | Fold Change | Gene Description                                           |
|--------------|----------|-----------|-----|----------|-----------|----------|-----------|---------|-------------|------------------------------------------------------------|
| Fin15        | Mm.3421  | BB388301  | 1   | 100      | 9         | 46       | 19        | 0.00726 | -2.17       | fibroblast growth factor inducible 15                      |
| Kip2         | Mm.42192 | NM_019686 | 1   | 4082     | 455       | 2193     | 242       | 0.00075 | -1.86       | kinase interacting protein 2                               |
| Nudc         | Mm.69    | BB772682  | 1   | 628      | 70        | 357      | 73        | 0.00178 | -1.76       | nuclear distribution gene C homolog (Aspergillus)          |
| Sepr         | Mm.28212 | NM_013759 | 1   | 7857     | 407       | 4569     | 426       | 0.00003 | -1.72       | selenoprotein R                                            |
| Snx10        | Mm.29101 | AK010399  | 1   | 476      | 102       | 278      | 57        | 0.01994 | -1.71       | sorting nexin 10                                           |
| Cyt19-pendir | Mm.28566 | AK009814  | 1   | 1137     | 247       | 674      | 84        | 0.02383 | -1.69       | methyltransferase Cyt19                                    |
| Rrs1         | Mm.29061 | NM_021511 | 1   | 1296     | 170       | 766      | 158       | 0.00388 | -1.69       | RRS1 ribosome biogenesis regulator homolog (S. cerevisiae) |
| Anapc5       | Mm.45312 | BF720337  | 1   | 20876    | 968       | 13062    | 936       | 0.00002 | -1.6        | anaphase-promoting complex subunit 5                       |
| Myd116       | Mm.4048  | NM_008654 | 1   | 1287     | 159       | 810      | 106       | 0.00425 | -1.59       | myeloid differentiation primary response gene 116          |
| Anapc5       | Mm.45312 | A1842295  | 1   | 20395    | 1205      | 13058    | 1099      | 0.00011 | -1.56       | anaphase-promoting complex subunit 5                       |
| Anapc5       | Mm.45312 | BF019960  | 1   | 8318     | 752       | 5404     | 363       | 0.00222 | -1.54       | anaphase-promoting complex subunit 5                       |
| Anapc5       | Mm.45312 | NM_021505 | 1   | 14940    | 1529      | 9792     | 723       | 0.00369 | -1.53       | anaphase-promoting complex subunit 5                       |
| Rbl2         | Mm.28027 | U47333    | 1   | 1387     | 150       | 911      | 17        | 0.00807 | -1.52       | retinoblastoma-like 2                                      |
| Narg1        | Mm.28256 | NM_053089 | 1   | 1280     | 57        | 1929     | 251       | 0.01521 | 1.51        | NMDA receptor-regulated gene 1                             |
| Mcpr         | Mm.3989  | BE306910  | 1   | 404      | 106       | 620      | 95        | 0.02304 | 1.54        | meiotic check point regulator                              |
| Cryab        | Mm.178   | NM_009964 | 1   | 15376    | 2116      | 24324    | 1311      | 0.00081 | 1.58        | crystallin, alpha B                                        |
| Macf1        | Mm.3350  | BM248206  | 1   | 838      | 54        | 1404     | 294       | 0.03258 | 1.67        | microtubule-actin crosslinking factor 1                    |
| Catnal1      | Mm.21889 | BQ031240  | 1   | 252      | 35        | 429      | 61        | 0.00413 | 1.7         | catenin alpha-like 1                                       |
| Pdgfb        | Mm.14408 | NM_011057 | 1   | 388      | 59        | 665      | 105       | 0.00595 | 1.72        | platelet derived growth factor, B polypeptide              |
| Frap1        | Mm.21158 | NM_020009 | 1   | 1370     | 195       | 2358     | 202       | 0.00042 | 1.72        | FK506 binding protein 12-rapamycin associated protein 1    |
| Cnt2         | Mm.24621 | BM216130  | 1   | 266      | 25        | 464      | 76        | 0.00805 | 1.74        | cyclin T2                                                  |

|       |          |           |   |      |     |      |      |         |      |                                                             |
|-------|----------|-----------|---|------|-----|------|------|---------|------|-------------------------------------------------------------|
| Ifit2 | Mm.2036  | NM_008332 | 1 | 88   | 9   | 160  | 27   | 0.00831 | 1.8  | interferon-induced protein with tetratricopeptide repeats 2 |
| Nupl1 | Mm.18583 | AK006062  | 1 | 96   | 45  | 179  | 44   | 0.03914 | 1.86 | nucleoporin like 1                                          |
| Mttp  | Mm.2941  | AW553649  | 1 | 89   | 38  | 190  | 42   | 0.01194 | 2.13 | microsomal triglyceride transfer protein                    |
| Cegf1 | Mm.40447 | B1133839  | 1 | 133  | 47  | 373  | 79   | 0.00349 | 2.8  | CUB domain and EGF-like repeat containing 1                 |
| Smoc1 | Mm.27643 | NM_022316 | 1 | 302  | 134 | 994  | 144  | 0.00042 | 3.28 | SPARC related modular calcium binding 1                     |
| G0s2  | Mm.3283  | NM_008059 | 1 | 1417 | 466 | 5453 | 1695 | 0.01941 | 3.85 | G0/G1 switch gene 2                                         |

#### UNKNOWN

| GeneSymbol   | Genbank  | Unigene   | A/P | Ctl Mean | Ctl stdev | Exp Mean | Exp stdev | P-value | Fold Change | Gene Description                                               |
|--------------|----------|-----------|-----|----------|-----------|----------|-----------|---------|-------------|----------------------------------------------------------------|
| 6330565B14   | Mm.28514 | BC026584  | 1   | 1190     | 151       | 334      | 38        | 0.00163 | -3.56       | 6330565B14Rik RIKEN cDNA 6330565B14 gene                       |
| 1810057C19   | Mm.10339 | NM_026433 | 1   | 691      | 244       | 221      | 62        | 0.03374 | -3.12       | 1810057C19Rik RIKEN cDNA 1810057C19 gene                       |
| A930031D07   | Mm.20844 | A1426503  | 1   | 246      | 83        | 79       | 39        | 0.02236 | -3.09       | A930031D07Rik RIKEN cDNA A930031D07 gene                       |
| E330010H22   | Mm.19669 | NM_133232 | 1   | 5938     | 986       | 2198     | 385       | 0.00212 | -2.7        | E330010H22Rik RIKEN cDNA E330010H22 gene                       |
| 1810008K03   | Mm.35083 | BC025169  | 1   | 5386     | 1845      | 2048     | 919       | 0.03173 | -2.63       | 1810008K03Rik RIKEN cDNA 1810008K03 gene                       |
| A930031D07   | Mm.20844 | BQ266468  | 1   | 440      | 142       | 172      | 53        | 0.02426 | -2.56       | A930031D07Rik RIKEN cDNA A930031D07 gene                       |
| 1700037B15   | Mm.19580 | AV251625  | 1   | 9045     | 446       | 3739     | 381       | 0       | -2.42       | 1700037B15Rik RIKEN cDNA 1700037B15 gene                       |
| 0610040J01f  | Mm.38143 | BC004797  | 1   | 605      | 33        | 252      | 173       | 0.02819 | -2.4        | 0610040J01Rik RIKEN cDNA 0610040J01 gene                       |
| 2610002J02f  | Mm.10374 | AV218922  | 1   | 113      | 24        | 47       | 31        | 0.01582 | -2.39       | 2610002J02Rik RIKEN cDNA 2610002J02 gene                       |
| 1700064K09   | Mm.20095 | BC024415  | 1   | 638      | 67        | 273      | 69        | 0.00029 | -2.33       | 1700064K09Rik RIKEN cDNA 1700064K09 gene                       |
| 6330565B14   | Mm.28514 | BC026584  | 1   | 1065     | 195       | 477      | 39        | 0.00981 | -2.23       | 6330565B14Rik RIKEN cDNA 6330565B14 gene                       |
| Selenbp1     | Mm.19655 | NM_009150 | 1   | 841      | 166       | 378      | 36        | 0.01237 | -2.22       | Selenbp1 selenium binding protein 1                            |
| NULL         | Mm.27612 | BC026208  | 1   | 1594     | 177       | 725      | 171       | 0.00041 | -2.2        | Mus musculus expressed sequence AW742413                       |
| 0710001E10   | Mm.41630 | NM_026161 | 1   | 314      | 43        | 143      | 59        | 0.00558 | -2.19       | 0710001E10Rik RIKEN cDNA 0710001E10 gene                       |
| 1700037B15   | Mm.19580 | AF335325  | 1   | 9411     | 761       | 4422     | 569       | 0.00004 | -2.13       | 1700037B15Rik RIKEN cDNA 1700037B15 gene                       |
| 1200009H11   | Mm.30950 | AK004672  | 1   | 1335     | 461       | 644      | 133       | 0.03788 | -2.07       | 1200009H11Rik RIKEN cDNA 1200009H11 gene                       |
| 4631422C05   | Mm.20042 | B1648645  | 1   | 3863     | 536       | 1886     | 565       | 0.00229 | -2.05       | 4631422C05Rik RIKEN cDNA 4631422C05 gene                       |
| 3300001H21   | Mm.22097 | AV171622  | 1   | 1207     | 252       | 587      | 108       | 0.01075 | -2.05       | 3300001H21Rik RIKEN cDNA 3300001H21 gene                       |
| 0610025I19f  | Mm.27395 | AK002661  | 1   | 3124     | 452       | 1535     | 283       | 0.00191 | -2.03       | 0610025I19Rik RIKEN cDNA 0610025I19 gene                       |
| 4631422C05   | Mm.20042 | B8068040  | 1   | 3291     | 423       | 1645     | 185       | 0.00207 | -2          | 4631422C05Rik RIKEN cDNA 4631422C05 gene                       |
| Rex3         | Mm.14768 | NM_009052 | 1   | 3756     | 1093      | 1901     | 220       | 0.04488 | -1.97       | Rex3 reduced expression 3                                      |
| 2310043K02   | Mm.23916 | BC018204  | 1   | 2796     | 209       | 1442     | 178       | 0.00006 | -1.94       | 2310043K02Rik RIKEN cDNA 2310043K02 gene                       |
| 1810006G21   | Mm.28397 | BG063931  | 1   | 695      | 175       | 364      | 109       | 0.02402 | -1.91       | 1810006G21Rik RIKEN cDNA 1810006G21 gene                       |
| 1300010A20   | Mm.22528 | B1440178  | 1   | 159      | 26        | 83       | 17        | 0.00502 | -1.9        | 1300010A20Rik RIKEN cDNA 1300010A20 gene                       |
| 4930553M18   | Mm.21831 | AK016109  | 1   | 102      | 23        | 54       | 31        | 0.04685 | -1.9        | 4930553M18Rik RIKEN cDNA 4930553M18 gene                       |
| EIG180       | Mm.24631 | NM_133237 | 1   | 159      | 38        | 87       | 16        | 0.02591 | -1.83       | EIG180 ethanol induced gene product EIG180                     |
| 1110018E21   | Mm.38238 | BC003284  | 1   | 700      | 71        | 397      | 139       | 0.01804 | -1.76       | 1110018E21Rik RIKEN cDNA 1110018E21 gene                       |
| 1700027M01   | Mm.17880 | NM_023544 | 1   | 882      | 133       | 503      | 105       | 0.00428 | -1.75       | 1700027M01Rik RIKEN cDNA 1700027M01 gene                       |
| 4631422C05   | Mm.20042 | B1648645  | 1   | 1853     | 459       | 1058     | 150       | 0.03025 | -1.75       | 4631422C05Rik RIKEN cDNA 4631422C05 gene                       |
| NULL         | Mm.15038 | AW556821  | 1   | 358      | 73        | 206      | 78        | 0.02997 | -1.74       | Mus musculus adult male olfactory brain cDNA, clone:6430524C05 |
| C330021A05   | Mm.22004 | BQ175552  | 1   | 2741     | 465       | 1596     | 300       | 0.00906 | -1.72       | C330021A05Rik RIKEN cDNA C330021A05 gene                       |
| 1110032A03   | Mm.17137 | NM_023483 | 1   | 1024     | 71        | 599      | 96        | 0.0004  | -1.71       | 1110032A03Rik RIKEN cDNA 1110032A03 gene                       |
| AL024210     | Mm.19006 | AU046270  | 1   | 5420     | 1127      | 3167     | 139       | 0.02867 | -1.71       | AL024210 expressed sequence AL024210                           |
| BC021921     | Mm.15578 | BC021921  | 1   | 58       | 9         | 34       | 11        | 0.01698 | -1.7        | BC021921 cDNA sequence BC021921                                |
| 1110023P21   | Mm.22284 | NM_025390 | 1   | 516      | 94        | 306      | 53        | 0.01173 | -1.69       | 1110023P21Rik RIKEN cDNA 1110023P21                            |
| NULL         | Mm.21884 | BC024118  | 1   | 2269     | 495       | 1343     | 239       | 0.02816 | -1.69       | LOC219134 hypothetical protein BC024118                        |
| 2310007H09   | Mm.18775 | AK009207  | 1   | 479      | 40        | 284      | 75        | 0.00622 | -1.68       | 2310007H09Rik RIKEN cDNA 2310007H09 gene                       |
| Bach-pendinc | Mm.19752 | NM_133348 | 1   | 1435     | 146       | 855      | 193       | 0.00309 | -1.68       | Bach-pending brain acyl-CoA hydrolase                          |
| 1110006I15f  | Mm.30020 | NM_134142 | 1   | 7362     | 1651      | 4421     | 1592      | 0.04267 | -1.67       | 1110006I15Rik RIKEN cDNA 1110006I15 gene                       |
| Pm5-pendinc  | Mm.22121 | BC024503  | 1   | 729      | 64        | 438      | 92        | 0.00359 | -1.66       | Pm5-pending pM5 protein                                        |
| 1810006G21   | Mm.28397 | BG063931  | 1   | 361      | 40        | 219      | 37        | 0.00221 | -1.65       | 1810006G21Rik RIKEN cDNA 1810006G21 gene                       |
| MGC28663     | Mm.41308 | BC025120  | 1   | 1080     | 243       | 653      | 89        | 0.02991 | -1.65       | MGC28663 hypothetical protein MGC28663                         |
| 2310005P05   | Mm.6825  | NM_026189 | 1   | 2247     | 150       | 1370     | 232       | 0.00145 | -1.64       | 2310005P05Rik RIKEN cDNA 2310005P05 gene                       |
| NULL         | Mm.21597 | BB323985  | 1   | 1931     | 280       | 1177     | 190       | 0.0067  | -1.64       | AI115348 expressed sequence AI115348                           |
| C430041M20   | Mm.18654 | BG094881  | 1   | 854      | 128       | 520      | 111       | 0.00768 | -1.64       | C430041M20 hypothetical protein C430041M20                     |
| NULL         | Mm.11928 | AV127170  | 1   | 2002     | 241       | 1223     | 31        | 0.00773 | -1.64       | EST                                                            |
| C130069N12   | Mm.28506 | NM_133895 | 1   | 822      | 146       | 506      | 88        | 0.01417 | -1.62       | C130069N12Rik RIKEN cDNA C130069N12 gene                       |
| AI115348     | Mm.21597 | BC022157  | 1   | 4641     | 616       | 2888     | 201       | 0.00568 | -1.61       | AI115348 expressed sequence AI115348                           |
| 0610007P06   | Mm.28679 | BC003916  | 1   | 1656     | 180       | 1034     | 53        | 0.00272 | -1.6        | 0610007P06Rik RIKEN cDNA 0610007P06 gene                       |
| 9230117N10   | Mm.18235 | NM_133775 | 1   | 489      | 91        | 304      | 24        | 0.03022 | -1.6        | 9230117N10Rik RIKEN cDNA 9230117N10 gene                       |
| 2310032D16   | Mm.28697 | AV291259  | 1   | 10155    | 2400      | 6406     | 1433      | 0.04377 | -1.59       | 2310032D16Rik RIKEN cDNA 2310032D16 gene                       |
| 2510005D08   | Mm.45225 | NM_026526 | 1   | 1330     | 76        | 843      | 50        | 0.00013 | -1.58       | 2510005D08Rik RIKEN cDNA 2510005D08 gene                       |
| D0H4S114     | Mm.4919  | BB369191  | 1   | 4468     | 590       | 2828     | 638       | 0.00931 | -1.58       | D0H4S114 DNA segment, human D4S114                             |
| AI842353     | Mm.24417 | AI842353  | 1   | 401      | 65        | 253      | 69        | 0.02151 | -1.58       | AI842353 expressed sequence AI842353                           |
| Pm5-pendinc  | Mm.22121 | BC024503  | 1   | 3225     | 218       | 2053     | 61        | 0.00195 | -1.57       | Pm5-pending pM5 protein                                        |
| NULL         | Mm.10024 | BC010564  | 1   | 2062     | 258       | 1327     | 125       | 0.00697 | -1.55       | Mus musculus, similar to histone H2A, clone IMAGE:3582122      |

|              |           |           |          |   |      |      |      |      |         |       |                                                                            |
|--------------|-----------|-----------|----------|---|------|------|------|------|---------|-------|----------------------------------------------------------------------------|
| AV229935     | RJ        | Mm.29877  | AV229935 | 1 | 1439 | 154  | 930  | 35   | 0.00766 | -1.55 | Mus musculus cDNA clone 4631422K22 3'                                      |
| D0H4S114     | Mm.4919   | D45203    |          | 1 | 5330 | 607  | 3473 | 307  | 0.00548 | -1.53 | D0H4S114 DNA segment, human D4S114                                         |
| 2310007F12I  | Mm.8142   | BQ177187  |          | 1 | 267  | 36   | 175  | 30   | 0.00833 | -1.53 | 2310007F12Rik RIKEN cDNA 2310007F12 gene                                   |
| 2900046G09   | Mm.19651  | BC003957  |          | 1 | 1187 | 45   | 780  | 35   | 0.00001 | -1.52 | 2900046G09Rik RIKEN cDNA 2900046G09 gene                                   |
| E130307M08   | Mm.34488  | BC017625  |          | 1 | 2349 | 219  | 1544 | 134  | 0.00153 | -1.52 | E130307M08Rik RIKEN cDNA E130307M08 gene                                   |
| 493342L07I   | Mm.17382  | BB549381  |          | 1 | 889  | 55   | 587  | 90   | 0.00231 | -1.52 | 493342L07Rik RIKEN cDNA 493342L07 gene                                     |
| AI595338     | Mm.20027  | BM241485  |          | 1 | 296  | 48   | 195  | 22   | 0.01906 | -1.52 | AI595338 expressed sequence AI595338                                       |
| LOC228785    | Mm.20288  | BC019408  |          | 1 | 8569 | 1286 | 5649 | 1373 | 0.021   | -1.52 | LOC228785 hypothetical protein LOC228785                                   |
| 9430059P22I  | Mm.21884  | BC024118  |          | 1 | 2529 | 280  | 1674 | 246  | 0.00376 | -1.51 | 9430059P22Rik RIKEN cDNA 9430059P22 gene                                   |
| NULL         | Mm.42027  | BI109632  |          | 1 | 1636 | 354  | 2457 | 209  | 0.01041 | 1.5   | NCL_CGAP_Mam5 Mus musculus cDNA clone IMAGE:5027280 5'                     |
| 1700062C23   | Mm.8540   | AK005819  |          | 1 | 289  | 66   | 437  | 44   | 0.01413 | 1.51  | 1700062C23Rik RIKEN cDNA 1700062C23 gene                                   |
| BB737680     | RJ        | Mm.29030  | BB737680 | 1 | 2762 | 607  | 4167 | 775  | 0.0291  | 1.51  | 6 days neonate spleen Mus musculus cDNA clone F430014N09 3'                |
| C820004H04   | Mm.21147  | AV253284  |          | 1 | 384  | 108  | 579  | 86   | 0.03057 | 1.51  | C820004H04Rik RIKEN cDNA C820004H04 gene                                   |
| NULL         | Mm.46025  | AV299914  |          | 1 | 351  | 97   | 533  | 34   | 0.02428 | 1.52  | 8 days embryo Mus musculus cDNA clone 5730472D08 3'                        |
| 2510005D08   | Mm.45225  | BF730076  |          | 1 | 1157 | 398  | 1754 | 238  | 0.04999 | 1.52  | 2510005D08Rik RIKEN cDNA 2510005D08 gene                                   |
| 2210404N08   | Mm.34874  | BC026453  |          | 1 | 614  | 41   | 938  | 51   | 0.00007 | 1.53  | 2210404N08Rik RIKEN cDNA 2210404N08 gene                                   |
| NULL         | Mm.25864  | BI697630  |          | 1 | 347  | 76   | 532  | 20   | 0.01818 | 1.53  | EST                                                                        |
| NULL         | Mm.25312  | BB500104  |          | 1 | 273  | 44   | 418  | 79   | 0.02398 | 1.53  | ESTs                                                                       |
| NULL         | Mm.23491  | AI505784  |          | 1 | 302  | 59   | 461  | 88   | 0.03033 | 1.53  | mouse embryonic region Mus musculus cDNA clone IMAGE:906296 3'             |
| 6330505F04I  | Mm.32498  | BB460424  |          | 1 | 543  | 148  | 834  | 81   | 0.01852 | 1.54  | 6330505F04Rik RIKEN cDNA 6330505F04 gene                                   |
| 5033428E16I  | Mm.64201  | NM_024435 |          | 1 | 322  | 37   | 494  | 99   | 0.03116 | 1.54  | 5033428E16Rik RIKEN cDNA 5033428E16 gene                                   |
| 1810073P09I  | Mm.20215  | BB278286  |          | 1 | 204  | 62   | 315  | 16   | 0.04094 | 1.54  | 1810073P09Rik RIKEN cDNA 1810073P09 gene                                   |
| NULL         | Mm.29616  | AV375176  |          | 1 | 248  | 75   | 382  | 76   | 0.04752 | 1.54  | LOC212285 hypothetical protein LOC212285                                   |
| NULL         | Mm.13768  | AV377356  |          | 1 | 296  | 57   | 458  | 75   | 0.01418 | 1.55  | Similar to bromodomain adjacent to zinc finger domain, 2A, clone MGC:38682 |
| AV369255     | RJ        | Mm.16122  | AV369255 | 1 | 656  | 152  | 1017 | 207  | 0.03126 | 1.55  | AV369255 RIKEN full-length enriched similar to M55637 Mus musculus HAM1    |
| 2600011C06   | Mm.46005  | BG228787  |          | 1 | 239  | 61   | 372  | 55   | 0.01772 | 1.56  | 2600011C06Rik RIKEN cDNA 2600011C06 gene                                   |
| EST          | Mm.25247  | AI154956  |          | 1 | 878  | 195  | 1376 | 131  | 0.00822 | 1.57  | ESTs                                                                       |
| AA407930     | Mm.24521  | NM_133349 |          | 1 | 749  | 73   | 1183 | 98   | 0.00041 | 1.58  | AA407930 expressed sequence AA407930                                       |
| C330016H24   | Mm.21406  | BF319466  |          | 1 | 777  | 129  | 1230 | 139  | 0.0031  | 1.58  | C330016H24Rik RIKEN cDNA C330016H24 gene                                   |
| EST          | Mm.28337  | AK014605  |          | 1 | 771  | 53   | 1221 | 180  | 0.00881 | 1.58  | hypothetical ABC1 family containing protein                                |
| EST          | Mm.33838  | NM_133901 |          | 1 | 671  | 164  | 1060 | 181  | 0.01941 | 1.58  | AI481500 expressed sequence AI481500                                       |
| NGP-1        | Mm.90760  | BI666155  |          | 1 | 154  | 38   | 244  | 29   | 0.00917 | 1.59  | similar to Autoantigen NGP-1, mmr1/hsr1 family of gtp-binding proteins.    |
| Flana-pendin | Mm.28131  | BB389641  |          | 1 | 444  | 78   | 704  | 127  | 0.01744 | 1.59  | Flana-pending carcinoma related gene                                       |
| 9130022A11   | Mm.23834  | BE981916  |          | 1 | 1077 | 237  | 1720 | 260  | 0.01073 | 1.6   | 9130022A11Rik RIKEN cDNA 9130022A11 gene                                   |
| EST          | Mm.27585  | BG063148  |          | 1 | 199  | 52   | 318  | 46   | 0.01459 | 1.6   | ESTs, Weakly similar to tufelin 1 [Mus musculus]                           |
| EST          | Mm.27132  | BC026425  |          | 1 | 658  | 190  | 1058 | 99   | 0.01365 | 1.61  | Mus musculus RIKEN cDNA 2410013I23 gene                                    |
| NULL         | Mm.25739  | BC021408  |          | 1 | 416  | 139  | 670  | 71   | 0.03184 | 1.61  | EST                                                                        |
| 1100001I23F  | Mm.29386  | BB807707  |          | 1 | 2476 | 337  | 4023 | 397  | 0.00103 | 1.62  | 1100001I23Rik RIKEN cDNA 1100001I23 gene                                   |
| E230009N18   | Mm.20085  | BG067039  |          | 1 | 2758 | 461  | 4460 | 204  | 0.00253 | 1.62  | E230009N18Rik RIKEN cDNA E230009N18 gene                                   |
| Hn1          | Mm.1775   | NM_008258 |          | 1 | 1043 | 291  | 1692 | 148  | 0.01652 | 1.62  | Hn1 hematological and neurological expressed sequence 1                    |
| 2310035K24   | Mm.2937.2 | AK009634  |          | 1 | 811  | 260  | 1315 | 165  | 0.02233 | 1.62  | 2310035K24Rik RIKEN cDNA 2310035K24 gene                                   |
| NULL         | Mm.24481  | BE686667  |          | 1 | 1413 | 252  | 2309 | 343  | 0.00565 | 1.63  | ESTs                                                                       |
| 1810007M14   | Mm.347    | NM_026110 |          | 1 | 429  | 139  | 703  | 98   | 0.02355 | 1.64  | 1810007M14Rik RIKEN cDNA 1810007M14 gene                                   |
| LOC217517    | Mm.22029  | BC024598  |          | 1 | 185  | 74   | 303  | 39   | 0.03771 | 1.64  | LOC217517 amisyn                                                           |
| EST          | Mm.77017  | BE688720  |          | 1 | 429  | 52   | 710  | 75   | 0.0017  | 1.65  | Similar to RAS, guanyl releasing protein 2, clone IMAGE:4481738            |
| EST          | Mm.17873  | BG071991  |          | 1 | 504  | 71   | 838  | 92   | 0.00125 | 1.66  | Mus musculus adult male corpora quadrigemina cDNA, clone:B230364F10        |
| Niban        | Mm.15770  | NM_022018 |          | 1 | 386  | 77   | 641  | 86   | 0.00458 | 1.66  | Niban niban protein                                                        |
| BB410567     | RJ        | Mm.26219  | BB410567 | 1 | 217  | 53   | 359  | 73   | 0.02579 | 1.66  | 7 days embryo Mus musculus cDNA clone C430018P22 3'                        |
| 2310047I15F  | Mm.21967  | AW744519  |          | 1 | 438  | 71   | 728  | 186  | 0.04401 | 1.66  | 2310047I15Rik RIKEN cDNA 2310047I15 gene                                   |
| NULL         | Mm.27785  | BB834097  |          | 1 | 272  | 66   | 453  | 117  | 0.04414 | 1.66  | AU018638 expressed sequence AU018638                                       |
| NULL         | Mm.22242  | BG071867  |          | 1 | 778  | 109  | 1306 | 71   | 0.00048 | 1.68  | AW112037 expressed sequence AW112037                                       |
| 6430548M08   | Mm.10195  | BB282696  |          | 1 | 272  | 45   | 456  | 49   | 0.00159 | 1.68  | 6430548M08Rik RIKEN cDNA 6430548M08 gene                                   |
| Meg3         | Mm.20050  | Y13832    |          | 1 | 612  | 119  | 1030 | 145  | 0.00431 | 1.68  | Meg3 maternally expressed gene 3                                           |
| NULL         | Mm.22034  | BF682801  |          | 1 | 366  | 83   | 616  | 83   | 0.00554 | 1.68  | Mus musculus cDNA clone IMAGE:3468213 5'                                   |
| NULL         | Mm.15389  | BB436856  |          | 1 | 298  | 84   | 499  | 79   | 0.01311 | 1.68  | C79248 expressed sequence C79248                                           |
| NULL         | Mm.41268  | BB252740  |          | 1 | 201  | 46   | 338  | 75   | 0.02688 | 1.68  | 7 days neonate cerebellum Mus musculus cDNA clone A730053E12 3'            |
| D930015E06   | Mm.28838  | BM234701  |          | 1 | 429  | 181  | 722  | 87   | 0.04363 | 1.68  | D930015E06Rik RIKEN cDNA D930015E06 gene                                   |
| 2810432L12I  | Mm.24564  | BC013800  |          | 1 | 1767 | 43   | 2996 | 124  | 0.00005 | 1.7   | 2810432L12Rik RIKEN cDNA 2810432L12 gene                                   |
| 2310020L09I  | Mm.29293  | AK009425  |          | 1 | 728  | 101  | 1241 | 211  | 0.01198 | 1.7   | 2310020L09Rik RIKEN cDNA 2310020L09 gene                                   |
| EST          | Mm.77017  | BE688720  |          | 1 | 350  | 89   | 598  | 21   | 0.01243 | 1.71  | Similar to RAS, guanyl releasing protein 2, clone IMAGE:4481738            |
| NULL         | Mm.3386   | BM117918  |          | 1 | 388  | 80   | 668  | 47   | 0.00184 | 1.72  | NIA Mouse Newborn Brain cDNA Library Mus musculus cDNA L0858A06 3'         |
| F730027O18   | Mm.21300  | AI463328  |          | 1 | 210  | 26   | 366  | 54   | 0.00664 | 1.74  | F730027O18Rik RIKEN cDNA F730027O18 gene                                   |
| C030022K24   | Mm.15992  | BC019151  |          | 1 | 198  | 67   | 347  | 72   | 0.02326 | 1.75  | C030022K24Rik RIKEN cDNA C030022K24 gene                                   |
| D13Wsu123e   | Mm.20585  | BC013625  |          | 1 | 1374 | 130  | 2422 | 80   | 0.00004 | 1.76  | D13Wsu123e DNA segment, Chr 13, Wayne State University 123, expressed      |
| C730024G01   | Mm.34198  | BE653749  |          | 1 | 323  | 51   | 568  | 123  | 0.02155 | 1.76  | C730024G01Rik RIKEN cDNA C730024G01 gene                                   |
| 2700038N03   | Mm.21836  | NM_027356 |          | 1 | 1018 | 37   | 1818 | 264  | 0.00929 | 1.79  | 2700038N03Rik RIKEN cDNA 2700038N03 gene                                   |
| Yap          | Mm.4885   | BG070675  |          | 1 | 440  | 188  | 787  | 147  | 0.02721 | 1.79  | Yap yes-associated protein                                                 |

|             |          |           |   |      |     |      |     |         |      |                                                                            |
|-------------|----------|-----------|---|------|-----|------|-----|---------|------|----------------------------------------------------------------------------|
| Doc2g       | Mm.40194 | NM_021791 | 1 | 230  | 32  | 413  | 38  | 0.00035 | 1.79 | Mus musculus 16 days neonate heart cDNA, clone:D830013018                  |
| 1300013J15F | Mm.10074 | NM_026183 | 1 | 2836 | 363 | 5123 | 504 | 0.00073 | 1.81 | 1300013J15Rik RIKEN cDNA 1300013J15 gene                                   |
| NULL        | Mm.21464 | BC018558  | 1 | 397  | 141 | 729  | 103 | 0.00907 | 1.83 | fatty acid binding protein 4, adipocyte, clone MGC:18548 IMAGE:3670866     |
| NULL        | Mm.24936 | BE957307  | 1 | 296  | 90  | 541  | 127 | 0.02555 | 1.83 | ESTs                                                                       |
| Meg3        | Mm.20050 | BM119226  | 1 | 117  | 49  | 216  | 37  | 0.01898 | 1.85 | Meg3 maternally expressed gene 3                                           |
| 2310047C17  | Mm.35669 | BC028439  | 1 | 227  | 59  | 422  | 74  | 0.00642 | 1.86 | 2310047C17Rik RIKEN cDNA 2310047C17 gene                                   |
| NULL        | Mm.35523 | BE952347  | 1 | 92   | 11  | 174  | 20  | 0.00098 | 1.89 | ESTs, Weakly similar to RIKEN cDNA 5730493B19                              |
| 2610042L04I | Mm.204   | BM195235  | 1 | 304  | 99  | 574  | 63  | 0.00599 | 1.89 | 2610042L04Rik RIKEN cDNA 2610042L04 gene                                   |
| NULL        | Mm.4025  | B1664122  | 1 | 426  | 76  | 806  | 193 | 0.02175 | 1.89 | NCI_CGAP_Mam6 Mus musculus cDNA clone IMAGE:5323376 5'                     |
| NULL        | Mm.44883 | BM118398  | 1 | 775  | 104 | 1472 | 124 | 0.00014 | 1.9  | Mus musculus 0 day neonate thymus cDNA, clone:A430017F18                   |
| 6330437E22I | Mm.20845 | BB278628  | 1 | 117  | 20  | 223  | 40  | 0.00938 | 1.9  | 6330437E22Rik RIKEN cDNA 6330437E22 gene                                   |
| 0610013D04  | Mm.19633 | BG075321  | 1 | 432  | 45  | 825  | 78  | 0.00033 | 1.91 | 0610013D04Rik RIKEN cDNA 0610013D04 gene                                   |
| D5ErtD593e  | Mm.21965 | BB667844  | 1 | 1354 | 345 | 2601 | 456 | 0.00479 | 1.92 | D5ErtD593e DNA segment, Chr 5, ERATO Doi 593, expressed                    |
| NULL        | Mm.30245 | B1454991  | 1 | 338  | 102 | 651  | 21  | 0.00941 | 1.92 | phosphatidylserine decarboxylase, clone MGC:7133 IMAGE:3158145             |
| NULL        | Mm.25427 | BB794641  | 1 | 2627 | 623 | 5061 | 329 | 0.00098 | 1.93 | ESTs                                                                       |
| 3110038L01I | Mm.29429 | NM_026524 | 1 | 2247 | 412 | 4334 | 719 | 0.00399 | 1.93 | 3110038L01Rik RIKEN cDNA 3110038L01 gene                                   |
| 2810485I05F | Mm.24617 | BM215139  | 1 | 107  | 32  | 207  | 44  | 0.01079 | 1.93 | 2810485I05Rik RIKEN cDNA 2810485I05 gene                                   |
| 6330437E22I | Mm.20845 | BB278628  | 1 | 149  | 61  | 289  | 81  | 0.03334 | 1.94 | 6330437E22Rik RIKEN cDNA 6330437E22 gene                                   |
| 6720485C15  | Mm.18163 | NM_026551 | 1 | 852  | 36  | 1695 | 54  | 0       | 1.99 | Mus musculus RIKEN cDNA 6720485C15 gene (6720485C15Rik), mRNA              |
| 3100002B05  | Mm.46397 | BM934830  | 1 | 79   | 37  | 161  | 49  | 0.03976 | 2.02 | 3100002B05Rik RIKEN cDNA 3100002B05 gene                                   |
| D3ErtD330e  | Mm.25703 | BG070740  | 1 | 86   | 31  | 173  | 55  | 0.04116 | 2.02 | D3ErtD330e DNA segment, Chr 3, ERATO Doi 330, expressed                    |
| 2610042L04I | Mm.204   | BM195235  | 1 | 488  | 183 | 1007 | 110 | 0.00473 | 2.06 | 2610042L04Rik RIKEN cDNA 2610042L04 gene                                   |
| 1300012C15  | Mm.10497 | BC011116  | 1 | 1809 | 345 | 3806 | 342 | 0.00018 | 2.1  | 1300012C15Rik RIKEN cDNA 1300012C15 gene                                   |
| Hn1         | Mm.1775  | B1453712  | 1 | 1432 | 114 | 3055 | 146 | 0       | 2.13 | Hn1 hematological and neurological expressed sequence 1                    |
| 1810007I17F | Mm.25754 | BB475271  | 1 | 1013 | 506 | 2161 | 249 | 0.01528 | 2.13 | 1810007I17Rik RIKEN cDNA 1810007I17 gene                                   |
| NULL        | NULL     | BG066923  | 1 | 193  | 63  | 416  | 126 | 0.03385 | 2.16 | NIA Mouse 15K cDNA Clone Set Mus musculus cDNA clone H3048E11 3'           |
| EST         | Mm.7202  | AA717264  | 1 | 114  | 70  | 248  | 40  | 0.02085 | 2.18 | ESTs                                                                       |
| 2310030G06  | Mm.15454 | NM_025865 | 1 | 542  | 189 | 1194 | 197 | 0.00309 | 2.2  | 2310030G06Rik RIKEN cDNA 2310030G06 gene                                   |
| 6330404E11I | Mm.15369 | AV274554  | 1 | 147  | 72  | 325  | 82  | 0.01762 | 2.2  | RIKEN cDNA 6330404E11 gene                                                 |
| BB315716 RI | Mm.19309 | BB315716  | 1 | 3355 | 394 | 7915 | 627 | 0.00006 | 2.36 | RIKEN full-length enriched, male corpora quadrigemina clone B230359J01 3'  |
| 4930586I02F | Mm.46150 | NM_026580 | 1 | 589  | 39  | 1420 | 211 | 0.0045  | 2.41 | 4930586I02Rik RIKEN cDNA 4930586I02 gene                                   |
| 2310047C17  | Mm.35669 | BC028439  | 1 | 125  | 39  | 316  | 93  | 0.0196  | 2.52 | 2310047C17Rik RIKEN cDNA 2310047C17 gene                                   |
| 6330417L24I | Mm.21020 | BC024724  | 1 | 58   | 23  | 148  | 50  | 0.03238 | 2.53 | 6330417L24Rik RIKEN cDNA 6330417L24 gene                                   |
| 2410027J01F | Mm.26928 | AI195046  | 1 | 288  | 50  | 793  | 175 | 0.01161 | 2.75 | 2410027J01Rik RIKEN cDNA 2410027J01 gene                                   |
| NULL        | Mm.20911 | BC024836  | 1 | 52   | 31  | 146  | 21  | 0.00464 | 2.79 | Mus musculus 12 days embryo male wolffian duct cDNA, clone:6720471E05      |
| BB406585 RI | Mm.19309 | BB406585  | 1 | 1583 | 87  | 4487 | 322 | 0.00042 | 2.83 | RIKEN full-length enriched, ES cells Mus musculus cDNA clone C330046M01 3' |
| B130052G07  | Mm.22856 | BC024141  | 1 | 152  | 29  | 459  | 56  | 0.00021 | 3.01 | B130052G07Rik RIKEN cDNA B130052G07 gene                                   |
| BB406585 RI | Mm.19309 | BB406585  | 1 | 2007 | 345 | 6163 | 215 | 0.00001 | 3.07 | RIKEN full-length enriched, ES cells Mus musculus clone C330046M01 3'      |
| 4930586I02F | Mm.46150 | AK006346  | 1 | 247  | 145 | 761  | 176 | 0.0041  | 3.08 | 4930586I02Rik RIKEN cDNA 4930586I02 gene                                   |
| 2210408B16  | Mm.41565 | AI987654  | 1 | 221  | 44  | 839  | 102 | 0.00038 | 3.79 | 2210408B16Rik RIKEN cDNA 2210408B16 gene                                   |
| 2210408B16  | Mm.41565 | BC026817  | 1 | 292  | 74  | 1129 | 98  | 0.00001 | 3.86 | 2210408B16Rik RIKEN cDNA 2210408B16 gene                                   |
| 1500011J06F | Mm.27799 | BB560177  | 1 | 188  | 56  | 772  | 192 | 0.00431 | 4.1  | 500011J06Rik RIKEN cDNA 1500011J06 gene                                    |

SUPPLEMENTAL TABLE 4

Changes in gene expression in the liver of MGSKO mice as compared with wild-type littermates. See legend to Supplemental Table 1. Exp, MGSKO samples.

**CARBOHYDRATE METABOLISM**

| GeneSymbol | Genbank   | Unigene   | A/P | Ctl Mean | Ctl stdev | Exp Mean | Exp stdev | P-value | Fold Change | Gene Description                                      |
|------------|-----------|-----------|-----|----------|-----------|----------|-----------|---------|-------------|-------------------------------------------------------|
| Glicc1     | AF374476  | Mm.274415 | 0.8 | 48       | 27        | 110      | 19        | 0.0138  | -2.26       | glucocorticoid induced transcript 1                   |
| Gyk        | BF683028  | Mm.246682 | 1   | 2957     | 732       | 4701     | 571       | 0.00945 | -1.59       | glycerol kinase                                       |
| Gpd2       | NM_010274 | Mm.3711   | 1   | 1035     | 264       | 1634     | 211       | 0.01225 | -1.58       | glycerol phosphate dehydrogenase 2, mitochondrial     |
| Tktl1      | NM_031379 | Mm.25057  | 1   | 176      | 31        | 117      | 35        | 0.04624 | 1.5         | transketolase-like 1                                  |
| Slc3a1     | NM_009205 | Mm.227176 | 1   | 2145     | 579       | 1215     | 345       | 0.03995 | 1.77        | solute carrier family 3, member 1                     |
| Pfkfb3     | NM_133232 | Mm.19669  | 0.8 | 151      | 41        | 73       | 3         | 0.03315 | 2.06        | 6-phosphofructo-2-kinase/fructose-2,6-biphosphatase 3 |

**AMINO ACID METABOLISM**

| GeneSymbol | Genbank   | Unigene   | A/P | Ctl Mean | Ctl stdev | Exp Mean | Exp stdev | P-value | Fold Change | Gene Description                                 |
|------------|-----------|-----------|-----|----------|-----------|----------|-----------|---------|-------------|--------------------------------------------------|
| Loxl4      | NM_053083 | Mm.178767 | 1   | 554      | 69        | 336      | 107       | 0.01894 | 1.65        | lysyl oxidase-like 4                             |
| Bcat2      | AF031467  | Mm.24210  | 1   | 657      | 147       | 338      | 100       | 0.01592 | 1.94        | branched chain aminotransferase 2, mitochondrial |

**LIPID METABOLISM**

| GeneSymbol    | Genbank   | Unigene   | A/P | Ctl Mean | Ctl stdev | Exp Mean | Exp stdev | P-value | Fold Change         | Gene Description                                                   |
|---------------|-----------|-----------|-----|----------|-----------|----------|-----------|---------|---------------------|--------------------------------------------------------------------|
| Apoa4         | BC010769  | Mm.4533   | 1   | 6614     | 21708     | 7732     | 0.02366   | -3.28   | apolipoprotein A-IV |                                                                    |
| Apoa4         | BY036839  | Mm.4533   | 1   | 8593     | 3589      | 24849    | 7272      | 0.01601 | -2.89               | apolipoprotein A-IV                                                |
| Pte2a         | NM_134246 | Mm.202331 | 1   | 746      | 418       | 1834     | 302       | 0.00839 | -2.46               | peroxisomal acyl-CoA thioesterase 2A                               |
| Acacb         | BC022940  | Mm.81793  | 0.8 | 299      | 169       | 688      | 159       | 0.01565 | -2.3                | acetyl-Coenzyme A carboxylase beta                                 |
| 1300002P22Rik | NM_023737 | Mm.28100  | 1   | 9559     | 3651      | 19489    | 3157      | 0.00626 | -2.04               | enoyl-Coenzyme A, hydratase/3-hydroxyacyl Coenzyme A dehydrogenase |
| Mgll          | BI411560  | Mm.272197 | 1   | 5298     | 1285      | 10484    | 267       | 0.00423 | -1.98               | monoglyceride lipase                                               |
| Pte1          | NM_133240 | Mm.277878 | 1   | 1241     | 196       | 2114     | 111       | 0.00058 | -1.7                | peroxisomal acyl-CoA thioesterase 1                                |
| Mgll          | AK006949  | Mm.272197 | 1   | 3518     | 582       | 5920     | 330       | 0.00082 | -1.68               | monoglyceride lipase                                               |
| Mgll          | NM_011844 | Mm.272197 | 1   | 4111     | 698       | 6852     | 347       | 0.00215 | -1.67               | monoglyceride lipase                                               |
| Pctp          | AF114437  | Mm.5062   | 1   | 3987     | 386       | 6638     | 567       | 0.00058 | -1.66               | phosphatidylcholine transfer protein                               |
| Pctp          | NM_008796 | Mm.5062   | 1   | 3221     | 790       | 5166     | 427       | 0.00752 | -1.6                | phosphatidylcholine transfer protein                               |
| Acaa1         | NM_130864 | Mm.205266 | 1   | 18558    | 3723      | 29024    | 1935      | 0.00415 | -1.56               | acetyl-Coenzyme A acyltransferase 1                                |
| Lip1          | AI596237  | Mm.157545 | 1   | 5526     | 518       | 8494     | 1274      | 0.0125  | -1.54               | lysosomal acid lipase 1                                            |
| Fads2         | NM_019699 | Mm.38901  | 1   | 5332     | 387       | 8141     | 945       | 0.00534 | -1.53               | fatty acid desaturase 2                                            |
| Fads2         | BB430611  | Mm.301490 | 1   | 4271     | 185       | 6486     | 663       | 0.00764 | -1.52               | fatty acid desaturase 2                                            |
| Acox1         | AB034914  | Mm.259054 | 1   | 23973    | 5373      | 36158    | 5728      | 0.02105 | -1.51               | acyl-Coenzyme A oxidase 1, palmitoyl                               |

**MISCELLANEOUS METABOLISM**

| GeneSymbol | Genbank   | Unigene   | A/P | Ctl Mean | Ctl stdev | Exp Mean | Exp stdev | P-value | Fold Change | Gene Description                                 |
|------------|-----------|-----------|-----|----------|-----------|----------|-----------|---------|-------------|--------------------------------------------------|
| Vnn1       | NM_011704 | Mm.27154  | 1   | 6508     | 2799      | 13618    | 2020      | 0.00918 | -2.09       | vanin 1                                          |
| Entpd5     | NM_007647 | Mm.10211  | 1   | 6114     | 1258      | 9664     | 937       | 0.00401 | -1.58       | ectonucleoside triphosphate diphosphohydrolase 5 |
| Dgat2l1    | NM_026713 | Mm.41325  | 1   | 355      | 71        | 557      | 119       | 0.03386 | -1.57       | diacylglycerol O-acyltransferase 2-like 1        |
| Rdh6       | NM_009040 | Mm.100276 | 1   | 2357     | 816       | 3574     | 471       | 0.04915 | -1.52       | retinol dehydrogenase 6                          |
| Sultn      | AI647561  | Mm.6824   | 1   | 2902     | 653       | 1618     | 148       | 0.03125 | 1.79        | N-sulfotransferase                               |

**WNT PATHWAY**

| GeneSymbol | Genbank  | Unigene | A/P | Ctl Mean | Ctl stdev | Exp Mean | Exp stdev | P-value | Fold Change | Gene Description            |
|------------|----------|---------|-----|----------|-----------|----------|-----------|---------|-------------|-----------------------------|
| Pkd2       | AF014010 | Mm.6442 | 1   | 627      | 35        | 406      | 100       | 0.0144  | 1.54        | polycystic kidney disease 2 |

**TRANSCRIPTION FACTORS/REGULATION OF TRANSCRIPTION**

| GeneSymbol | Genbank   | Unigene   | A/P | Ctl Mean | Ctl stdev | Exp Mean | Exp stdev | P-value | Fold Change | Gene Description                                                 |
|------------|-----------|-----------|-----|----------|-----------|----------|-----------|---------|-------------|------------------------------------------------------------------|
| Trim30     | AF220015  | Mm.295578 | 0.9 | 151      | 40        | 247      | 26        | 0.01055 | -1.63       | tripartite motif protein 30                                      |
| Hoxa13     | NM_008264 | Mm.333065 | 0.9 | 203      | 36        | 132      | 15        | 0.02345 | 1.54        | homeo box A13                                                    |
| Tie4       | AU045006  | Mm.103638 | 0.5 | 594      | 62        | 360      | 57        | 0.0015  | 1.65        | transducin-like enhancer of split 4, E(spl) homolog (Drosophila) |
| Zfp207     | BB633247  | Mm.102253 | 0.5 | 101      | 16        | 61       | 24        | 0.04264 | 1.65        | zinc finger protein 207                                          |
| Zic3       | BB732077  | Mm.255890 | 1   | 77       | 20        | 40       | 19        | 0.03432 | 1.94        | zinc finger protein of the cerebellum 3                          |
| Hoxb1      | AK017686  | Mm.890    | 0.5 | 130      | 23        | 66       | 8         | 0.00626 | 1.97        | homeo box B1                                                     |
| Etv1       | NM_007960 | Mm.4866   | 0.5 | 62       | 20        | 26       | 12        | 0.02678 | 2.41        | ets variant gene 1                                               |

**EXTRACELLULAR/MATRIX/CYTOPLASM**

| GeneSymbol | Genbank | Unigene | A/P | Ctl Mean | Ctl stdev | Exp Mean | Exp stdev | P-value | Fold Change | Gene Description |
|------------|---------|---------|-----|----------|-----------|----------|-----------|---------|-------------|------------------|
|------------|---------|---------|-----|----------|-----------|----------|-----------|---------|-------------|------------------|



|       |           |           |     |      |     |      |      |         |       |                             |
|-------|-----------|-----------|-----|------|-----|------|------|---------|-------|-----------------------------|
| Inhbe | BC010404  | Mm.3510   | 1   | 1415 | 434 | 3290 | 1030 | 0.02848 | -2.33 | inhibin beta E              |
| Tor3a | NM_023141 | Mm.206737 | 1   | 284  | 38  | 450  | 91   | 0.02814 | -1.59 | torsin family 3, member A   |
| Tor3a | AV290846  | Mm.206737 | 1   | 214  | 48  | 339  | 53   | 0.01324 | -1.59 | torsin family 3, member A   |
| Fgf16 | NM_030614 | Mm.154768 | 0.8 | 229  | 33  | 129  | 44   | 0.01138 | 1.78  | fibroblast growth factor 16 |
| Pspn  | NM_008954 | Mm.86487  | 1   | 334  | 29  | 184  | 24   | 0.00024 | 1.81  | persephin                   |

#### RECEPTOR

| GeneSymbol | Genbank   | Unigene   | A/P | Ctl Mean | Ctl stdev | Exp Mean | Exp stdev | P-value | Fold Change | Gene Description                                                |
|------------|-----------|-----------|-----|----------|-----------|----------|-----------|---------|-------------|-----------------------------------------------------------------|
| Chrna2     | BC011490  | Mm.57350  | 0.5 | 331      | 200       | 768      | 134       | 0.01529 | -2.32       | cholinergic receptor, nicotinic, alpha polypeptide 2 (neuronal) |
| Cd36       | AK004192  | Mm.18628  | 1   | 1440     | 345       | 2985     | 758       | 0.02071 | -2.07       | CD36 antigen                                                    |
| Cd36       | BE307351  | Mm.18628  | 1   | 1553     | 453       | 3119     | 646       | 0.01069 | -2.01       | CD36 antigen                                                    |
| Cd36       | BB534670  | Mm.18628  | 1   | 248      | 101       | 418      | 58        | 0.03486 | -1.68       | CD36 antigen                                                    |
| Ifngr2     | BB283936  | Mm.249364 | 1   | 569      | 82        | 911      | 26        | 0.00141 | -1.6        | interferon gamma receptor 2                                     |
| Mtnr1a     | NM_008639 | Mm.5133   | 1   | 393      | 28        | 599      | 63        | 0.0041  | -1.52       | melatonin receptor 1A                                           |
| Htr3a      | NM_013561 | Mm.4831   | 0.6 | 1006     | 182       | 647      | 42        | 0.03143 | 1.55        | 5-hydroxytryptamine (serotonin) receptor 3A                     |
| Drd2       | NM_010077 | Mm.41970  | 0.5 | 150      | 13        | 90       | 22        | 0.00647 | 1.65        | dopamine receptor 2                                             |
| Ors18      | NM_020290 | Mm.89146  | 1   | 191      | 43        | 110      | 40        | 0.03378 | 1.74        | olfactory receptor 690                                          |
| V1rb7      | NM_053228 | Mm.321507 | 0.5 | 94       | 29        | 48       | 18        | 0.047   | 1.95        | vomeronal 1 receptor, B7                                        |

#### SIGNAL TRANSDUCTION

| GeneSymbol | Genbank   | Unigene  | A/P | Ctl Mean | Ctl stdev | Exp Mean | Exp stdev | P-value | Fold Change | Gene Description                                   |
|------------|-----------|----------|-----|----------|-----------|----------|-----------|---------|-------------|----------------------------------------------------|
| Pex11a     | AV377516  | Mm.20615 | 1   | 2447     | 912       | 4367     | 585       | 0.01649 | -1.78       | adaptor-related protein complex 3, sigma 2 subunit |
| Pex11a     | NM_011068 | Mm.20615 | 1   | 5587     | 1281      | 8407     | 1684      | 0.03729 | -1.5        | adaptor-related protein complex 3, sigma 2 subunit |
| Rgs17      | NM_019958 | Mm.44606 | 1   | 150      | 23        | 96       | 23        | 0.01805 | 1.56        | regulator of G-protein signaling 17                |

#### POST-TRANSLATIONAL MODIFICATION

| GeneSymbol | Genbank   | Unigene   | A/P | Ctl Mean | Ctl stdev | Exp Mean | Exp stdev | P-value | Fold Change | Gene Description                                      |
|------------|-----------|-----------|-----|----------|-----------|----------|-----------|---------|-------------|-------------------------------------------------------|
| Sphk2      | AF245448  | Mm.24222  | 1   | 722      | 224       | 1268     | 205       | 0.01159 | -1.76       | sphingosine kinase 2                                  |
| Prkcn      | NM_029239 | Mm.252776 | 1   | 2342     | 370       | 3684     | 740       | 0.03169 | -1.57       | protein kinase C, nu                                  |
| Gmfb       | BG066438  | Mm.87312  | 1   | 206      | 15        | 318      | 52        | 0.01494 | -1.54       | glia maturation factor, beta                          |
| Cask       | NM_009806 | Mm.253779 | 0.5 | 178      | 43        | 110      | 28        | 0.04668 | 1.62        | calcium/calmodulin-dependent serine, Y protein kinase |
| Mark1      | AF453686  | Mm.7445   | 0.5 | 173      | 44        | 106      | 22        | 0.04328 | 1.63        | ELKL motif serine-threonine protein kinase 3          |

#### MITOCHODRION

| GeneSymbol | Genbank   | Unigene   | A/P | Ctl Mean | Ctl stdev | Exp Mean | Exp stdev | P-value | Fold Change | Gene Description                           |
|------------|-----------|-----------|-----|----------|-----------|----------|-----------|---------|-------------|--------------------------------------------|
| Mte1       | NM_134188 | Mm.45431  | 1   | 8317     | 3469      | 14482    | 2850      | 0.03347 | -1.74       | mitochondrial acyl-CoA thioesterase 1      |
| Decr1      | NM_026172 | Mm.24395  | 1   | 1724     | 344       | 2746     | 416       | 0.00914 | -1.59       | 2,4-dienoyl CoA reductase 1, mitochondrial |
| Bcl2l      | BM228788  | Mm.238213 | 1   | 1468     | 189       | 883      | 88        | 0.00501 | 1.66        | Bcl2-like                                  |

#### MEMBRANE

| GeneSymbol | Genbank   | Unigene   | A/P | Ctl Mean | Ctl stdev | Exp Mean | Exp stdev | P-value | Fold Change | Gene Description                                                    |
|------------|-----------|-----------|-----|----------|-----------|----------|-----------|---------|-------------|---------------------------------------------------------------------|
| Abcc6      | NM_018795 | Mm.63514  | 1   | 996      | 180       | 2500     | 521       | 0.00552 | -2.51       | ATP-binding cassette, sub-family C (CFTR/MRP), member 6             |
| Gca        | BC021450  | Mm.219877 | 0.5 | 23       | 17        | 50       | 10        | 0.04339 | -2.14       | granulocystin, EF-hand calcium binding protein                      |
| Ttgn1      | BB775176  | Mm.4142   | 1   | 8342     | 4154      | 17415    | 3471      | 0.01539 | -2.09       | trans-golgi network protein 1                                       |
| H2-D1      | X00246    | Mm.299320 | 0.5 | 103      | 53        | 190      | 33        | 0.03947 | -1.84       | olfactory receptor MOR218-1                                         |
| Clstn3     | AV341395  | Mm.193701 | 1   | 1700     | 837       | 3079     | 115       | 0.04698 | -1.81       | calsyntenin 3                                                       |
| Slc22a5    | NM_011396 | Mm.42253  | 1   | 2108     | 667       | 3662     | 925       | 0.04158 | -1.74       | solute carrier family 22 (organic cation transporter), member 5     |
| Elovl5     | NM_134255 | Mm.19130  | 1   | 13303    | 1978      | 22698    | 2067      | 0.0006  | -1.71       | ELOVL family member 5, elongation of long chain fatty acids (yeast) |
| Tgoln1     | BF228156  | Mm.246563 | 1   | 2831     | 634       | 4631     | 955       | 0.02566 | -1.64       | trans-golgi network protein                                         |
| Slc22a5    | AF111425  | Mm.42253  | 1   | 1203     | 400       | 1938     | 169       | 0.02789 | -1.61       | solute carrier family 22 (organic cation transporter), member 5     |
| Slc4a4     | NM_018760 | Mm.41044  | 1   | 610      | 208       | 932      | 114       | 0.04264 | -1.53       | solute carrier family 4 (anion exchanger), member 4                 |
| Tde1       | NM_012032 | Mm.4962   | 1   | 4419     | 743       | 2888     | 779       | 0.02945 | 1.53        | tumor differentially expressed 1                                    |
| Tde1       | BE691746  | Mm.4962   | 1   | 7812     | 1624      | 5025     | 1156      | 0.03826 | 1.55        | tumor differentially expressed 1                                    |
| Vps11      | AK004695  | Mm.295013 | 1   | 847      | 39        | 493      | 171       | 0.02772 | 1.72        | vacuolar protein sorting 11 (yeast)                                 |
| Vcam1      | NM_011693 | Mm.76649  | 1   | 426      | 41        | 246      | 73        | 0.00792 | 1.73        | vascular cell adhesion molecule 1                                   |
| Efna3      | AA388313  | Mm.8547   | 0.5 | 261      | 47        | 146      | 29        | 0.00955 | 1.78        | ephrin A3                                                           |
| Cav2       | NM_016900 | Mm.31915  | 1   | 316      | 98        | 163      | 32        | 0.04172 | 1.94        | caveolin 2                                                          |
| Lect1      | NM_010701 | Mm.46561  | 0.8 | 329      | 95        | 158      | 61        | 0.03007 | 2.08        | leukocyte cell derived chemotaxin 1                                 |

#### NUCLEIC ACID ASSOCIATED PROTEINS

| GeneSymbol | Genbank   | Unigene  | A/P | Ctl Mean | Ctl stdev | Exp Mean | Exp stdev | P-value | Fold Change | Gene Description                                |
|------------|-----------|----------|-----|----------|-----------|----------|-----------|---------|-------------|-------------------------------------------------|
| Sfrs3      | AV135383  | Mm.6787  | 1   | 413      | 29        | 650      | 97        | 0.0097  | -1.57       | splicing factor, arginine/serine-rich 3 (SRP20) |
| Hrb        | CA748278  | Mm.6461  | 1   | 176      | 19        | 267      | 47        | 0.02407 | -1.52       | HIV-1 Rev binding protein                       |
| Hnrph1     | BB164501  | Mm.21740 | 0.6 | 294      | 53        | 191      | 50        | 0.03093 | 1.54        | heterogeneous nuclear ribonucleoprotein H1      |
| Snrpa1     | BC013777  | Mm.821   | 1   | 335      | 11        | 208      | 30        | 0.00136 | 1.61        | small nuclear ribonucleoprotein polypeptide A'  |
| Gmn        | NM_020567 | Mm.12239 | 1   | 386      | 83        | 234      | 49        | 0.02607 | 1.65        | geminin                                         |

#### PROTEIN CATABOLISM

| GeneSymbol | Genbank  | Unigene   | A/P | Ctl Mean | Ctl stdev | Exp Mean | Exp stdev | P-value | Fold Change | Gene Description                              |
|------------|----------|-----------|-----|----------|-----------|----------|-----------|---------|-------------|-----------------------------------------------|
| Pace4      | BI157485 | Mm.294007 | 1   | 1364     | 279       | 2636     | 602       | 0.01855 | -1.93       | paired basic amino acid cleaving system 4     |
| Pcsk5      | D17583   | Mm.3401   | 0.5 | 337      | 51        | 224      | 20        | 0.01483 | 1.5         | proprotein convertase subtilisin/kexin type 5 |
| Siah1a     | AA982064 | Mm.6765   | 1   | 526      | 71        | 344      | 63        | 0.00901 | 1.53        | seven in absentia 1A                          |

#### MISCELLANEOUS

| GeneSymbol | Genbank   | Unigene   | A/P | Ctl Mean | Ctl stdev | Exp Mean | Exp stdev | P-value | Fold Change | Gene Description                                                       |
|------------|-----------|-----------|-----|----------|-----------|----------|-----------|---------|-------------|------------------------------------------------------------------------|
| Fsp27      | BB221402  | Mm.10026  | 1   | 223      | 124       | 1040     | 403       | 0.01795 | -4.65       | fat specific gene 27                                                   |
| Lamb3      | NM_008484 | Mm.287014 | 1   | 206      | 87        | 565      | 42        | 0.00176 | -2.73       | laminin, beta 3                                                        |
| Unc119     | BC001990  | Mm.284811 | 0.5 | 265      | 103       | 469      | 85        | 0.02249 | -1.77       | unc-119 homolog (C. elegans)                                           |
| Olfm3      | BB667895  | Mm.54183  | 1   | 57       | 8         | 94       | 15        | 0.00916 | -1.65       | Mus musculus similar to olfactomedin 3 (LOC381467)                     |
| Stxbp2     | AI314898  | Mm.7247   | 0.6 | 435      | 99        | 716      | 145       | 0.02419 | -1.64       | syntaxin binding protein 2                                             |
| Ysg2       | BM248160  | Mm.196345 | 1   | 371      | 114       | 586      | 106       | 0.03404 | -1.58       | yolk sac gene 2                                                        |
| PRUNEM1    | BQ176370  | Mm.322809 | 1   | 672      | 107       | 1058     | 124       | 0.00335 | -1.58       | PIHUSD salivary proline-rich glycoprotein precursor PRB4               |
| Tor1b      | BC018456  | Mm.249164 | 1   | 504      | 82        | 782      | 108       | 0.00651 | -1.55       | torsin family 1, member B                                              |
| Rtn4       | AK003859  | Mm.192580 | 1   | 3970     | 574       | 6010     | 817       | 0.00953 | -1.51       | reticulon 4                                                            |
| S100a8     | NM_013650 | Mm.21567  | 1   | 228      | 40        | 151      | 25        | 0.02239 | 1.51        | S100 calcium binding protein A8 (calgranulin A)                        |
| Sec61a1    | AF145253  | Mm.28375  | 1   | 1949     | 274       | 1266     | 201       | 0.01024 | 1.54        | Sec61 alpha 1 subunit (S. cerevisiae)                                  |
| Magea3     | NM_020018 | Mm.196413 | 0.5 | 82       | 7         | 53       | 16        | 0.03221 | 1.55        | melanoma antigen, family A, 3                                          |
| Stxbp3     | AI528529  | Mm.12155  | 0.5 | 59       | 8         | 38       | 6         | 0.00861 | 1.55        | syntaxin binding protein 3                                             |
| Nedd9      | BB458177  | Mm.8315   | 0.8 | 247      | 55        | 158      | 20        | 0.03958 | 1.56        | neural precursor cell expressed, developmentally down-regulated gene 9 |
| Slit2      | BB530515  | Mm.23090  | 1   | 121      | 23        | 67       | 16        | 0.01354 | 1.78        | SLITL2: slit-like 2 (Drosophila)                                       |
| Trim10     | NM_011280 | Mm.20159  | 0.8 | 272      | 39        | 150      | 54        | 0.01476 | 1.81        | tripartite motif protein 10                                            |
| Wdpy1      | BM233251  | Mm.293273 | 1   | 762      | 123       | 421      | 169       | 0.0225  | 1.81        | WD repeat and FYVE domain containing 1                                 |

#### UNKNOWN

| GeneSymbol    | Genbank   | Unigene   | A/P | Ctl Mean | Ctl stdev | Exp Mean | Exp stdev | P-value | Fold Change | Gene Description                                            |
|---------------|-----------|-----------|-----|----------|-----------|----------|-----------|---------|-------------|-------------------------------------------------------------|
| D11Lgp2e      | NM_030150 | Mm.271830 | 0.8 | 33       | 29        | 123      | 35        | 0.00812 | -3.65       | DNA segment, Chr 11, Lothar Hennighausen 2, expressed       |
| C80913        | AV094811  | Mm.23997  | 1   | 418      | 214       | 1377     | 331       | 0.00467 | -3.29       | expressed sequence C80913                                   |
| 2310021M12Rik | BC022922  | Mm.142343 | 1   | 806      | 299       | 2044     | 428       | 0.00518 | -2.54       | RIKEN cDNA 2310021M12 gene                                  |
| 6330406P08Rik | AV059397  | Mm.35817  | 1   | 371      | 132       | 846      | 144       | 0.00288 | -2.27       | RIKEN cDNA 6330406P08 gene                                  |
| 5430439H10Rik | AI607291  | Mm.27372  | 0.9 | 92       | 41        | 184      | 30        | 0.01246 | -2          | RIKEN cDNA 5430439H10 gene                                  |
| 6330406P08Rik | AV059397  | Mm.35817  | 1   | 451      | 203       | 892      | 261       | 0.03736 | -1.98       | RIKEN cDNA 6330406P08 gene                                  |
| 0610041D24Rik | NM_025341 | Mm.181473 | 1   | 1528     | 365       | 2763     | 340       | 0.00258 | -1.81       | abhydrolase domain containing 6                             |
| 0710001P09Rik | BY005192  | Mm.20313  | 1   | 94       | 24        | 170      | 40        | 0.02416 | -1.8        | RIKEN cDNA 0710001P09 gene                                  |
| BC016495      | BC016495  | Mm.211595 | 1   | 201      | 47        | 342      | 56        | 0.00855 | -1.7        | cDNA sequence BC016495                                      |
| C230093N12Rik | BC023470  | Mm.4065   | 0.5 | 106      | 38        | 180      | 39        | 0.03629 | -1.69       | RIKEN cDNA C230093N12 gene                                  |
| 1700127B04Rik | BJ731645  | Mm.218639 | 1   | 584      | 178       | 953      | 170       | 0.0243  | -1.63       | RIKEN cDNA 1700127B04 gene                                  |
| D1Erd396e     | AV330655  | Mm.289914 | 0.9 | 142      | 52        | 227      | 25        | 0.0435  | -1.6        | null                                                        |
| 1110023P21Rik | NM_025390 | Mm.22284  | 1   | 384      | 56        | 616      | 56        | 0.0011  | -1.6        | RIKEN cDNA 1110023P21 gene                                  |
| 0610039N19Rik | AI325050  | Mm.146873 | 1   | 2435     | 502       | 3817     | 145       | 0.01326 | -1.57       | RIKEN cDNA 0610039N19 gene                                  |
| 1300006M19Rik | AK008203  | Mm.18814  | 1   | 1688     | 532       | 2657     | 436       | 0.03052 | -1.57       | RIKEN cDNA 1300006M19 gene                                  |
| 4932416F07Rik | BC019143  | Mm.98366  | 1   | 1700     | 205       | 2650     | 472       | 0.02103 | -1.56       | RIKEN cDNA 4932416F07 gene                                  |
| D7Erd156e     | BC024503  | Mm.274811 | 1   | 277      | 30        | 425      | 43        | 0.00264 | -1.53       | DNA segment, Chr 7, ERATO Doi 156, expressed                |
| 2610207I16Rik | AJ293845  | Mm.272905 | 1   | 983      | 286       | 1501     | 207       | 0.0326  | -1.53       | RIKEN cDNA 2610207I16 gene                                  |
| AB041661      | NM_021403 | Mm.271230 | 1   | 353      | 54        | 234      | 43        | 0.01386 | 1.51        | null                                                        |
| 2310016N21Rik | NM_023784 | Mm.154776 | 1   | 581      | 126       | 383      | 82        | 0.04739 | 1.51        | RIKEN cDNA 2310016N21 gene                                  |
| NULL          | BB549997  | Mm.26817  | 1   | 281      | 49        | 186      | 41        | 0.02532 | 1.51        | null                                                        |
| 2610207I16Rik | BM200015  | Mm.272905 | 1   | 3880     | 681       | 5864     | 914       | 0.01317 | 1.51        | RIKEN cDNA 2610207I16 gene                                  |
| 2610036L13Rik | NM_026410 | Mm.23526  | 0.8 | 378      | 29        | 249      | 80        | 0.03997 | 1.52        | RIKEN cDNA 2610036L13 gene                                  |
| 2810439M05Rik | NM_026046 | Mm.288316 | 0.5 | 124      | 26        | 81       | 18        | 0.04615 | 1.52        | RIKEN cDNA 2810439M05 gene                                  |
| BC025872      | BC025872  | Mm.265552 | 1   | 532      | 90        | 349      | 29        | 0.0183  | 1.53        | null                                                        |
| 5830413E08Rik | AK017926  | Mm.21697  | 1   | 983      | 211       | 633      | 187       | 0.04783 | 1.55        | RIKEN cDNA 5830413E08 gene                                  |
| D2Erd217e     | AW551717  | Mm.271147 | 1   | 379      | 26        | 244      | 38        | 0.00225 | 1.55        | Mus musculus 18-day embryo whole body cDNA clone:1110065P14 |
| 4833442J19Rik | AV002340  | Mm.274099 | 1   | 3150     | 519       | 1953     | 454       | 0.01336 | 1.61        | RIKEN cDNA 4833442J19 gene                                  |

|               |           |            |     |      |     |      |     |         |      |                                                           |
|---------------|-----------|------------|-----|------|-----|------|-----|---------|------|-----------------------------------------------------------|
| 4833442J19Rik | AV002340  | Mm.274099  | 1   | 3150 | 519 | 1953 | 454 | 0.01336 | 1.61 | RIKEN cDNA 4833442J19 gene                                |
| 4933416E05Rik | AV226931  | Mm.139010  | 1   | 154  | 36  | 94   | 23  | 0.04037 | 1.63 | RIKEN cDNA 4933416E05 gene                                |
| 2400003B06Rik | CA566638  | Mm.45233   | 1   | 1457 | 199 | 892  | 145 | 0.0059  | 1.63 | RIKEN cDNA 2400003B06 gene                                |
| D430033M16Rik | BB826950  | Mm.307020  | 0.5 | 226  | 42  | 138  | 56  | 0.04785 | 1.64 | Mus musculus transcribed sequences                        |
| 4732471D19Rik | BB750674  | Mm.215784  | 1   | 160  | 33  | 97   | 15  | 0.02749 | 1.65 | null                                                      |
| 4632408A20Rik | BC002159  | Mm.311831  | 1   | 177  | 34  | 105  | 40  | 0.03577 | 1.68 | Mus musculus adult male hippocampus cDNA clone:C630031006 |
| 1110051N18Rik | BC026506  | Mm.287329  | 1   | 221  | 39  | 130  | 57  | 0.04833 | 1.7  | RIKEN cDNA 1110051N18 gene                                |
| 2900097C17Rik | AK013851  | Mm.29909   | 1   | 320  | 28  | 187  | 84  | 0.04024 | 1.71 | null                                                      |
| BC010304      | BB324206  | Mm.315118  | 0.8 | 484  | 101 | 282  | 72  | 0.0231  | 1.71 | null                                                      |
| 4930571B16Rik | AK016268  | Mm.264649  | 1   | 365  | 51  | 204  | 64  | 0.00773 | 1.79 | null                                                      |
| 2010004A03Rik | AK008082  | Mm.77697   | 0.8 | 384  | 104 | 213  | 16  | 0.04862 | 1.8  | null                                                      |
| 2010004A03Rik | AK008082  | Mm.77697   | 0.8 | 384  | 104 | 213  | 16  | 0.04862 | 1.8  | null                                                      |
| 2510027J23Rik | AF439556  | Mm.263163  | 1   | 119  | 14  | 65   | 22  | 0.0094  | 1.82 | RWD domain containing 3                                   |
| NULL          | C79122    | Mm.5791    | 0.5 | 141  | 18  | 76   | 31  | 0.01672 | 1.84 | Mus musculus transcribed sequences                        |
| 2900001A12Rik | NM_025971 | Mm.275052  | 0.8 | 89   | 11  | 47   | 6   | 0.00145 | 1.88 | RIKEN cDNA 2900001A12 gene                                |
| NULL          | AK018829  | Mm.41682.2 | 1   | 639  | 88  | 338  | 87  | 0.00286 | 1.89 | null                                                      |
| 1200020A08Rik | BB775592  | Mm.109329  | 1   | 93   | 16  | 47   | 20  | 0.01219 | 1.96 | RIKEN cDNA 1200020A08 gene                                |
| NULL          | AK013540  | Mm.33954.2 | 0.5 | 132  | 36  | 63   | 35  | 0.03417 | 2.1  | null                                                      |
| 1600014C10Rik | BI246839  | Mm.57075   | 1   | 834  | 126 | 390  | 154 | 0.00434 | 2.14 | RIKEN cDNA 1600014C10 gene                                |
| 2310067E08Rik | BF168366  | Mm.41423   | 0.5 | 36   | 6   | 16   | 11  | 0.02942 | 2.15 | RIKEN cDNA 2310067E08 gene                                |
| NULL          | BB507994  | Mm.2797    | 0.8 | 151  | 35  | 59   | 35  | 0.01079 | 2.54 | Mus musculus 0 day neonate thymus cDNA clone:A430079C03   |
| 0610005C13Rik | AI182092  | Mm.200459  | 1   | 968  | 153 | 4724 | 11  | 0.00002 | 4.88 | RIKEN cDNA 0610005C13 gene                                |

**Supplemental Table 5. Genes whose expression is altered in both gastrocnemius and anterior tibialis muscle in MGSKO mice.**

| <u>GeneSymbol</u>                              | <u>Gene Description</u>                                                    | <u>Unigene</u> | <u>MGSKO</u><br><u>Anterior Tibialis</u> | <u>MGSKO</u><br><u>Gastrocnemius</u> |
|------------------------------------------------|----------------------------------------------------------------------------|----------------|------------------------------------------|--------------------------------------|
| <b><u>Metabolism</u></b>                       |                                                                            |                |                                          |                                      |
| Gys1                                           | Glycogen synthase 1                                                        | Mm.275654      | -144.04 <sup>a</sup>                     | -45.44 <sup>a</sup>                  |
| Ppp1r1a                                        | Protein phosphatase 1, regulatory inhibitor 1                              | Mm.143788      | -9.98                                    | -3.54                                |
| Dcxr                                           | Dicarbonyl L-xylulose reductase                                            | Mm.231091      | -3.81                                    | -2.81                                |
| Slc2a3                                         | Glut3                                                                      | Mm.269857      | -3.23 <sup>a</sup>                       | -1.94 <sup>a</sup>                   |
| Adhfe1                                         | Alcohol dehydrogenase, iron containing, 1                                  | Mm.28514       | -2.90 <sup>a</sup>                       | -1.7                                 |
| Pfkfb3                                         | Fructose-2,6-biphosphatase 3                                               | Mm.19669       | -2.7                                     | -2.11 <sup>a</sup>                   |
| Acadsb                                         | Acyl-Coenzyme A dehydrogenase                                              | Mm.334274      | -2.41                                    | -1.76                                |
| Bckdhb                                         | Branched chain ketoacid dehydrogenase E1                                   | Mm.12819       | -2.24                                    | -1.56                                |
| Oxct                                           | 3-oxoacid CoA transferase                                                  | Mm.13445       | -2.15 <sup>b</sup>                       | -1.72                                |
| Odc                                            | Ornithine decarboxylase, structural                                        | Mm.34102       | -2.10 <sup>b</sup>                       | -3.39 <sup>b</sup>                   |
| Gpt2                                           | Glutamic pyruvate transaminase 2                                           | Mm.200423      | -1.93 <sup>b</sup>                       | -1.53                                |
| Amd1                                           | S-adenosylmethionine decarboxylase 1                                       | Mm.253533      | -1.79                                    | -2.61 <sup>a</sup>                   |
| RS1                                            | Regulatory solute carrier protein                                          | Mm.17880       | -1.75                                    | -2.04                                |
| Cyp27a1                                        | Cytochrome P450                                                            | Mm.85083       | -1.7                                     | -2.61                                |
| Glul                                           | Glutamate-ammonia ligase (glutamine synthase)                              | Mm.210745      | -1.63 <sup>a</sup>                       | -1.5                                 |
| Acads                                          | Acyl-Coenzyme A dehydrogenase, short chain                                 | Mm.18759       | -1.59                                    | -1.63                                |
| Dbt                                            | Dihydroipoamide branched chain transacylase E2                             | Mm.3636        | -1.5                                     | -1.52                                |
| Car14                                          | Carbonic anhydrase 14                                                      | Mm.306954      | 1.54                                     | 1.88                                 |
| Gpsn2                                          | Steroid 5 alpha-reductase 2                                                | Mm.352239      | 1.72 <sup>a</sup>                        | 1.70 <sup>a</sup>                    |
| Ugp2                                           | UDP-glucose pyrophosphorylase 2                                            | Mm.28877       | 1.78 <sup>a</sup>                        | 1.60 <sup>a</sup>                    |
| Gbe1                                           | Glucan (1,4-alpha-), branching enzyme 1                                    | Mm.29201       | 2.26                                     | 1.89                                 |
| Aacs                                           | Acetoacetyl-CoA synthetase                                                 | Mm.296918      | 3.83 <sup>a</sup>                        | 2.61 <sup>a</sup>                    |
| <b><u>Muscle/Contractile Proteins</u></b>      |                                                                            |                |                                          |                                      |
| Ddit4l                                         | Ddit4l DNA-damage-inducible transcript 4-like                              | Mm.250841      | -2.28 <sup>a</sup>                       | -2.52 <sup>a</sup>                   |
| Ptk9l                                          | PTK9 protein tyrosine kinase 9-like                                        | Mm.274346      | -1.62                                    | -1.6                                 |
| Kif1b                                          | Kinesin family member 1B                                                   | Mm.252497      | 1.52 <sup>a</sup>                        | 1.61                                 |
| Cryab                                          | Crystallin, alpha B                                                        | Mm.178         | 1.58                                     | 1.58                                 |
| Macf1                                          | Microtubule-actin crosslinking factor 1                                    | Mm.3350        | 1.67                                     | 1.62                                 |
| Mid1ip1                                        | Mid1 interacting protein 1                                                 | Mm.29429       | 1.93                                     | 2.53                                 |
| Aqp4                                           | Aquaporin 4, skeletal muscle water channel                                 | Mm.298599      | 1.95                                     | 3.12                                 |
| Actc1                                          | Actin, alpha, cardiac                                                      | Mm.686         | 2.21                                     | 2.45                                 |
| Mybph                                          | Myosin binding protein H, Adenosine A1 receptor                            | Mm.373556      | 2.65                                     | 1.82                                 |
| Myl3                                           | Myosin, light polypeptide 3                                                | Mm.7353        | 4.66 <sup>b</sup>                        | 2.15 <sup>b</sup>                    |
| <b><u>Receptors and Signaling</u></b>          |                                                                            |                |                                          |                                      |
| Wnt4                                           | Wingless-related MMTV integration site 4                                   | Mm.20355       | -5.64                                    | -1.84                                |
| Dkk3                                           | Dickkopf homolog 3 (Xenopus laevis)                                        | Mm.55143       | -4.38                                    | -4.2 <sup>a</sup>                    |
| Tnfrsf19                                       | Tumor necrosis factor receptor, member 19                                  | Mm.281356      | -2.62                                    | -2.01 <sup>a</sup>                   |
| Fgfbp1                                         | Fibroblast growth factor binding protein 1                                 | Mm.46053       | -1.99                                    | -4.66                                |
| 2310043K02Rik                                  | Phosphoprotein phosphatase activity                                        | Mm.23916       | -1.94                                    | -3.15                                |
| C330021A05Rik                                  | Rab-related GTP-binding protein                                            | Mm.271656      | -1.72                                    | -1.78                                |
| Styx                                           | Phosphoserine/threonine/tyrosine interaction                               | Mm.202561      | -1.59                                    | -1.67                                |
| Mapkapk5                                       | MAP kinase-activated protein kinase 5                                      | Mm.272206      | 1.54                                     | 1.97                                 |
| 1810073P09Rik                                  | Kinase activity                                                            | Mm.342723      | 1.54                                     | 1.87                                 |
| Chrna1                                         | Cholinergic receptor, nicotinic, alpha polypeptide 1                       | Mm.4583        | 1.69                                     | 1.5                                  |
| Ppap2a                                         | Phosphatidic acid phosphatase 2a                                           | Mm.317186      | 1.71 <sup>a</sup>                        | 1.59                                 |
| Pkn1                                           | Protein kinase N1                                                          | Mm.213000      | 1.74                                     | 2                                    |
| Dusp6                                          | Dual specificity phosphatase 6                                             | Mm.1791        | 1.78                                     | 1.76                                 |
| Stk2                                           | STE20-like kinase                                                          | Mm.281011      | 2.06                                     | 1.51                                 |
| 2310047C17Rik                                  | Intracellular signaling cascade                                            | Mm.203866      | 2.19 <sup>a</sup>                        | 1.71 <sup>b</sup>                    |
| Ntsr2                                          | Neurotensin receptor 2                                                     | Mm.281715      | 3.5                                      | 1.86                                 |
| <b><u>Nucleic Acid Associated Proteins</u></b> |                                                                            |                |                                          |                                      |
| Creg                                           | Cellular repressor of E1A-stimulated genes                                 | Mm.294885      | -1.89 <sup>a</sup>                       | -2.12 <sup>a</sup>                   |
| Asb4                                           | Ankyrin repeat, SOCS box-containing protein 4                              | Mm.51340       | -1.69                                    | -1.94 <sup>a</sup>                   |
| Pop4                                           | Processing of precursor 4                                                  | Mm.22284       | -1.69                                    | -1.55                                |
| 2510005D08Rik                                  | N-methyltransferase                                                        | Mm.45225       | -1.58                                    | -1.74 <sup>a</sup>                   |
| Tfip11                                         | Tuftelin interacting protein 11, AA407270                                  | Mm.27585       | 1.6                                      | 2.17                                 |
| Zfp292/Zn16                                    | Zinc finger protein 292                                                    | Mm.38193       | 1.61                                     | 1.73                                 |
| Ankrd32                                        | Ankyrin repeat domain 32                                                   | Mm.209730      | 1.76                                     | 1.86                                 |
| Smarca1                                        | SWI/SNF related, matrix associated, actin dependent regulator of chromatin | Mm.229151      | 2.76                                     | 2.67                                 |

### **Integral to Membrane**

|               |                                                                          |           |                    |       |
|---------------|--------------------------------------------------------------------------|-----------|--------------------|-------|
| Gdap1         | Ganglioside-induced differentiation-associated-1                         | Mm.18218  | -3.66              | -1.6  |
| 1810057C19Rik | Integral to membrane                                                     | Mm.212428 | -3.12              | -4.29 |
| Slc40a1       | Solute carrier family 40, member 1                                       | Mm.28756  | -1.92              | -1.75 |
| H47           | Histocompatibility 47                                                    | Mm.22362  | -1.92 <sup>a</sup> | -1.54 |
| 1300010A20Rik | Integral to membrane                                                     | Mm.225289 | -1.9               | -1.79 |
| Slc25a20      | Solute carrier family 25, member 20                                      | Mm.29666  | -1.89              | -1.61 |
| Daf1          | Decay accelerating factor 1                                              | Mm.101591 | 1.57               | 1.54  |
| Atp1b2        | ATPase, Na <sup>+</sup> /K <sup>+</sup> transporting, beta               | Mm.235204 | 1.71               | 1.51  |
| Atp1b4        | ATPase, Na <sup>+</sup> /K <sup>+</sup> transporting, beta 4 polypeptide | Mm.60134  | 3.42               | 1.6   |

### **Other**

|               |                                                |           |                   |       |
|---------------|------------------------------------------------|-----------|-------------------|-------|
| 1810008K03Rik | RIKEN cDNA 1810008K03 gene                     | Mm.35083  | -2.63             | -1.67 |
| Gstk1         | Glutathione S-transferase kappa 1              | Mm.267014 | -2.03             | -1.85 |
| Pace4         | Paired basic amino acid cleaving system 4      | Mm.294007 | -1.76             | -1.59 |
| L0273G12 3'   | AW556821                                       | Mm.254283 | -1.74             | -1.86 |
| Sepp1         | Selenoprotein X 1, cellular protein metabolism | Mm.28212  | -1.72             | -1.53 |
| As3mt         | Arsenic (+3 oxidation state) methyltransferase | Mm.28566  | -1.69             | -1.58 |
| Oplah         | 5-oxoprolinase (ATP-hydrolysing)               | Mm.322738 | -1.65             | -1.82 |
| 2810432L12Rik | RIKEN cDNA 2810432L12 gene                     | Mm.24564  | 1.7               | 1.98  |
| Ptx3          | Pentaxin related gene                          | Mm.276776 | 1.78              | 1.85  |
| 2700038N03Rik | RIKEN cDNA 2700038N03 gene                     | Mm.124666 | 1.79              | 1.83  |
| Hn1           | Hematological/neurological expressed seq 1     | Mm.1775   | 1.88 <sup>a</sup> | 1.52  |
| 0610013D04Rik | RIKEN cDNA 0610013D04 gene, D17Ert288e         | Mm.196330 | 1.91              | 1.76  |
| D5Ert593e     | DNA segment, Chr 5, ERATO Doi 593, expressed   | Mm.21965  | 1.92              | 1.97  |
| 2610042L04Rik | RIKEN cDNA 2610042L04 gene                     | Mm.321089 | 1.98 <sup>a</sup> | 1.93  |

a: Average of 2 probe sets detected in this experiment

b: Average of 3 probe sets detected in this experiment
